# Supplementary material for: Development of locally relevant clinical guidelines for procedure-related neonatal analgesic practice in Kenya: a systematic review and meta-analysis
Source: PubMed Central journal article supplement (PMC7507957; doi:10.1016/s2352-4642(20)30182-6), 2020-10
Supplement: mmc1.pdf [file mmc1.pdf]

# THE LANCET

## Child & Adolescent Health

### Supplementary appendix

This appendix formed part of the original submission and has been peer reviewed. We post it as supplied by the authors.

Supplement to: Wade C, Frazer JS, Qian E, et al. Development of locally relevant clinical guidelines for procedure-related neonatal analgesic practice in Kenya: a systematic review and meta-analysis. *Lancet Child Adolesc Health* 2020; published online July 28. [http://dx.doi.org/10.1016/S2352-4642\(20\)30182-6](http://dx.doi.org/10.1016/S2352-4642(20)30182-6).

**Supplementary Table 1. Search strategy for MEDLINE\***

|    |                                                                                               |
|----|-----------------------------------------------------------------------------------------------|
| 1  | INFANT,NEWBORN/                                                                               |
| 2  | INFANT,PREMATURE/                                                                             |
| 3  | (neonate* or newborn* or infant* or baby or babies).ab,ti.                                    |
| 4  | 1 or 2 or 3                                                                                   |
| 5  | ANALGESIA/                                                                                    |
| 6  | ANALGESICS/                                                                                   |
| 7  | CONSCIOUS SEDATION/                                                                           |
| 8  | DEEP SEDATION/                                                                                |
| 9  | PAIN MANAGEMENT/                                                                              |
| 10 | PAIN,PROCEDURAL/                                                                              |
| 11 | PAIN,POSTOPERATIVE/                                                                           |
| 12 | (pain or analges* or sedat*).ab,ti.                                                           |
| 13 | ("oral sucrose" or "oral dextrose" or "oral glucose").ab,ti.                                  |
| 14 | ("breast milk" or breastfeed*).ab,ti.                                                         |
| 15 | (sucking or pacifier*).ab,ti.                                                                 |
| 16 | ("skin to skin" or Kangaroo).ab,ti.                                                           |
| 17 | "swaddl*".ab,ti.                                                                              |
| 18 | (music or singing or lullaby).ab,ti.                                                          |
| 19 | (topical and local).ab,ti.                                                                    |
| 20 | (paracetamol or opioid* or ketamine or ibuprofen).ab,ti.                                      |
| 21 | ("dorsal penile nerve block*" or DPNB*)                                                       |
| 22 | 5 or 6 or 7 or 8 or 9 or 10 or 11 or 12 or 13 or 14 or 15 or 16 or 17 or 18 or 19 or 20 or 21 |
| 23 | (procedure* or procedural or intervention*).ab,ti.                                            |
| 24 | (invasive or painful).ab,ti.                                                                  |
| 25 | 23 and 24                                                                                     |
| 26 | ("heel prick*" or "heel stick*" or lancing).ab,ti.                                            |
| 27 | (venepuncture* or venipuncture*).ab,ti.                                                       |
| 28 | "cannulation*".ab,ti.                                                                         |
| 29 | "injection*".ab,ti.                                                                           |
| 30 | (intramuscular or subcutaneous).ab,ti.                                                        |
| 31 | 29 and 30                                                                                     |
| 32 | (catheterisation or catheterization).ab,ti.                                                   |
| 33 | "lumbar puncture*".ab,ti.                                                                     |
| 34 | prongs.ab,ti.                                                                                 |
| 35 | (abscess* and drain*).ab,ti.                                                                  |
| 36 | ("chest drain*" and insert*).ab,ti.                                                           |
| 37 | ("chest drain*" and remov*).ab,ti.                                                            |
| 38 | (clubfoot or "club foot" or talipes).ab,ti.                                                   |
| 39 | (manipulat* or casting or Ponseti).ab,ti.                                                     |
| 40 | 38 and 39                                                                                     |
| 41 | "circumcision*".ab,ti.                                                                        |
| 42 | ("gastric suction*" or "nasogastric suction*").ab,ti.                                         |
| 43 | ("total parenteral " or TPN).ab,ti.                                                           |
| 44 | "central venous catheter*".ab,ti.                                                             |
| 45 | "necroti* enterocolitis".ab,ti.                                                               |
| 46 | 42 or 43 or 44                                                                                |
| 47 | 45 and 46                                                                                     |
| 48 | 25 or 26 or 27 or 28 or 31 or 32 or 33 or 34 or 35 or 36 or 37 or 40 or 41 or 47              |
| 49 | 4 and 22 and 48                                                                               |
| 50 | limit 49 to animals                                                                           |
| 51 | 49 not 50                                                                                     |

\*Search strategies for Embase, CENTRAL and CINAHL were adapted from this strategy

**Supplementary Table 2. List of comparisons included in meta-analysis**

| <b>Analgesic</b>                                       | <b>Comparator</b>               |
|--------------------------------------------------------|---------------------------------|
| <b><i>Heart Rate*</i></b>                              |                                 |
| Breastfeeding                                          | Placebo or no intervention      |
| Expressed breast milk                                  | Placebo or no intervention      |
| Local anaesthesia                                      | Placebo or no intervention      |
| Music                                                  | Placebo or no intervention      |
| Non-nutritive sucking                                  | Placebo or no intervention      |
| Non-nutritive sucking                                  | Oral Sugar                      |
| Skin-to-skin                                           | Skin-to-skin plus breastfeeding |
| Skin-to-skin                                           | Placebo or no intervention      |
| Oral Sugar                                             | Placebo or no intervention      |
| Swaddling                                              | Placebo or no intervention      |
| <b><i>Oxygen Saturation*</i></b>                       |                                 |
| Breastfeeding                                          | Placebo or no intervention      |
| Expressed breast milk                                  | Placebo or no intervention      |
| Local anaesthesia                                      | Placebo or no intervention      |
| Music                                                  | Placebo or no intervention      |
| Non-nutritive sucking                                  | Placebo or no intervention      |
| Non-nutritive sucking                                  | Oral Sugar                      |
| Skin-to-skin                                           | Placebo or no intervention      |
| Oral Sugar                                             | Placebo or no intervention      |
| <b><i>Premature Infant Pain Profile (PIPP)*</i></b>    |                                 |
| Breastfeeding                                          | Placebo or no intervention      |
| Breastfeeding                                          | Oral Sugar                      |
| Expressed breast milk                                  | Placebo or no intervention      |
| Expressed breast milk                                  | Oral Sugar                      |
| Local anaesthesia                                      | Placebo or no intervention      |
| Non-nutritive sucking                                  | Placebo or no intervention      |
| Skin-to-skin                                           | Placebo or no intervention      |
| Skin-to-skin                                           | Oral Sugar                      |
| Skin-to-skin                                           | Swaddling                       |
| Oral Sugar                                             | Placebo or no intervention      |
| <b><i>Neonatal Infant Pain Scale (NIPS)*</i></b>       |                                 |
| Breastfeeding                                          | Placebo or no intervention      |
| Breastfeeding                                          | Skin-to-skin                    |
| Breastfeeding                                          | Oral Sugar                      |
| Non-nutritive sucking                                  | Oral Sugar                      |
| Skin-to-skin                                           | Oral Sugar                      |
| Oral Sugar                                             | Placebo or no intervention      |
| Swaddling                                              | Placebo or no intervention      |
| <b><i>Neonatal Facial Coding System (NFCS)*</i></b>    |                                 |
| Expressed breast milk                                  | Placebo or no intervention      |
| Expressed breast milk                                  | Oral Sugar                      |
| Skin-to-skin                                           | Placebo or no intervention      |
| Oral Sugar                                             | Placebo or no intervention      |
| Local anaesthesia                                      | Placebo or no intervention      |
| <b><i>Douleur Aiguë du Nouveau-né scale (DAN)*</i></b> |                                 |
| Expressed breast milk                                  | Placebo or no intervention      |
| Non-nutritive sucking                                  | Placebo or no intervention      |
| Non-nutritive sucking                                  | Oral Sugar                      |

\* Outcome measure used for these comparisons

**Supplementary Table 3. Study characteristics table of all 149 included studies**

| Study                              | n   | Country      | Methods | Procedure | Groups                                                                 | Outcome measure             | Age (days) at procedure (mean[SD])* |
|------------------------------------|-----|--------------|---------|-----------|------------------------------------------------------------------------|-----------------------------|-------------------------------------|
| Abad 1996 <sup>42</sup>            | 28  | Spain        | RCT, PG | VP        | OS, Placebo                                                            | HR, SpO <sub>2</sub>        | 6·5[3·1]                            |
| Abad 2001 <sup>48</sup>            | 47  | Spain        | RCT, PG | VP        | OS, LA, OS+LA, Placebo                                                 | HR, SpO <sub>2</sub>        | 1·9[0·5]                            |
| Acharya 1998 <sup>130</sup>        | 19  | UK           | RCT, PG | VP        | LA, Placebo                                                            | HR, SpO <sub>2</sub> , NFCS | 27·5[15·5]                          |
| Acharya 2004 <sup>49</sup>         | 39  | UK           | RCT, XG | VP        | OS, Placebo                                                            | HR, SpO <sub>2</sub> , NFCS | 27·2[24·4]                          |
| Ahuja 2000 <sup>50</sup>           | 25  | India        | RCT, XG | IMI       | OS, Placebo, No intervention                                           | HR, SpO <sub>2</sub> , NFCS | 3·5                                 |
| Akcam 2004 <sup>51</sup>           | 34  | Turkey       | RCT, XG | HP        | OS, Placebo                                                            | DAN                         | 4[2·75]                             |
| Akcam 2004 <sup>52</sup>           | 60  | Turkey       | RCT, XG | HP        | OS, Placebo                                                            | DAN                         | 4·5[4·5]                            |
| Altun-Köröglü 2010 <sup>53</sup>   | 75  | Turkey       | RCT, PG | HP        | OS, EBM, Placebo                                                       | NFCS                        | 6·4                                 |
| Aydin 2019 <sup>22</sup>           | 100 | Turkey       | RCT, PG | HP        | BF, No intervention                                                    | NIPS                        | ..                                  |
| Badiee 2009 <sup>131</sup>         | 72  | Iran         | RCT, PG | HP        | PCM, Placebo                                                           | HR, SpO <sub>2</sub> , PIPP | 3·0[0·6]                            |
| Basnet 2010 <sup>54</sup>          | 50  | Nepal        | RCT, PG | VP        | OS, No intervention                                                    | DAN                         | ..                                  |
| Bauer 2004 <sup>55</sup>           | 58  | Germany      | RCT, PG | VP        | OS, Placebo                                                            | HR, PIPP                    | 3·2[0·8]                            |
| Beken 2014 <sup>132</sup>          | 25  | Turkey       | RCT, PG | VP        | OS+NNS, NNS+Placebo                                                    | NIPS                        | ..                                  |
| Bellieni 2001 <sup>56</sup>        | 17  | Italy        | RCT, XG | HP        | OS, OS+NNS, Placebo, No intervention                                   | PIPP                        | ..                                  |
| Bellieni 2002 <sup>92</sup>        | 79  | Italy        | RCT, PG | HP        | OS, NNS, OS+NNS, No intervention                                       | DAN                         | ..                                  |
| Bellieni 2013 <sup>133</sup>       | 62  | Italy        | RCT, XG | IMI       | OS, LA                                                                 | DAN                         | ..                                  |
| Bembich 2018 <sup>34</sup>         | 80  | Italy        | RCT, PG | HP        | OS, BF, EBM, OS+Holding                                                | NIPS                        | ..                                  |
| Biran 2011 <sup>134</sup>          | 76  | France       | RCT, PG | VP        | OS+LA, OS+Placebo                                                      | PIPP, DAN                   | 15·7[9·8]                           |
| Blass 1999 <sup>57</sup>           | 40  | USA          | RCT, PG | HP        | OS, NNS+Placebo, NNS+OS, Placebo                                       | HR                          | ..                                  |
| Brovedani 2007 <sup>38</sup>       | 146 | Italy        | RCT, PG | HP        | OS, BF, SW                                                             | PIPP                        | ..                                  |
| Bucher 1995 <sup>135</sup>         | 16  | Switzerland  | RCT, XG | HP        | OS, Placebo                                                            | HR, SpO <sub>2</sub>        | ..                                  |
| Bueno 2012 <sup>100</sup>          | 88  | Brazil       | RCT, PG | HP        | OS, EBM                                                                | PIPP                        | ..                                  |
| Butt 2000 <sup>136</sup>           | 14  | Canada       | RCT, XG | HP        | M, No intervention                                                     | HR, SpO <sub>2</sub>        | 8·2[3·1]                            |
| Campos 1989 <sup>137</sup>         | 32  | USA          | RCT, PG | HP        | NNS, SW                                                                | HR                          | ..                                  |
| Carbajal 1999 <sup>58</sup>        | 150 | France       | RCT, PG | VP        | OS, NNS, OS+NNS, Placebo, No intervention                              | DAN                         | 3·6[0·4]                            |
| Carbajal 2002 <sup>59</sup>        | 39  | France       | RCT, XG | SC        | OS, OS+NNS, Placebo                                                    | DAN                         | 26·2[6·1]                           |
| Carbajal 2003 <sup>23</sup>        | 179 | France       | RCT, PG | VP        | OS+NNS, BF, Placebo, No intervention                                   | NIPS, DAN                   | 3[0·4]                              |
| Cardoso 2014 <sup>93</sup>         | 80  | Brazil       | RCT, PG | AP        | OS, M, OS+M                                                            | PIPP                        | 4                                   |
| Castral 2008 <sup>104</sup>        | 60  | Brazil       | RCT, PG | HP        | SS, No intervention                                                    | HR, NFCS                    | ..                                  |
| Chermont 2009 <sup>94</sup>        | 640 | Brazil       | RCT, PG | IMI       | OS, SS, OS+SS, Placebo                                                 | PIPP, NIPS, NFCS            | 1·2[0·3]                            |
| Chiabi 2016 <sup>35</sup>          | 100 | Cameroon     | RCT, PG | HP        | OS, BF                                                                 | NIPS                        | 2·3[0·3]                            |
| Codipietro 2008 <sup>36</sup>      | 101 | Italy        | RCT, PG | HP        | OS, BF                                                                 | HR, SpO <sub>2</sub> , PIPP | 3·4[0·5]                            |
| Collados-Gomez 2018 <sup>138</sup> | 66  | Spain        | RCT, XG | VP        | OS+NNS+SW, EBM+NNS+SW                                                  | PIPP                        | 9·1[2·0]                            |
| Cong 2009 <sup>105</sup>           | 14  | USA          | RCT, XG | HP        | SS, No intervention                                                    | HR                          | 6·0[1·0]                            |
| Cong 2011 <sup>106</sup>           | 28  | USA          | RCT, XG | HP        | SS (30 minutes, 80 minutes), No intervention                           | PIPP                        | 5·2[0·9]                            |
| Cong 2012 <sup>107</sup>           | 26  | USA          | RCT, XG | HP        | SS (15 minutes, 30 minutes), No intervention                           | HR                          | 13·9[5·8]                           |
| Cook 2017 <sup>95</sup>            | 40  | USA          | RCT, PG | PICC      | OS, Placebo                                                            | HR, SpO <sub>2</sub> , PIPP | ..                                  |
| Corbo 2000 <sup>122</sup>          | 24  | Italy        | RCT, XG | HP        | NNS, No intervention                                                   | HR                          | 4·7[1·9]                            |
| De Bernardo 2019 <sup>139</sup>    | 66  | Italy        | RCT, PG | VP        | OS (10%, 24%)+NNS                                                      | HR, SpO <sub>2</sub> , NIPS | 22·9[4·9]                           |
| De Melo 2017 <sup>140</sup>        | 28  | Brazil       | RCT, PG | AP        | OS, M                                                                  | NFCS                        | ..                                  |
| Deshmukh 2002 <sup>60</sup>        | 60  | India        | RCT, PG | VP        | OS (10%, 25%), Placebo                                                 | HR, SpO <sub>2</sub>        | 7·1[1·8]                            |
| Dezhdar 2016 <sup>43</sup>         | 82  | Iran         | RCT, PG | VP        | SS, SW, No intervention                                                | HR, PIPP                    | ..                                  |
| Elserafy 2009 <sup>61</sup>        | 36  | Saudi Arabia | RCT, PG | VP        | OS, NNS, NNS+Placebo (water), NNS+OS, Placebo (water), No intervention | HR, SpO <sub>2</sub> , PIPP | ..                                  |
| Eriksson 1999 <sup>62</sup>        | 120 | Sweden       | RCT, PG | VP        | OS, No intervention                                                    | PIPP                        | ..                                  |
| Eriksson 2004 <sup>63</sup>        | 43  | Sweden       | RCT, PG | HP        | OS, Placebo                                                            | PIPP                        | ..                                  |

|                                    |     |                      |         |     |                                                          |                                   |            |
|------------------------------------|-----|----------------------|---------|-----|----------------------------------------------------------|-----------------------------------|------------|
| Erkut 2017 <sup>141</sup>          | 74  | Turkey               | RCT, PG | HP  | SW, No intervention                                      | HR, SpO <sub>2</sub> , PIPP, NIPS | ..         |
| Fallah 2017 <sup>41</sup>          | 120 | Iran                 | RCT, PG | IMI | BF, SS, SW                                               | NIPS                              | ..         |
| Field 1984 <sup>118</sup>          | 96  | USA                  | RCT, PG | HP  | NNS, No intervention                                     | HR                                | 7·0[3·4]   |
| Gajbhiye 2018 <sup>24</sup>        | 150 | India                | RCT, PG | IMI | OS, BF, No intervention                                  | HR, SpO <sub>2</sub> , PIPP       | 1·8[0·2]   |
| Gao 2015 <sup>117</sup>            | 76  | China                | RCT, PG | HP  | SS, No intervention                                      | HR                                | 4·3[0·2]   |
| Gao 2018 <sup>64</sup>             | 86  | China                | RCT, PG | HP  | OS, NNS, OS+NNS, No intervention                         | HR, SpO <sub>2</sub> , PIPP       | 5·1[0·2]   |
| Gerull 2013 <sup>142</sup>         | 25  | Switzerland          | RCT, PG | HP  | OS, SW, OS+SW                                            | HR                                | ..         |
| Gharehbaghi 2007 <sup>65</sup>     | 60  | Iran                 | RCT, PG | VP  | OS, Placebo                                              | HR                                | 5·6[1·1]   |
| Gibbins 2002 <sup>143</sup>        | 190 | Canada               | RCT, PG | HP  | OS, OS+NNS, NNS+Placebo(water)                           | PIPP                              | ..         |
| Golestan 2007 <sup>96</sup>        | 60  | Iran                 | RCT, PG | IMI | OS, Placebo, No intervention                             | HR                                | 0·6[0·1]   |
| Gormally 2001 <sup>97</sup>        | 85  | Canada               | RCT, PG | HP  | OS, OS+Holding, Placebo (water)+Holding, No intervention | HR                                | 2·3[0·3]   |
| Gradin 2002 <sup>144</sup>         | 196 | Sweden               | RCT, PG | VP  | OS+Placebo (cream), LA+Placebo (water)                   | HR, PIPP                          | 4·3[3·3]   |
| Gradin 2004 <sup>66</sup>          | 79  | Sweden               | RCT, PG | VP  | OS, OS+BF, BF+Placebo, Placebo                           | PIPP                              | ..         |
| Gray 2000 <sup>108</sup>           | 30  | USA                  | RCT, PG | HP  | SS, No intervention                                      | HR                                | ..         |
| Gray 2002 <sup>25</sup>            | 30  | USA                  | RCT, PG | HP  | BF, No intervention                                      | HR                                | ..         |
| Gray 2012 <sup>98</sup>            | 45  | USA                  | RCT, PG | VC  | OS, NNS, No intervention                                 | HR                                | ..         |
| Haouari 1995 <sup>44</sup>         | 60  | United Kingdom       | RCT, PG | HP  | OS (12.5%, 25%, 50%), Placebo                            | HR                                | 3·5[0·6]   |
| Harrison 2003 <sup>67</sup>        | 128 | Australia            | RCT, PG | HP  | OS, Placebo                                              | NFCS                              | 18·8[13·3] |
| Hashemi 2016 <sup>26</sup>         | 131 | Iran                 | RCT, PG | IMI | BF, SW, BF+SW, No intervention                           | HR, SpO <sub>2</sub> , NFCS       | 1·7[0·8]   |
| Hatami Bavarsad 2018 <sup>27</sup> | 75  | Iran                 | RCT, PG | IMI | BF, EBM, No intervention                                 | HR, SpO <sub>2</sub> , DAN        | ..         |
| Ho 2016 <sup>145</sup>             | 54  | Hong Kong            | RCT, PG | HP  | SW, No intervention                                      | HR, SpO <sub>2</sub> , PIPP       | 9·9[7·6]   |
| Holsti 2011 <sup>146</sup>         | 57  | Canada               | RCT, PG | HP  | BF, NNS                                                  | HR                                | 9          |
| Hsieh 2018 <sup>99</sup>           | 20  | Taiwan               | RCT, XG | HP  | OS, EBM, Placebo, No intervention                        | PIPP                              | ..         |
| Huang 2004 <sup>147</sup>          | 32  | Taiwan               | RCT, XG | HP  | SW, No intervention                                      | HR, SpO <sub>2</sub> , PIPP       | 7·5[7·1]   |
| Jain 2000 <sup>148</sup>           | 39  | United Kingdom       | RCT, PG | VP  | LA, Placebo                                              | NFCS                              | 7·0[3·8]   |
| Jatana 2003 <sup>45</sup>          | 125 | India                | RCT, PG | HP  | OS, EBM, Placebo                                         | HR, SpO <sub>2</sub>              | ..         |
| Johnston 1997 <sup>68</sup>        | 87  | Canada               | RCT, PG | HP  | OS, SW+Rocking, OS+SW+Rocking, Placebo (water)           | HR                                | 5·7[1·2]   |
| Johnston 1999 <sup>69</sup>        | 47  | Canada               | RCT, PG | HP  | OS, Placebo                                              | PIPP                              | 6·5[1·6]   |
| Johnston 2003 <sup>109</sup>       | 74  | Canada               | RCT, XG | HP  | SS, No intervention                                      | HR, SpO <sub>2</sub> , PIPP       | ..         |
| Johnston 2008 <sup>149</sup>       | 61  | Canada               | RCT, XG | HP  | SS, SW                                                   | PIPP                              | ..         |
| Kashaninia 2008 <sup>110</sup>     | 100 | Iran                 | RCT, PG | IMI | SS, No intervention                                      | NIPS                              | 0·08       |
| Kaur 2003 <sup>150</sup>           | 60  | India                | RCT, PG | LP  | LA, Placebo                                              | HR, SpO <sub>2</sub> , NFCS       | 3·4        |
| Kristoffersen 2018 <sup>151</sup>  | 53  | Norway, South Africa | RCT, XG | VP  | OS (0.2 mL, 0.5 mL)                                      | PIPP                              | ..         |
| Kurdahi Badr 2017 <sup>152</sup>   | 126 | Lebanon              | RCT, XG | HP  | M, No intervention                                       | HR, SpO <sub>2</sub> , PIPP       | ..         |
| Larsson 1998 <sup>153</sup>        | 111 | Sweden               | RCT, PG | VP  | LA, No intervention                                      | NFCS                              | 5·0[0·8]   |
| Leite 2009 <sup>28</sup>           | 60  | Brazil               | RCT, PG | HP  | BF, No intervention                                      | HR, SpO <sub>2</sub> , NFCS       | ..         |
| Lemyre 2007 <sup>154</sup>         | 137 | Canada               | RCT, PG | VP  | OS+LA+NNS+SW, OS+Placebo (cream)+NNS+SW                  | PIPP                              | 6·7[2·2]   |
| Leng 2016 <sup>155</sup>           | 671 | China                | RCT, PG | HP  | OS, OS+NNS, OS+SW, OS+NNS+SW                             | HR, SpO <sub>2</sub> , NIPP, NFCS | ..         |
| Liaw 2010 <sup>119</sup>           | 104 | Taipei, USA          | RCT, PG | HP  | NNS, No intervention                                     | PIPP                              | 6·4[2·0]   |
| Liaw 2011 <sup>70</sup>            | 165 | Taiwan               | RCT, PG | IMI | OS, NNS, No intervention                                 | HR, NFCS                          | 2·5[0·2]   |
| Liaw 2012 <sup>120</sup>           | 34  | Taiwan               | RCT, XG | HP  | NNS, SW, No intervention                                 | PIPP                              | 7·0[5·0]   |
| Lima 2013 <sup>29</sup>            | 64  | Brazil               | RCT, PG | VP  | BF, NNS, No intervention                                 | NIPS                              | ..         |
| Lima 2017 <sup>101</sup>           | 78  | Brazil               | RCT, PG | IMI | OS, NNS                                                  | HR, SpO <sub>2</sub> , NIPS       | 0·8[0·2]   |
| Lindh 2000 <sup>156</sup>          | 56  | Sweden               | RCT, PG | VP  | LA, Placebo                                              | HR                                | 3·4[0·4]   |
| Liu 2010 <sup>71</sup>             | 105 | Taipei               | RCT, PG | VP  | OS, NNS, No intervention                                 | NIPS                              | 3·0[0·6]   |
| Liu 2015 <sup>111</sup>            | 40  | China                | RCT, PG | HP  | SS, No intervention                                      | HR, SpO <sub>2</sub>              | ..         |

|                                   |     |                  |         |         |                                                                                    |                                   |              |
|-----------------------------------|-----|------------------|---------|---------|------------------------------------------------------------------------------------|-----------------------------------|--------------|
| Long 2003 <sup>157</sup>          | 32  | Northern Ireland | RCT, PG | VP      | LA, Placebo                                                                        | NFCS                              | 6·9[1·2]     |
| Ludington-Hoe 2005 <sup>112</sup> | 23  | USA              | RCT, XG | HP      | SS, No intervention                                                                | HR, SpO <sub>2</sub>              | 22[11·4]     |
| Marcatto 2011 <sup>158</sup>      | 30  | Brazil           | RCT, PG | PICC    | OS+LA, OS+Placebo (cream), LA+Placebo (water)                                      | HR, NIPS                          | ..           |
| Marin Gabriel 2013 <sup>159</sup> | 127 | Spain            | RCT, PG | HP      | OS, SS, OS+SS, BF+SS                                                               | HR, SpO <sub>2</sub> , NIPS       | ..           |
| Marofi 2015 <sup>160</sup>        | 50  | Iran             | RCT, PG | HP      | M, No intervention                                                                 | HR, SpO <sub>2</sub> , PIPP       | ..           |
| Mathai 2006 <sup>72</sup>         | 70  | India            | RCT, PG | HP      | OS, EBM, NNS, Placebo                                                              | DAN                               | 1·9[0·01]    |
| Milazzo 2011 <sup>73</sup>        | 47  | USA              | RCT, PG | AP      | OS, No intervention                                                                | HR, SpO <sub>2</sub> , NIPS       | ..           |
| Mirzarahimi 2013 <sup>121</sup>   | 60  | Iran             | RCT, PG | HP      | NNS, No intervention                                                               | HR, SpO <sub>2</sub> , PIPP       | ..           |
| Morrow 2010 <sup>161</sup>        | 42  | USA              | RCT, PG | HP      | SW, No intervention                                                                | NIPS                              | ..           |
| Mosayebi 2014 <sup>162</sup>      | 64  | Iran             | RCT, XG | HP      | SS, SS+SW                                                                          | PIPP                              | 7·3[3·7]     |
| Nimbalkar 2013 <sup>113</sup>     | 47  | India            | RCT, XG | HP      | SS, No intervention                                                                | PIPP                              | ..           |
| Noori Shadkam 2008 <sup>163</sup> | 220 | Iran             | RCT, PG | VP      | OS+Placebo (cream), LA+Placebo (water)                                             | NIPS                              | 4·1          |
| Obeidat 2015 <sup>30</sup>        | 128 | Jordan           | RCT, PG | HP      | BF, No intervention                                                                | PIPP                              | 5·8[0·3]     |
| Ogawa 2005 <sup>74</sup>          | 50  | Japan            | RCT, PG | VP, HP  | OS, Placebo                                                                        | NFCS                              | ..           |
| Okan 2007 <sup>75</sup>           | 93  | Turkey           | RCT, XG | HP      | OS, Placebo                                                                        | HR, SpO <sub>2</sub> , NFCS       | ..           |
| Okan 2010 <sup>114</sup>          | 107 | Turkey           | RCT, PG | HP      | SS, BF+SS, Placebo                                                                 | HR, SpO <sub>2</sub> , NFCS       | 1·4[0·1]     |
| Olsson 2016 <sup>115</sup>        | 10  | Sweden           | RCT, XG | VP      | SS, No intervention                                                                | HR, SpO <sub>2</sub> , PIPP       | 6·6[4·7]     |
| Ors 1999 <sup>76</sup>            | 102 | Turkey           | RCT, PG | HP      | OS, EBM, Placebo                                                                   | HR                                | 1·4[1·6]     |
| Ou-Yang 2013 <sup>77</sup>        | 123 | Taiwan           | RCT, PG | HP      | OS, EBM, Placebo                                                                   | HR, SpO <sub>2</sub> , PIPP       | ..           |
| Overgaard 1999 <sup>78</sup>      | 96  | Denmark          | RCT, PG | HP      | OS, Placebo                                                                        | NIPS                              | ..           |
| Ozdogan 2010 <sup>79</sup>        | 142 | Turkey           | RCT, PG | HP      | OS (single, double dose), EBM (single, double dose), Placebo (double, single dose) | NFCS                              | 2·2[0·2]     |
| Patel 2003 <sup>164</sup>         | 10  | Canada           | RCT, XG | HP      | LA, Placebo                                                                        | PIPP, NIPS                        | 2·8[1·4]     |
| Peng 2018 <sup>165</sup>          | 109 | Taiwan           | RCT, PG | HP      | NNS+EBM, NNS+EBM+SW, No intervention                                               | PIPP                              | 13·1[6·6]    |
| Ramenghi 1996 <sup>47</sup>       | 60  | UK               | RCT, XG | HP      | OS (25%, 50%, sweetener), Placebo                                                  | HR                                | 0·3[0·2]     |
| Ramenghi 1996 <sup>80</sup>       | 15  | United Kingdom   | RCT, XG | HP      | OS, Placebo                                                                        | HR                                | 8·7[6·5]     |
| Rawal 2018 <sup>81</sup>          | 63  | India            | RCT, PG | HP      | OS, EBM, Placebo                                                                   | HR, SpO <sub>2</sub> , PIPP       | 3·1[0·7]     |
| Rioualen 2018 <sup>40</sup>       | 102 | France           | RCT, PG | VP      | OS, BF                                                                             | NFCS                              | 2·9[0·5]     |
| Rogers 2006 <sup>82</sup>         | 33  | USA              | RCT, PG | BC      | OS, Placebo                                                                        | DAN                               | ..           |
| Rossi 2018 <sup>166</sup>         | 120 | Italy            | RCT, PG | IMI, HP | M (Mozarts, Beethoven, heartbeat sounds), No intervention                          | HR, SpO <sub>2</sub> , NIPS       | ..           |
| Saeidi 2011 <sup>116</sup>        | 60  | Iran             | RCT, PG | IMI     | SS, No intervention                                                                | SpO <sub>2</sub> , NIPS           | ..           |
| Sahoo 2013 <sup>83</sup>          | 160 | India            | RCT, PG | VP      | OS, EBM, Placebo                                                                   | HR, SpO <sub>2</sub> , PIPP       | 3·3[0·8]     |
| Sajedi 2006 <sup>84</sup>         | 40  | Iran             | RCT, PG | IMI     | OS, Placebo                                                                        | HR, NIPS                          | ..           |
| Shabani 2016 <sup>167</sup>       | 20  | Iran             | RCT, XG | AP      | M, No intervention                                                                 | HR, SpO <sub>2</sub> , NFCS       | ..           |
| Shah 2017 <sup>168</sup>          | 35  | Australia        | RCT, XG | HP      | OS, M, OS+M                                                                        | HR, SpO <sub>2</sub> , PIPP       | 4·0[6·0]     |
| Shu 2014 <sup>169</sup>           | 50  | Taiwan           | RCT, PG | HP      | SW, No intervention                                                                | HR, SpO <sub>2</sub> , PIPP, NIPS | 1·9[1·0]     |
| Shukla 2018 <sup>170</sup>        | 100 | India            | RCT, PG | HP      | OS, SS                                                                             | PIPP                              | 14·04[11·10] |
| Shukla 2018 <sup>171</sup>        | 200 | India            | RCT, PG | HP      | EBM, SS+EBM, SS+EBM+M, M+EBM                                                       | PIPP                              | 8·2[7·4]     |
| Simonse 2012 <sup>39</sup>        | 70  | Netherlands      | RCT, PG | HP      | OS, BF, EBM                                                                        | PIPP                              | ..           |
| Singh 2017 <sup>31</sup>          | 80  | India            | RCT, PG | HP      | BF, No intervention                                                                | HR, SpO <sub>2</sub>              | ..           |
| Skogsdal 1997 <sup>46</sup>       | 120 | Sweden           | RCT, PG | HP      | OS, EBM, No intervention                                                           | HR, SpO <sub>2</sub>              | 5·4[4·9]     |
| Slater 2010 <sup>85</sup>         | 44  | United Kingdom   | RCT, PG | HP      | OS, Placebo                                                                        | PIPP                              | 3·0[2·0]     |
| Soliman 2016 <sup>172</sup>       | 60  | Egypt            | RCT, PG | CPAP    | LA, No intervention                                                                | PIPP                              | 4·3[2·9]     |
| Soltani 2018 <sup>37</sup>        | 161 | Iran             | RCT, PG | HP      | OS, BF, SS, LA                                                                     | NIPS                              | ..           |
| Stevens 1999 <sup>173</sup>       | 122 | Canada           | RCT, XG | HP      | OS+NNS, NNS+placebo (water), No intervention                                       | PIPP                              | ..           |
| Stevens 1999 <sup>174</sup>       | 106 | Canada           | RCT, XG | HP      | LA, Placebo                                                                        | HR, SpO <sub>2</sub> , PIPP       | 4·1[0·6]     |
| Stevens 2018 <sup>175</sup>       | 236 | Canada           | RCT, PG | HP      | OS (0.1 mL, 0.5 mL, 1.0 mL)+NNS                                                    | PIPP                              | 8·3          |

|                                      |     |        |         |             |                                               |                             |            |
|--------------------------------------|-----|--------|---------|-------------|-----------------------------------------------|-----------------------------|------------|
| Suhrabi 2014 <sup>86</sup>           | 90  | Iran   | RCT, PG | IMI         | OS (sucrose, glucose), No intervention        | NIPS                        | ..         |
| Sujatha 2017 <sup>176</sup>          | 155 | India  | RCT, PG | IMI         | SW, OS+SW                                     | SpO <sub>2</sub> , NIPS     | ..         |
| Taddio 2008 <sup>87</sup>            | 240 | Canada | RCT, PG | IMI, VP, HP | OS, Placebo                                   | PIPP                        | 0·04[0·01] |
| Taddio 2011 <sup>177</sup>           | 321 | Canada | RCT, PG | VP          | OS+LA, LA+Placebo (water), OS+Placebo (cream) | HR, SpO <sub>2</sub>        | ..         |
| Thakkar 2016 <sup>88</sup>           | 180 | India  | RCT, PG | HP          | OS, NNS, OS+NNS, No intervention              | PIPP                        | ..         |
| Tutag Lehr 2015 <sup>89</sup>        | 56  | USA    | RCT, PG | HP          | OS, Placebo                                   | NIPS                        | ..         |
| Upadhyay 2004 <sup>102</sup>         | 81  | India  | RCT, PG | VP          | EBM, Placebo                                  | HR, SpO <sub>2</sub> , NFCS | 8·8[5·0]   |
| Uyan 2005 <sup>103</sup>             | 62  | Turkey | RCT, PG | HP          | EBM (foremilk, hind milk), Placebo            | HR                          | 6·3[1·1]   |
| Uzelli 2015 <sup>90</sup>            | 80  | Turkey | RCT, PG | IMI         | OS, No intervention                           | SpO <sub>2</sub> , NIPS     | 22·3[0·7]  |
| Yilmaz 2011 <sup>91</sup>            | 120 | Turkey | RCT, PG | HP          | OS, EBM, NNS, No intervention                 | HR, NIPS                    | 3·4[0·4]   |
| Zargham-Boroujeni 2017 <sup>32</sup> | 75  | Iran   | RCT, PG | VP          | BF, No intervention                           | NIPS                        | ..         |
| Zhu 2015 <sup>33</sup>               | 250 | China  | RCT, PG | HP          | BF, M, BF+M, No intervention                  | NIPS                        | 3·3[0·3]   |

PG = parallel groups, XG - crossover groups, RCT = randomised controlled trials, PG = parallel groups, XG = crossover groups, VP = venepuncture, HP = heel prick, IMI = IM injection, LP = lumbar puncture, PICC = PICC line insertion, CPAP = CPAP prongs insertion, BC = bladder catheterisation, SC = subcutaneous injection, VC = vaccination, OS = oral sugar, BF = breastfeeding, EBM = expressed breast milk, NNS = non-nutritive sucking, SS = skin-to-skin, SW = swaddling, LA = topical local anaesthetic, PCM = paracetamol, M = music

\*Reported where available, or where available data could be converted to a mean and standard deviation for the study population using previously described methodology.<sup>1-3</sup>

1. Hozo S.P., Djulbegovic B, Hozo I. Estimating the mean and variance from the median, range, and the size of a sample. *BMC Med Res Methodol.* 2005;**5**,13
2. Wan X, Wang W, Liu J, Tong T. Estimating the sample mean and standard deviation from the sample size, median, range and/or interquartile range. *BMC Med Res Methodol.* 2014;**14**:135
3. Bornstein M, Hedges L.V, Higgins J.P.T, Rothstein H. (2009) "Introduction to Meta-Analysis" Print ISBN:9780470057247 Copyright © 2009 John Wiley & Sons, Ltd

**Supplementary Table 4: Panel’s GRADE summary of evidence table for PICO questions discussed in Results**

| PICO:<br>In neonates ≤ 28 days, which of the following is superior in reducing pain during routine procedures? | Studies | Neonates | Bias | Inconsistency | Indirectness | Imprecision | Summary                                       | Certainty† |
|----------------------------------------------------------------------------------------------------------------|---------|----------|------|---------------|--------------|-------------|-----------------------------------------------|------------|
|                                                                                                                |         |          |      |               |              |             |                                               |            |
| BF versus placebo/no intervention                                                                              | 12      | 991      |      |               |              |             | BF is superior to placebo/no intervention**   | ⊕⊕⊕⊕       |
| BF versus OS                                                                                                   | 8       | 670      |      |               |              |             | BF is superior to OS**                        | ⊕⊕○○       |
| BF versus EBM                                                                                                  | 3       | 136      |      |               |              |             | BF is superior to EBM                         | ⊕⊕⊕○       |
| BF versus SS                                                                                                   | 2       | 160      |      |               |              |             | BF is superior to SS**                        | ⊕⊕⊕○       |
| EBM versus placebo/no intervention                                                                             | 14      | 863      |      |               |              |             | EBM is superior to placebo/no intervention ** | ⊕⊕⊕○       |
| EBM versus OS                                                                                                  | 14      | 920      |      |               |              |             | EBM is inferior to OS ≥10%.                   | ⊕⊕⊕○       |
| OS versus placebo/no intervention                                                                              | 58      | 3948     |      |               |              |             | OS is superior to placebo/no intervention**   | ⊕⊕⊕⊕       |
| OS versus NNS                                                                                                  | 11      | 645      |      |               |              |             | OS is superior to NNS                         | ⊕⊕○○       |
| OS versus OS with NNS                                                                                          | 10      | 837      |      |               |              |             | OS is inferior to OS with NNS                 | ⊕⊕⊕○       |
| OS: concentration ≥24% versus <24% <sup>1</sup>                                                                | 6*      | 453      |      |               |              |             | OS ≥24% is superior to <24% solution          | ⊕⊕⊕○       |
| OS: concentration 24-25% versus 50% <sup>1</sup>                                                               | 3*      | 110      |      |               |              |             | OS 24-25% may not be inferior OS 50%          | ⊕○○○       |
| OS: volume ≤2 mL versus >2 mL <sup>2</sup>                                                                     | *       | ..       |      |               |              |             | Volumes >2 mL do not increase efficacy        | ⊕⊕⊕○       |
| Sucrose, glucose, dextrose, fructose versus sweeteners <sup>3</sup>                                            | *       | ..       |      |               |              |             | None are clearly superior to the others       | ⊕⊕⊕○       |
| SS versus placebo/no intervention                                                                              | 16      | 1054     |      |               |              |             | SS is superior to placebo/no intervention**   | ⊕⊕⊕⊕       |
| NNS versus placebo/no intervention                                                                             | 16      | 932      |      |               |              |             | NNS is superior to placebo/no intervention ** | ⊕⊕⊕○       |
| NNS versus NNS with OS                                                                                         | 4       | 192      |      |               |              |             | NNS is inferior to NNS with OS**              | ⊕⊕⊕⊕       |

BF: Breastfeeding; OS: Oral sugar; EBM: Expressed breastmilk; NNS: Non-nutritive sucking; SS: Skin-to-skin

Notes:

1. Oral sugar concentration: range = 5-50%, median: 25%. The concentrations directly compared varied. We grouped according to <24%, ≥24% and 50%.

2. Volume: range= 0.05-5 mL, median=2 mL

3. Sucrose (number of studies (#) = 52), glucose (#=33), dextrose (#=8), sweetener (#=2) fructose (#=1))

\* No/few direct comparative studies, therefore indirect analysis across whole data set performed.

\*\* Quantitative analysis of any one of the outcome measures supports conclusion with 95% confidence

† The GRADE framework also allows for “Other Considerations” to determine the overall certainty in effect estimate.

|     | Risk of bias |         |              | Certainty of conclusion using GRADE analysis |                  |             |                  |
|-----|--------------|---------|--------------|----------------------------------------------|------------------|-------------|------------------|
| KEY | Not serious  | Serious | Very serious | ⊕⊕⊕⊕<br>High                                 | ⊕⊕⊕○<br>Moderate | ⊕⊕○○<br>Low | ⊕○○○<br>Very low |



**Supplementary Table 5. Summary of narrative synthesis findings with associated references showing superiority, equivalence or inferiority of the analgesic versus the comparator as described in the Results**

| PICO                  |                            | Analgesic versus Comparator                                                                                                                           |                         |          |
|-----------------------|----------------------------|-------------------------------------------------------------------------------------------------------------------------------------------------------|-------------------------|----------|
| Analgesic             | Comparator                 | Superior                                                                                                                                              | Equivalence             | Inferior |
| Breastfeeding         | Placebo or no intervention | 22,23,24,25,26,27,28,29,30,31,32,33                                                                                                                   | ..                      | ..       |
| Breastfeeding         | Oral sugar                 | 24,34,35,36,37                                                                                                                                        | 38,39                   | 40       |
| Breastfeeding         | Expressed breast milk      | 27,34                                                                                                                                                 | ..                      | 39       |
| Breastfeeding         | Skin-to-skin               | 37,41                                                                                                                                                 | ..                      | ..       |
| Oral sugar $\geq$ 24% | Oral sugar <24%            | 42,43,44,45,46                                                                                                                                        | ..                      | 47       |
| Oral sugar            | Placebo or no intervention | 24,42,44,45,46,47,48,49,50,51,52,53,54,55,56,57,58,59,60,61,62,63,64,65,66,67,68,69,70,71,72,73,74,75,76,77,78,79,80,81,82,83,84,85,86,87,88,89,90,91 | 92,93,94,95,96,97,98,99 | ..       |
| Oral sugar            | Expressed breast milk      | 45,46,76,77,79,81,83,91,100                                                                                                                           | 34,39,53,72,99          |          |
| Oral sugar            | Non-nutritive sucking      | 91,101                                                                                                                                                | 61,64,70,88,92,98       | 58,71,72 |
| Expressed breast milk | Placebo or no intervention | 45,53,76,77,81,83,91,99,102                                                                                                                           | 27,46,72,79,103         | ..       |
| Skin-to-skin          | Placebo or no intervention | 43,94,104,105,106,107,108,109,110,111,112,113,114,115,116,                                                                                            | 117                     | ..       |
| Non-nutritive sucking | Placebo or no intervention | 29,56,58,61,64,70,71,72,88,91,98,118,119,120,121                                                                                                      | 122                     | ..       |

**Supplementary Table 6. Panel's GRADE summary of evidence table for PICO's not discussed in Results**

| PICO:<br>In neonates ≤ 28 days, which of the following is superior in reducing pain during routine, acutely painful procedures? | Studies | Neonates | Bias | Inconsistency | Indirectness | Imprecision | Summary                                               | Certainty† |
|---------------------------------------------------------------------------------------------------------------------------------|---------|----------|------|---------------|--------------|-------------|-------------------------------------------------------|------------|
|                                                                                                                                 |         |          |      |               |              |             |                                                       |            |
| BF versus swaddling                                                                                                             | 3       | 243      | ⊕    | ⊕             | ⊕            | ⊕           | BF may not be inferior to swaddling                   | ⊕○○○       |
| BF versus BF with music                                                                                                         | 1       | 126      | ⊕    | ⊕             | ⊕            | ⊕           | BF is not inferior to BF with music                   | ⊕⊕○○       |
| Sugar versus skin to skin                                                                                                       | 4       | 561      | ⊕    | ⊕             | ⊕            | ⊕           | Sugar may be inferior to skin-to-skin**               | ⊕○○○       |
| Sugar versus LA                                                                                                                 | 7       | 880      | ⊕    | ⊕             | ⊕            | ⊕           | Sugar is superior to LA                               | ⊕⊕⊕⊕       |
| Sugar versus sugar with skin-to-skin                                                                                            | 2       | 387      | ⊕    | ⊕             | ⊕            | ⊕           | Sugar is inferior to sugar with skin-to-skin          | ⊕⊕○○       |
| Sugar versus sugar with LA                                                                                                      | 4       | 335      | ⊕    | ⊕             | ⊕            | ⊕           | Sugar is not inferior to sugar with LA                | ⊕⊕⊕○       |
| Sugar versus sugar with music                                                                                                   | 2       | 115      | ⊕    | ⊕             | ⊕            | ⊕           | Sugar is inferior to sugar with music                 | ⊕⊕○○       |
| Skin-to-skin versus swaddling                                                                                                   | 3       | 255      | ⊕    | ⊕             | ⊕            | ⊕           | Skin-to-skin is no different than swaddling**         | ⊕○○○       |
| NNS versus swaddling                                                                                                            | 2       | 101      | ⊕    | ⊕             | ⊕            | ⊕           | NNS is no different than swaddling                    | ⊕○○○       |
| LA versus placebo/no intervention                                                                                               | 11      | 656      | ⊕    | ⊕             | ⊕            | ⊕           | LA is not superior to placebo/no intervention**       | ⊕⊕○○       |
| LA versus LA with sugar                                                                                                         | 3       | 256      | ⊕    | ⊕             | ⊕            | ⊕           | LA is not inferior to LA with sugar                   | ⊕⊕⊕○       |
| Swaddling versus placebo/no intervention                                                                                        | 8       | 410      | ⊕    | ⊕             | ⊕            | ⊕           | Swaddling is not superior to placebo/no intervention  | ⊕⊕○○       |
| Swaddling versus swaddling with BF or NNS                                                                                       | 2       | 197      | ⊕    | ⊕             | ⊕            | ⊕           | Swaddling is not inferior to swaddling with BF or NNS | ⊕○○○       |
| Music versus placebo/no intervention                                                                                            | 6       | 487      | ⊕    | ⊕             | ⊕            | ⊕           | Music is not superior to placebo/no intervention**    | ⊕⊕○○       |

BF = breastfeeding, LA = topical local anaesthetics, NNS = non-nutritive sucking.

\*\* Quantitative analysis of any of the outcome measures supports conclusion with 95% confidence threshold

† The GRADE framework also allows for “Other Considerations” to determine the overall certainty in effect estimate.

|     | Risk of bias |         |              | Certainty of conclusion using GRADE analysis |               |          |               |
|-----|--------------|---------|--------------|----------------------------------------------|---------------|----------|---------------|
| KEY | Not serious  | Serious | Very serious | ⊕⊕⊕⊕ High                                    | ⊕⊕⊕○ Moderate | ⊕⊕○○ Low | ⊕○○○ Very low |

**Supplementary Table 7. Table counting the number of the 149 studies, which studied the following procedures, analgesics and outcome measures**

| Procedures              | n  | Analgesics                | n  | Outcome measures                        | n  |
|-------------------------|----|---------------------------|----|-----------------------------------------|----|
| Heel prick              | 88 | Oral sugar                | 78 | Heart rate                              | 76 |
| Venipuncture/cannula    | 40 | Skin-to-skin              | 22 | Transcutaneous oxygen saturation        | 49 |
| IM/SC injection         | 19 | Breast feeding            | 21 | Premature infant pain profile (PIPP)    | 57 |
| Arteripuncture          | 4  | Expressed breast milk     | 19 | Neonatal facial coding system (NFCS)    | 22 |
| CPAP prongs insertion   | 1  | Non-nutritive sucking     | 19 | Neonatal infant pain scale (NIPS)       | 32 |
| Urinary catheterisation | 1  | Topical local anaesthesia | 13 | Douleur Aigue du Nouveau-ne scale (DAN) | 12 |
| Lumbar puncture         | 1  | Swaddling                 | 15 |                                         |    |
| ..                      | .. | Music                     | 9  |                                         |    |
| ..                      | .. | Paracetamol               | 1  |                                         |    |

**Supplementary Table 8. Table of each component judged for Cochrane risk of bias for each study included in analysis**

|                                    | Sequence Generation | Allocation concealment | Blinding of participants and personnel | Blinding of outcome assessors | Incomplete outcome data | Selective outcome reporting | Other sources of bias | Overall judgement of study risk of bias |
|------------------------------------|---------------------|------------------------|----------------------------------------|-------------------------------|-------------------------|-----------------------------|-----------------------|-----------------------------------------|
| Abad 1996 <sup>42</sup>            |                     |                        |                                        |                               |                         |                             |                       |                                         |
| Abad 2001 <sup>48</sup>            |                     |                        |                                        |                               |                         |                             |                       |                                         |
| Acharva 1998 <sup>130</sup>        |                     |                        |                                        |                               |                         |                             |                       |                                         |
| Acharva 2004 <sup>49</sup>         |                     |                        |                                        |                               |                         |                             |                       |                                         |
| Ahuja 2000 <sup>50</sup>           |                     |                        |                                        |                               |                         |                             |                       |                                         |
| Akcam 2004 <sup>51</sup>           |                     |                        |                                        |                               |                         |                             |                       |                                         |
| Akcam 2004 <sup>52</sup>           |                     |                        |                                        |                               |                         |                             |                       |                                         |
| Altun-Koroglu 2010 <sup>53</sup>   |                     |                        |                                        |                               |                         |                             |                       |                                         |
| Aydin 2019 <sup>22</sup>           |                     |                        |                                        |                               |                         |                             |                       |                                         |
| Badiee 2009 <sup>131</sup>         |                     |                        |                                        |                               |                         |                             |                       |                                         |
| Basnet 2010 <sup>54</sup>          |                     |                        |                                        |                               |                         |                             |                       |                                         |
| Bauer 2004 <sup>55</sup>           |                     |                        |                                        |                               |                         |                             |                       |                                         |
| Beken 2014 <sup>132</sup>          |                     |                        |                                        |                               |                         |                             |                       |                                         |
| Belliemi 2001 <sup>56</sup>        |                     |                        |                                        |                               |                         |                             |                       |                                         |
| Belliemi 2002 <sup>92</sup>        |                     |                        |                                        |                               |                         |                             |                       |                                         |
| Belliemi 2013 <sup>133</sup>       |                     |                        |                                        |                               |                         |                             |                       |                                         |
| Bembich 2018 <sup>34</sup>         |                     |                        |                                        |                               |                         |                             |                       |                                         |
| Biran 2011 <sup>134</sup>          |                     |                        |                                        |                               |                         |                             |                       |                                         |
| Blass 1999 <sup>57</sup>           |                     |                        |                                        |                               |                         |                             |                       |                                         |
| Brovedani 2007 <sup>38</sup>       |                     |                        |                                        |                               |                         |                             |                       |                                         |
| Bucher 1995 <sup>135</sup>         |                     |                        |                                        |                               |                         |                             |                       |                                         |
| Bueno 2012 <sup>100</sup>          |                     |                        |                                        |                               |                         |                             |                       |                                         |
| Butt 2000 <sup>136</sup>           |                     |                        |                                        |                               |                         |                             |                       |                                         |
| Campos 1989 <sup>137</sup>         |                     |                        |                                        |                               |                         |                             |                       |                                         |
| Carbajal 1999 <sup>58</sup>        |                     |                        |                                        |                               |                         |                             |                       |                                         |
| Carbajal 2002 <sup>59</sup>        |                     |                        |                                        |                               |                         |                             |                       |                                         |
| Carbajal 2003 <sup>23</sup>        |                     |                        |                                        |                               |                         |                             |                       |                                         |
| Cardoso 2014 <sup>93</sup>         |                     |                        |                                        |                               |                         |                             |                       |                                         |
| Castral 2008 <sup>104</sup>        |                     |                        |                                        |                               |                         |                             |                       |                                         |
| Chermont 2009 <sup>94</sup>        |                     |                        |                                        |                               |                         |                             |                       |                                         |
| Chiabi 2016 <sup>35</sup>          |                     |                        |                                        |                               |                         |                             |                       |                                         |
| Codipietro 2008 <sup>36</sup>      |                     |                        |                                        |                               |                         |                             |                       |                                         |
| Collados-Gomez 2018 <sup>138</sup> |                     |                        |                                        |                               |                         |                             |                       |                                         |
| Cong 2009 <sup>105</sup>           |                     |                        |                                        |                               |                         |                             |                       |                                         |
| Cong 2011 <sup>106</sup>           |                     |                        |                                        |                               |                         |                             |                       |                                         |
| Cong 2012 <sup>107</sup>           |                     |                        |                                        |                               |                         |                             |                       |                                         |
| Cook 2017 <sup>95</sup>            |                     |                        |                                        |                               |                         |                             |                       |                                         |
| Corbo 2000 <sup>122</sup>          |                     |                        |                                        |                               |                         |                             |                       |                                         |
| DeBernardo 2019 <sup>139</sup>     |                     |                        |                                        |                               |                         |                             |                       |                                         |
| DeMelo 2017 <sup>140</sup>         |                     |                        |                                        |                               |                         |                             |                       |                                         |
| Deshmukh 2002 <sup>60</sup>        |                     |                        |                                        |                               |                         |                             |                       |                                         |
| Dezhdar 2016 <sup>43</sup>         |                     |                        |                                        |                               |                         |                             |                       |                                         |
| Elserafv 2009 <sup>61</sup>        |                     |                        |                                        |                               |                         |                             |                       |                                         |
| Eriksson 1999 <sup>62</sup>        |                     |                        |                                        |                               |                         |                             |                       |                                         |
| Eriksson 2004 <sup>63</sup>        |                     |                        |                                        |                               |                         |                             |                       |                                         |
| Erkut 2017 <sup>141</sup>          |                     |                        |                                        |                               |                         |                             |                       |                                         |

|                                   |  |  |  |  |  |  |  |  |
|-----------------------------------|--|--|--|--|--|--|--|--|
| Fallah 2017 <sup>41</sup>         |  |  |  |  |  |  |  |  |
| Field 1984 <sup>118</sup>         |  |  |  |  |  |  |  |  |
| Gaibhivie 2018 <sup>24</sup>      |  |  |  |  |  |  |  |  |
| Gao 2015 <sup>117</sup>           |  |  |  |  |  |  |  |  |
| Gao 2018 <sup>64</sup>            |  |  |  |  |  |  |  |  |
| Gerull 2013 <sup>142</sup>        |  |  |  |  |  |  |  |  |
| Gharehbaghi 2007 <sup>65</sup>    |  |  |  |  |  |  |  |  |
| Gibbins 2002 <sup>143</sup>       |  |  |  |  |  |  |  |  |
| Golestan 2007 <sup>96</sup>       |  |  |  |  |  |  |  |  |
| Gormally 2001 <sup>97</sup>       |  |  |  |  |  |  |  |  |
| Gradin 2002 <sup>144</sup>        |  |  |  |  |  |  |  |  |
| Gradin 2004 <sup>66</sup>         |  |  |  |  |  |  |  |  |
| Grav 2000 <sup>108</sup>          |  |  |  |  |  |  |  |  |
| Gray 2002 <sup>25</sup>           |  |  |  |  |  |  |  |  |
| Gray 2012 <sup>98</sup>           |  |  |  |  |  |  |  |  |
| Haouari 1995 <sup>44</sup>        |  |  |  |  |  |  |  |  |
| Harrison 2003 <sup>67</sup>       |  |  |  |  |  |  |  |  |
| Hashemi 2016 <sup>26</sup>        |  |  |  |  |  |  |  |  |
| HatamiBavarsad 2018 <sup>27</sup> |  |  |  |  |  |  |  |  |
| Ho 2016 <sup>145</sup>            |  |  |  |  |  |  |  |  |
| Holsti 2011 <sup>146</sup>        |  |  |  |  |  |  |  |  |
| Hsieh 2018 <sup>99</sup>          |  |  |  |  |  |  |  |  |
| Huang 2004 <sup>147</sup>         |  |  |  |  |  |  |  |  |
| Jain 2000 <sup>148</sup>          |  |  |  |  |  |  |  |  |
| Jatana 2003 <sup>45</sup>         |  |  |  |  |  |  |  |  |
| Johnston 1997 <sup>68</sup>       |  |  |  |  |  |  |  |  |
| Johnston 1999 <sup>69</sup>       |  |  |  |  |  |  |  |  |
| Johnston 2003 <sup>109</sup>      |  |  |  |  |  |  |  |  |
| Johnston 2008 <sup>149</sup>      |  |  |  |  |  |  |  |  |
| Kashaninia 2008 <sup>110</sup>    |  |  |  |  |  |  |  |  |
| Kaur 2003 <sup>150</sup>          |  |  |  |  |  |  |  |  |
| Kristoffersen 2018 <sup>151</sup> |  |  |  |  |  |  |  |  |
| KurdahiBadr 2017 <sup>152</sup>   |  |  |  |  |  |  |  |  |
| Larsson 1998 <sup>153</sup>       |  |  |  |  |  |  |  |  |
| Leite 2009 <sup>28</sup>          |  |  |  |  |  |  |  |  |
| Lemvre 2007 <sup>154</sup>        |  |  |  |  |  |  |  |  |
| Leng 2016 <sup>155</sup>          |  |  |  |  |  |  |  |  |
| Liaw 2010 <sup>119</sup>          |  |  |  |  |  |  |  |  |
| Liaw 2011 <sup>70</sup>           |  |  |  |  |  |  |  |  |
| Liaw 2012 <sup>120</sup>          |  |  |  |  |  |  |  |  |
| Lima 2013 <sup>29</sup>           |  |  |  |  |  |  |  |  |
| Lima 2017 <sup>101</sup>          |  |  |  |  |  |  |  |  |
| Lindh 2000 <sup>156</sup>         |  |  |  |  |  |  |  |  |
| Liu 2010 <sup>71</sup>            |  |  |  |  |  |  |  |  |
| Liu 2015 <sup>111</sup>           |  |  |  |  |  |  |  |  |
| Long 2003 <sup>157</sup>          |  |  |  |  |  |  |  |  |
| Ludington-Hoe 2005 <sup>112</sup> |  |  |  |  |  |  |  |  |
| Marcatto 2011 <sup>158</sup>      |  |  |  |  |  |  |  |  |
| Marin Gabriel 2013 <sup>159</sup> |  |  |  |  |  |  |  |  |
| Marofi 2015 <sup>160</sup>        |  |  |  |  |  |  |  |  |
| Mathai 2006 <sup>72</sup>         |  |  |  |  |  |  |  |  |
| Milazzo 2011 <sup>73</sup>        |  |  |  |  |  |  |  |  |
| Mirzarahimi 2013 <sup>121</sup>   |  |  |  |  |  |  |  |  |
| Morrow 2010 <sup>161</sup>        |  |  |  |  |  |  |  |  |
| Mosavebi 2014 <sup>162</sup>      |  |  |  |  |  |  |  |  |
| Nimbalkar 2013 <sup>113</sup>     |  |  |  |  |  |  |  |  |
| NooriShadkam 2008 <sup>163</sup>  |  |  |  |  |  |  |  |  |
| Obeidat 2015 <sup>30</sup>        |  |  |  |  |  |  |  |  |
| Ogawa 2005 <sup>74</sup>          |  |  |  |  |  |  |  |  |
| Okan 2007 <sup>75</sup>           |  |  |  |  |  |  |  |  |
| Okan 2010 <sup>114</sup>          |  |  |  |  |  |  |  |  |
| Olsson 2016 <sup>115</sup>        |  |  |  |  |  |  |  |  |
| Örs 1999 <sup>76</sup>            |  |  |  |  |  |  |  |  |

|                                      |  |  |  |  |  |  |  |  |
|--------------------------------------|--|--|--|--|--|--|--|--|
| Ou-Yang 2013 <sup>77</sup>           |  |  |  |  |  |  |  |  |
| Overgaard 1999 <sup>78</sup>         |  |  |  |  |  |  |  |  |
| Ozdogan 2010 <sup>79</sup>           |  |  |  |  |  |  |  |  |
| Patel 2003 <sup>164</sup>            |  |  |  |  |  |  |  |  |
| Peng 2018 <sup>165</sup>             |  |  |  |  |  |  |  |  |
| Ramenghi 1996 <sup>47</sup>          |  |  |  |  |  |  |  |  |
| Ramenghi 1996 <sup>80</sup>          |  |  |  |  |  |  |  |  |
| Rawal 2018 <sup>81</sup>             |  |  |  |  |  |  |  |  |
| Rioualen 2018 <sup>40</sup>          |  |  |  |  |  |  |  |  |
| Rogers 2006 <sup>82</sup>            |  |  |  |  |  |  |  |  |
| Rossi 2018 <sup>166</sup>            |  |  |  |  |  |  |  |  |
| Saeidi 2011 <sup>116</sup>           |  |  |  |  |  |  |  |  |
| Sahoo 2013 <sup>83</sup>             |  |  |  |  |  |  |  |  |
| Sajedi 2006 <sup>84</sup>            |  |  |  |  |  |  |  |  |
| Shabani 2016 <sup>167</sup>          |  |  |  |  |  |  |  |  |
| Shah 2017 <sup>168</sup>             |  |  |  |  |  |  |  |  |
| Shu 2014 <sup>169</sup>              |  |  |  |  |  |  |  |  |
| Shukla 2018 <sup>170</sup>           |  |  |  |  |  |  |  |  |
| Shukla 2018 <sup>171</sup>           |  |  |  |  |  |  |  |  |
| Simonse 2012 <sup>39</sup>           |  |  |  |  |  |  |  |  |
| Singh 2017 <sup>31</sup>             |  |  |  |  |  |  |  |  |
| Skogsdal 1997 <sup>46</sup>          |  |  |  |  |  |  |  |  |
| Slater 2010 <sup>85</sup>            |  |  |  |  |  |  |  |  |
| Soliman 2016 <sup>172</sup>          |  |  |  |  |  |  |  |  |
| Soltani 2018 <sup>37</sup>           |  |  |  |  |  |  |  |  |
| Stevens 1999 <sup>173</sup>          |  |  |  |  |  |  |  |  |
| Stevens 1999 <sup>174</sup>          |  |  |  |  |  |  |  |  |
| Stevens 2018 <sup>175</sup>          |  |  |  |  |  |  |  |  |
| Suhrabi 2014 <sup>86</sup>           |  |  |  |  |  |  |  |  |
| Suiatha 2017 <sup>176</sup>          |  |  |  |  |  |  |  |  |
| Taddio 2008 <sup>87</sup>            |  |  |  |  |  |  |  |  |
| Taddio 2011 <sup>177</sup>           |  |  |  |  |  |  |  |  |
| Thakkar 2016 <sup>88</sup>           |  |  |  |  |  |  |  |  |
| Tutag Lehr 2015 <sup>89</sup>        |  |  |  |  |  |  |  |  |
| Upadhvay 2004 <sup>102</sup>         |  |  |  |  |  |  |  |  |
| Uyan 2005 <sup>103</sup>             |  |  |  |  |  |  |  |  |
| Uzelli 2015 <sup>90</sup>            |  |  |  |  |  |  |  |  |
| Yilmaz 2011 <sup>91</sup>            |  |  |  |  |  |  |  |  |
| Zargham-Boroujeni 2017 <sup>32</sup> |  |  |  |  |  |  |  |  |
| Zhu 2015 <sup>133</sup>              |  |  |  |  |  |  |  |  |

**Legend for Cochrane risk of bias assessment**

|         |  |
|---------|--|
| High    |  |
| Low     |  |
| Unclear |  |

**Supplementary Figure 1: Standardised mean differences and their confidence intervals for the comparison of breastfeeding versus placebo or no intervention for heart rate**

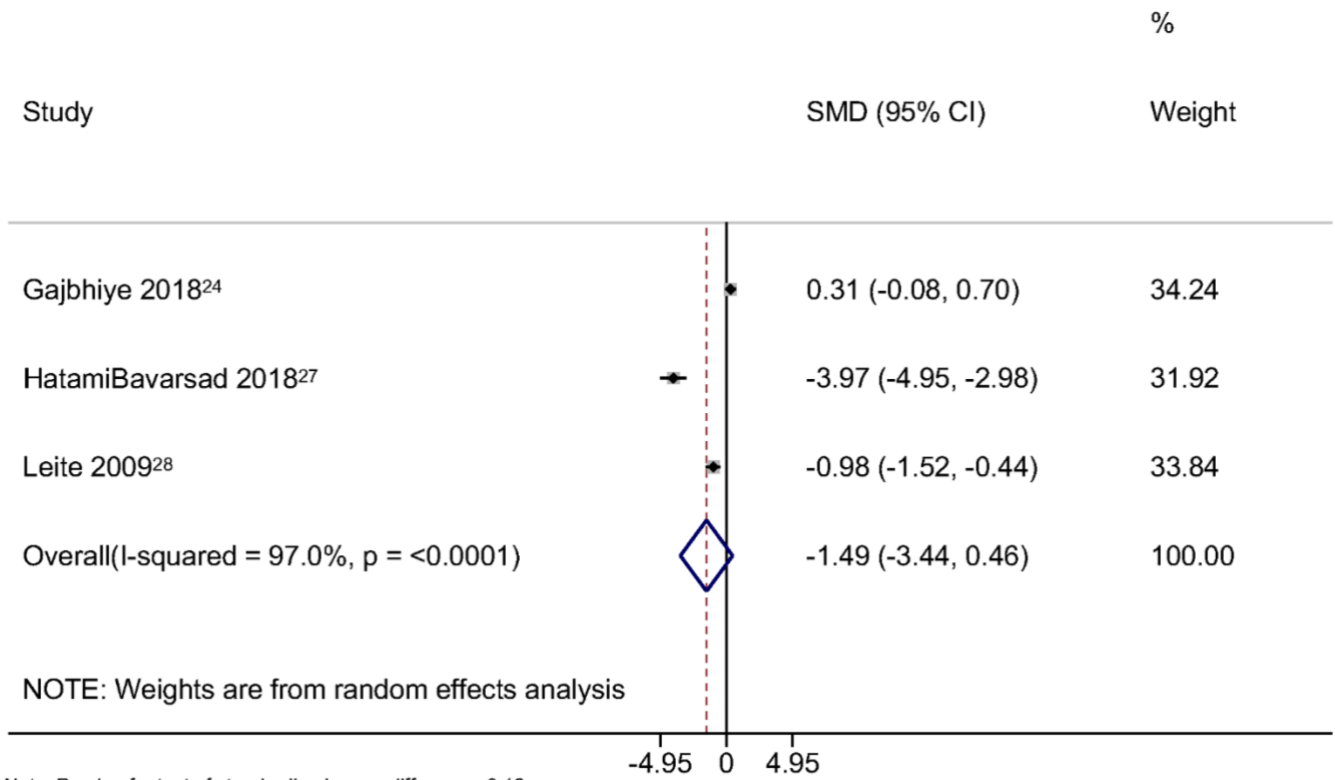

**Supplementary Figure 2: Standardised mean differences and their confidence intervals for the comparison of breastfeeding versus placebo or no intervention for oxygen saturation**

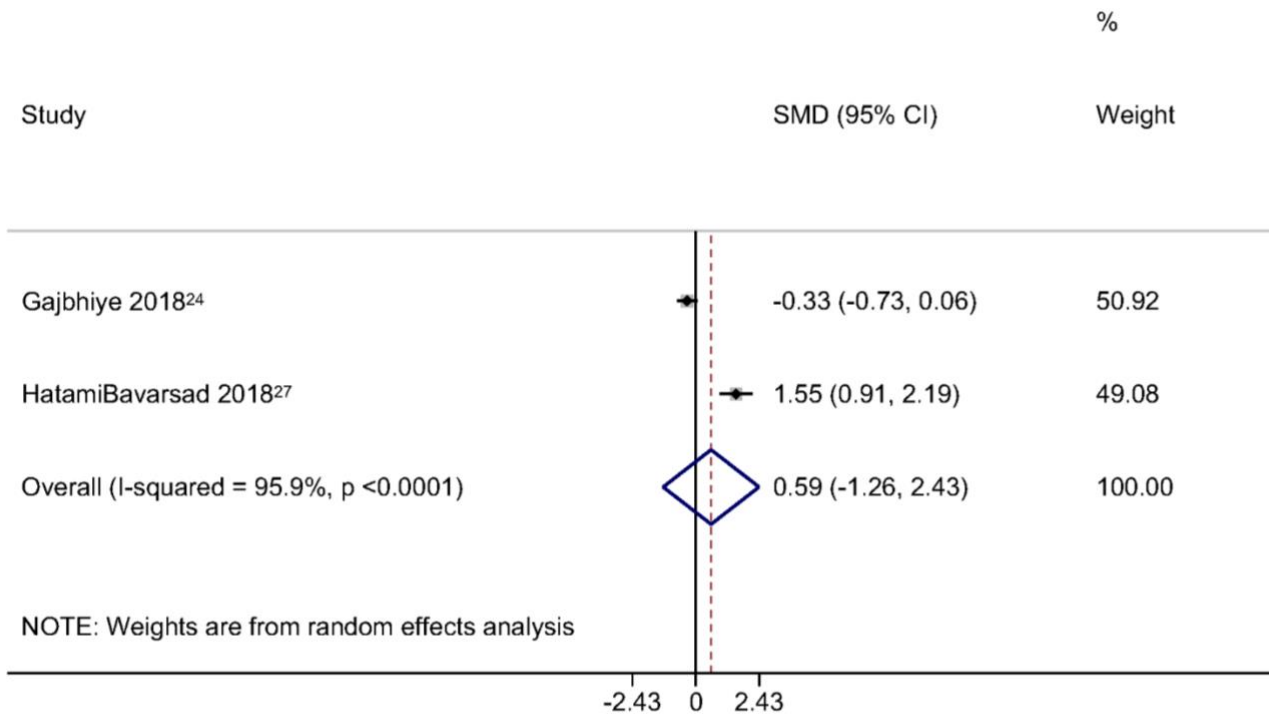

Note: P-value for test of standardised mean difference: 0.53  
 Abbreviations: CI=confidence interval, SMD=standardised mean difference

**Supplementary Figure 3: Standardised mean differences and their confidence intervals for the comparison of breastfeeding versus placebo or no intervention for NIPS**

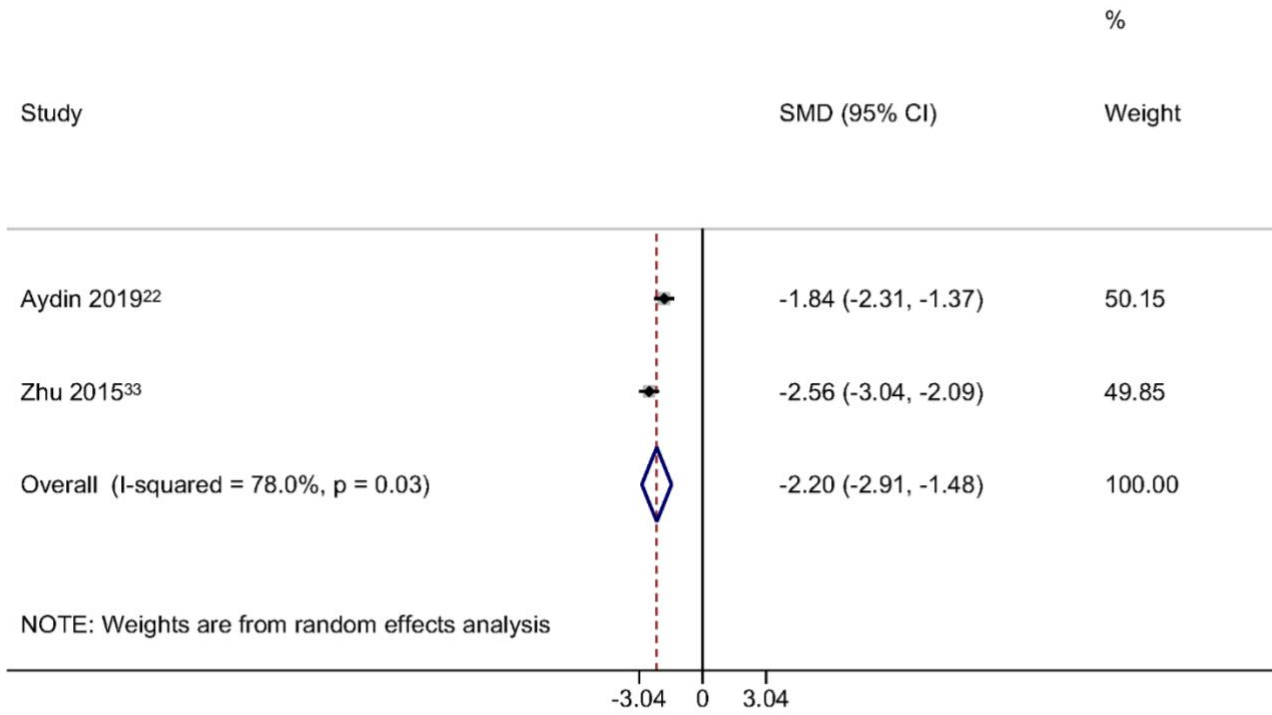

Note: P-value for test of standardised mean difference: < 0.001

Abbreviations: NIPS=Neonatal Infant Pain Scale. CI=confidence interval. SMD=standardised mean difference

**Supplementary Figure 4: Standardised mean differences and their confidence intervals for the comparison of breastfeeding versus oral sugar for PIPP**

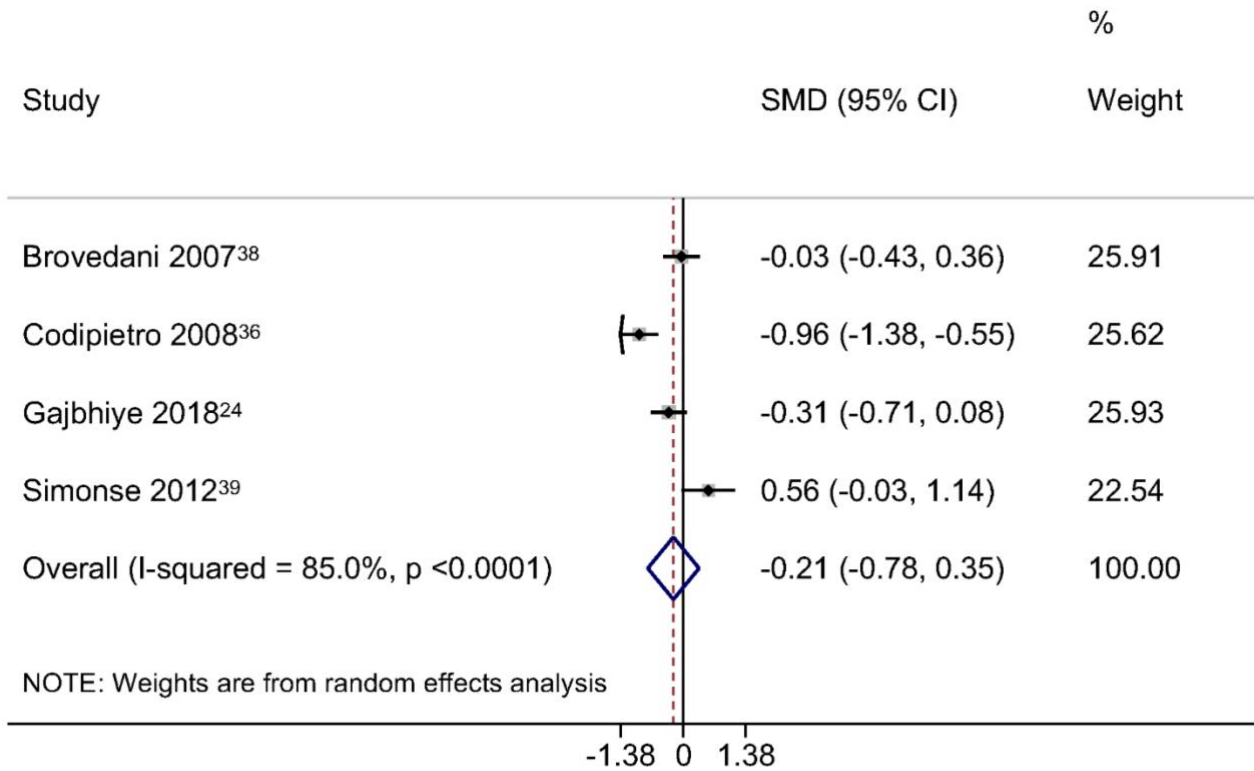

Note: P-value for test of standardised mean difference: 0.46

Abbreviations: CI=confidence interval. SMD=standardised mean difference. PIPP=Premature Infant Pain Profile



**Supplementary Figure 5: Standardised mean differences and their confidence intervals for the comparison of breastfeeding versus oral sugar for NIPS**

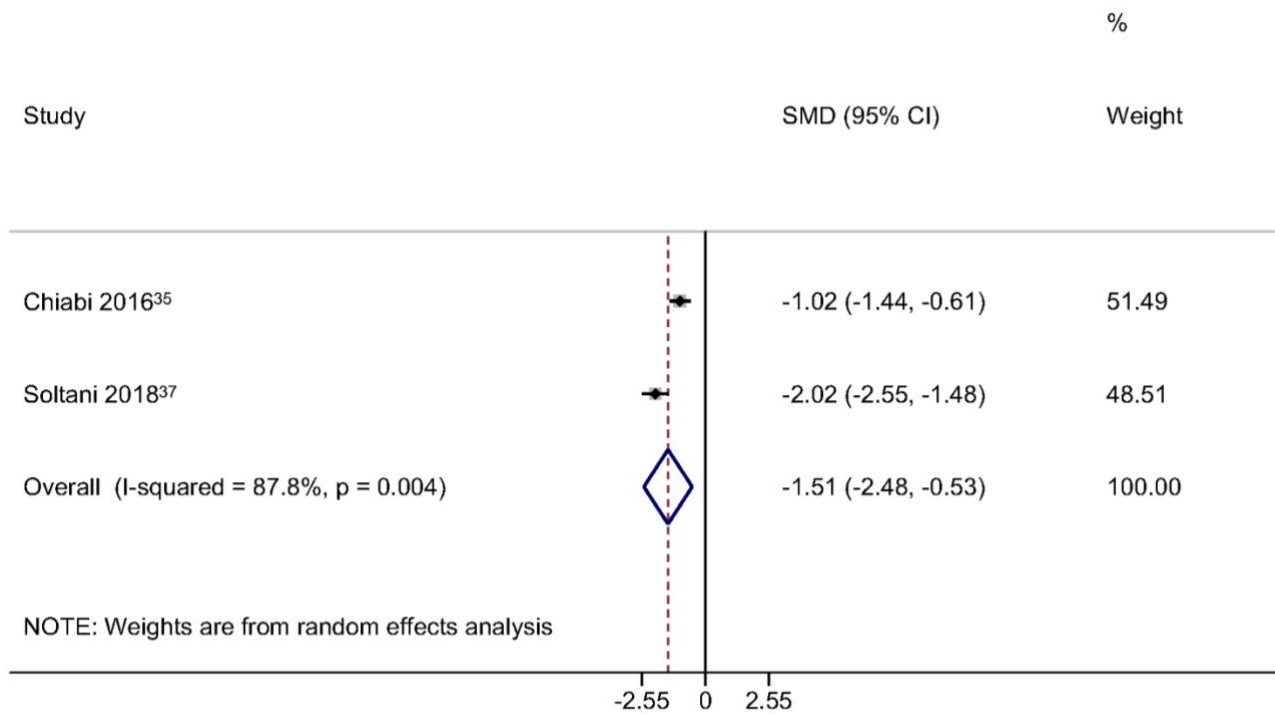

Note: P-value for test of standardised mean difference: 0.002

Abbreviations: CI=confidence interval, SMD=standardised mean difference, NIPS=Neonatal Infant Pain Scale

**Supplementary Figure 6: Standardised mean differences and their confidence intervals for the comparison of breastfeeding versus skin-to-skin for NIPS**

%

Study SMD (95% CI) Weight

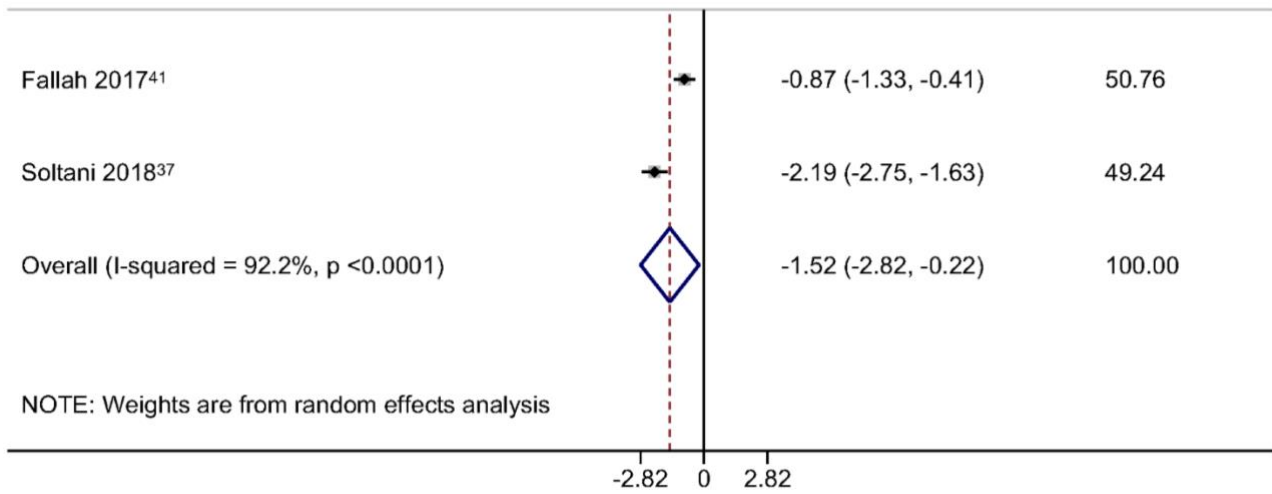

Note: P-value for test of standardised mean difference: 0.02

Abbreviations: CI=confidence interval. SMD=standardised mean difference. NIPS=Neonatal Infant Pain Scale

**Supplementary Figure 7. Standardised mean differences and their confidence intervals for the comparison of oral sugar versus placebo or no intervention for heart rate**

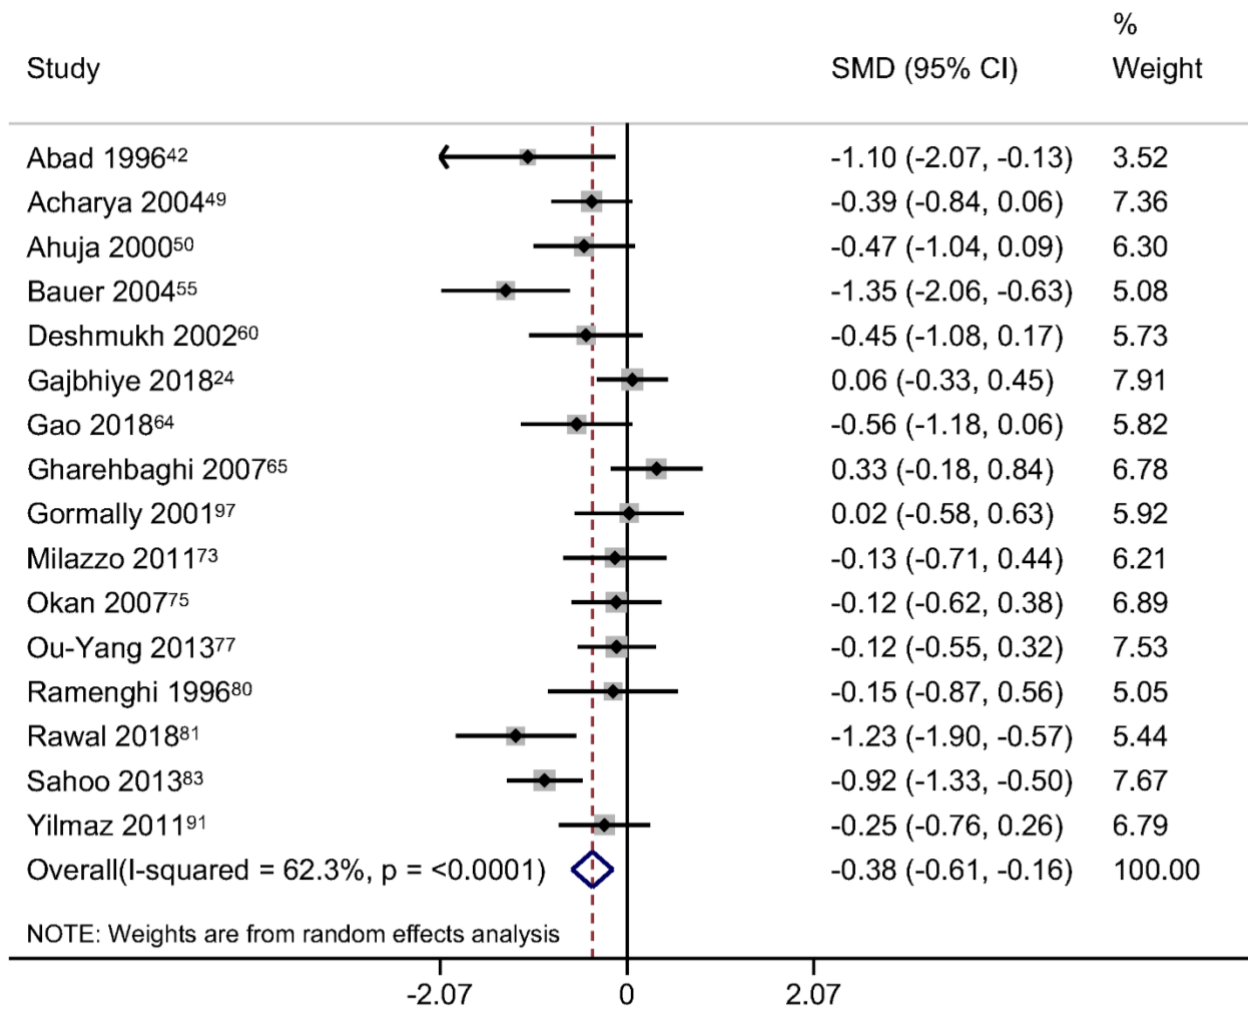

Note: P-value for test of standardised mean difference: 0.001  
 Abbreviations: CI=confidence interval, SMD=standardised mean difference

**Supplementary Figure 8. Standardised mean differences and their confidence intervals for the comparison of oral sugar versus placebo or no intervention for PIPP**

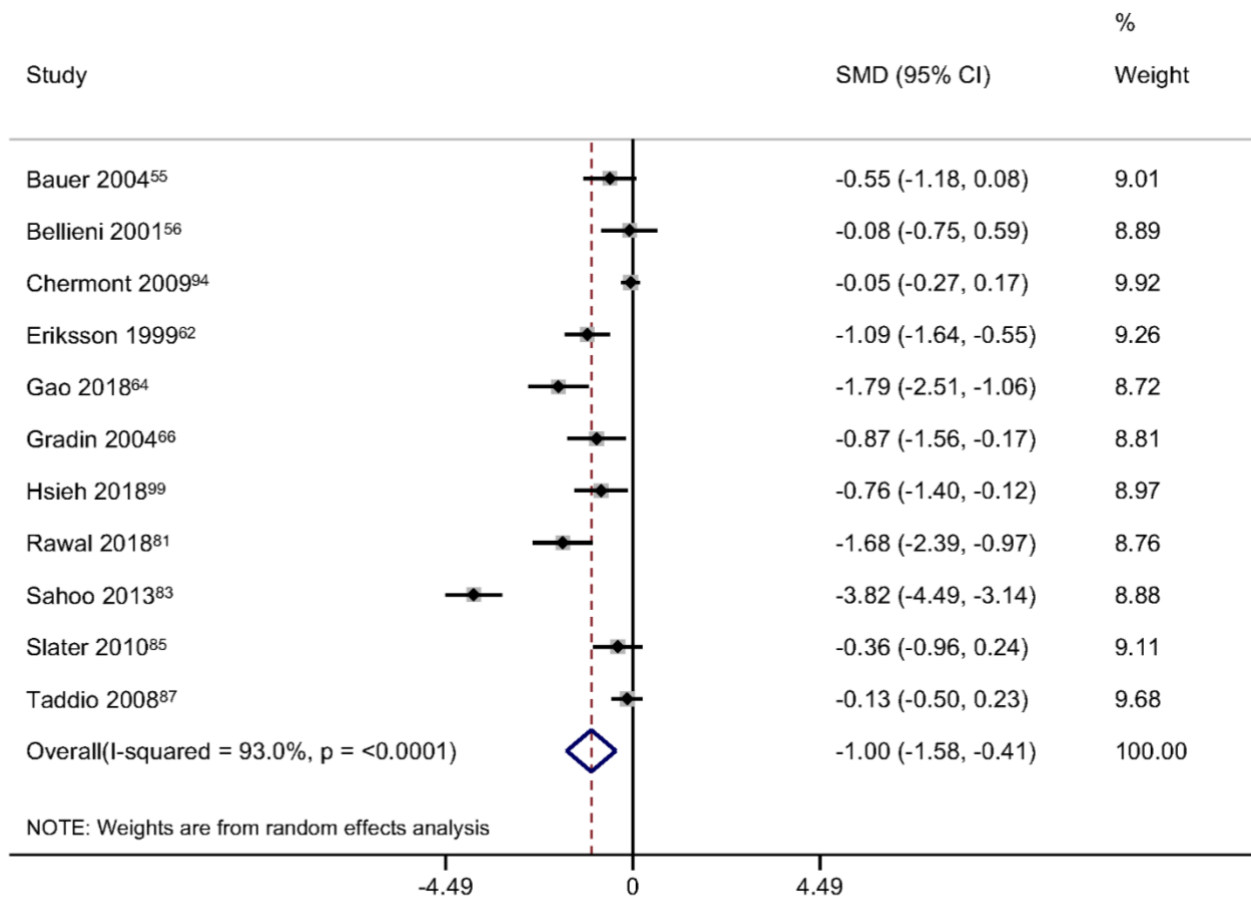

Note: P-value for test of standardised mean difference: 0.001

Abbreviations: CI=confidence interval, SMD=standardised mean difference, PIPP=Premature Infant Pain Profile

**Supplementary Figure 9. Standardised mean differences and their confidence intervals for the comparison of oral sugar versus placebo or no intervention for NIPS**

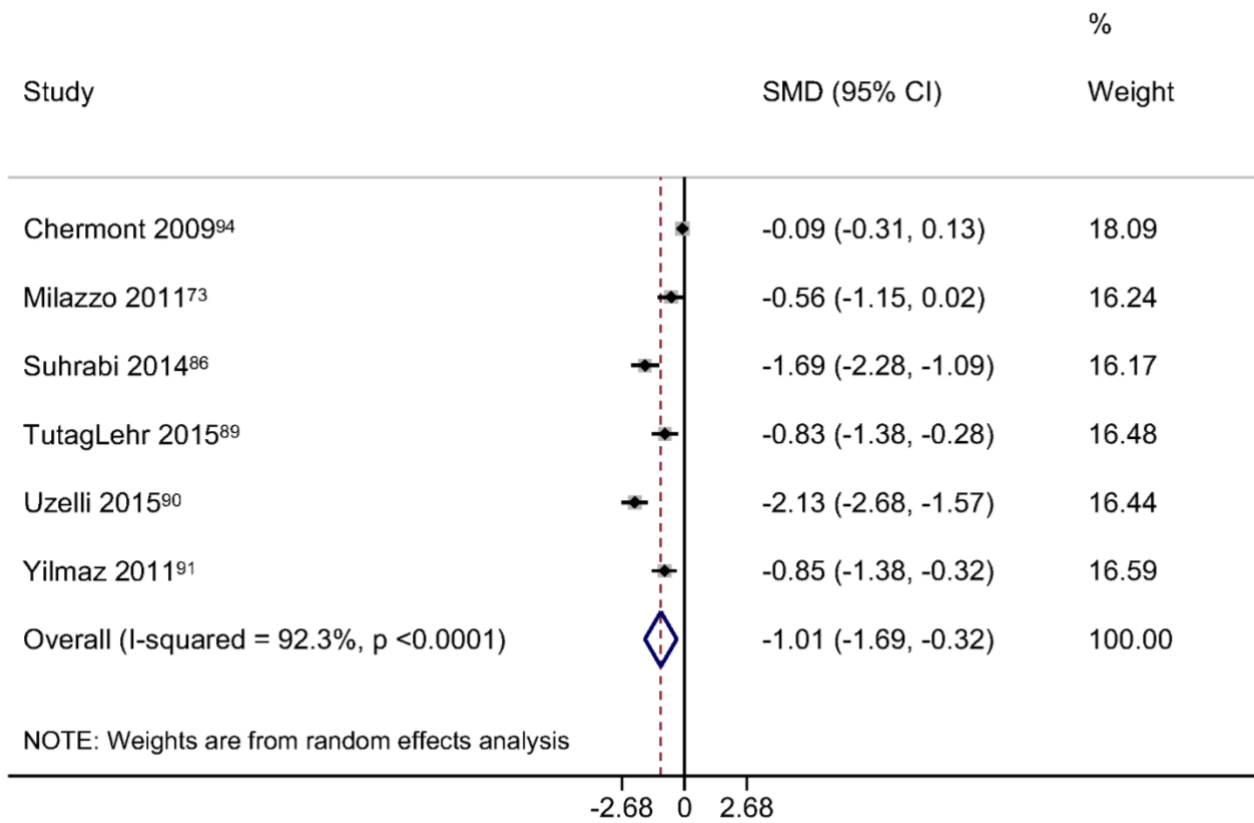

Note: P-value for test of standardised mean difference: 0.004

Abbreviations: CI=confidence interval, SMD=standardised mean difference, NIPS=Neonatal Infant Pain Scale

**Supplementary Figure 10. Standardised mean differences and their confidence intervals for the comparison of oral sugar versus placebo or no intervention for NFCS**

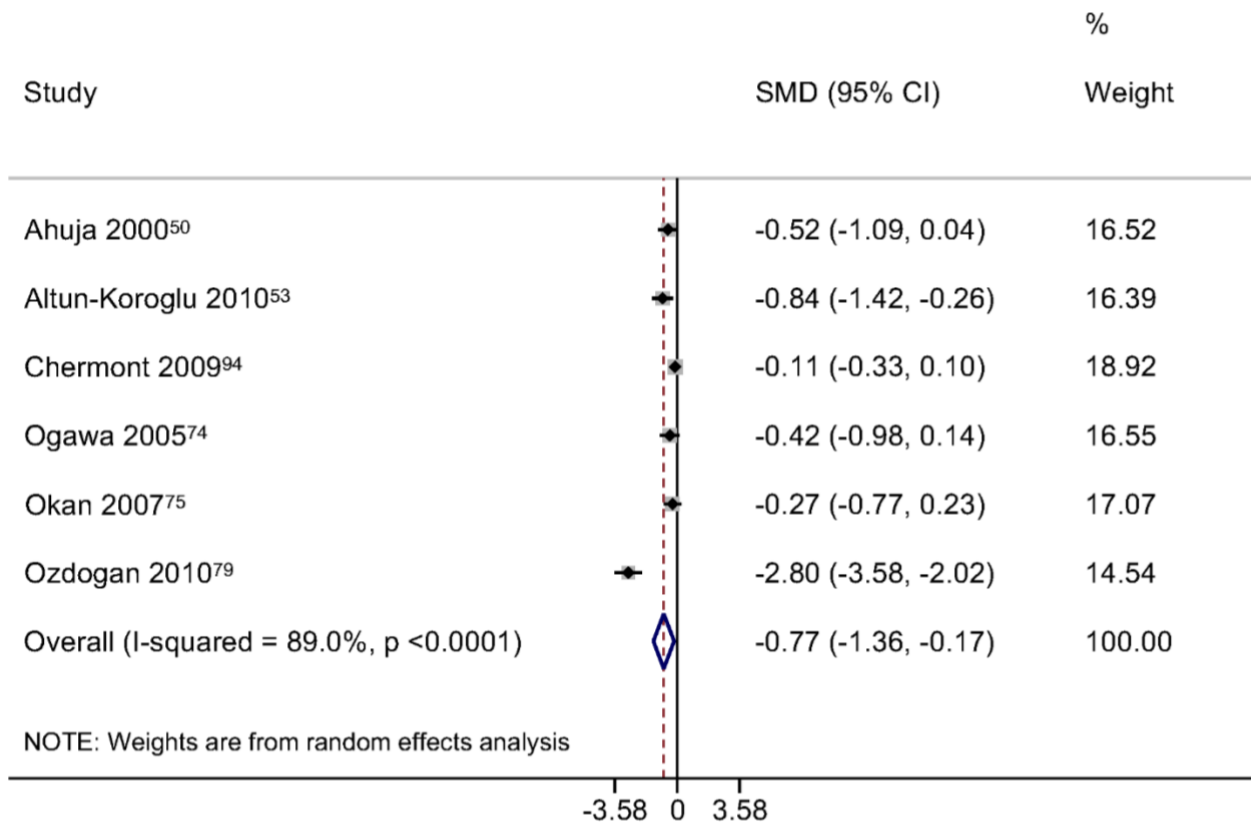

Note: P-value for test of standardised mean difference: 0.01

Abbreviations: CI=confidence interval, SMD=standardised mean difference, NCFS= Neonatal Facial Coding System

**Supplementary Figure 11. Standardised mean differences and their confidence intervals for the comparison of oral sugar versus placebo or no intervention for DAN**

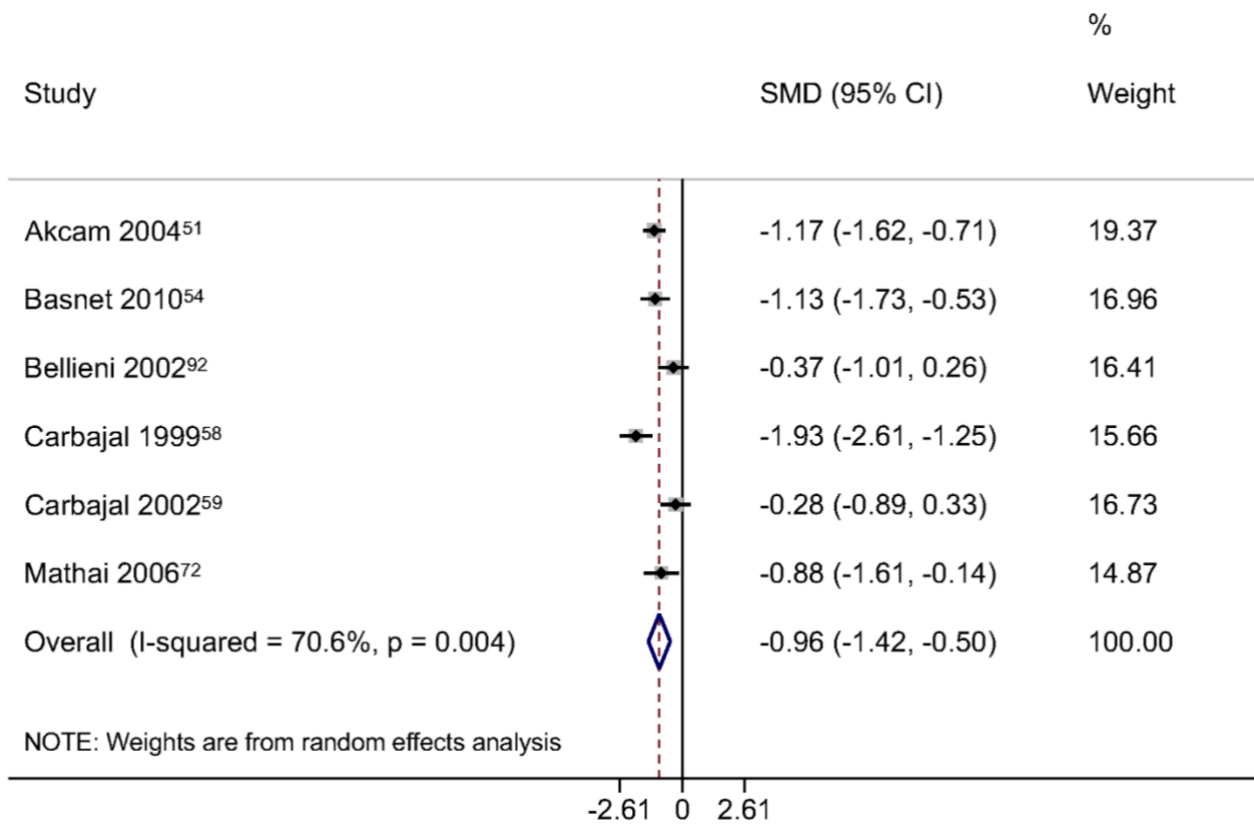

Note: P-value for test of standardised mean difference: p < 0.001

Abbreviations: CI=confidence interval, SMD=standardised mean difference, DAN= Douleur Aigue du Nouveau-né

**Supplementary Figure 12. Standardised mean differences and their confidence intervals for the comparison of expressed breast milk versus oral sugar for heart rate**

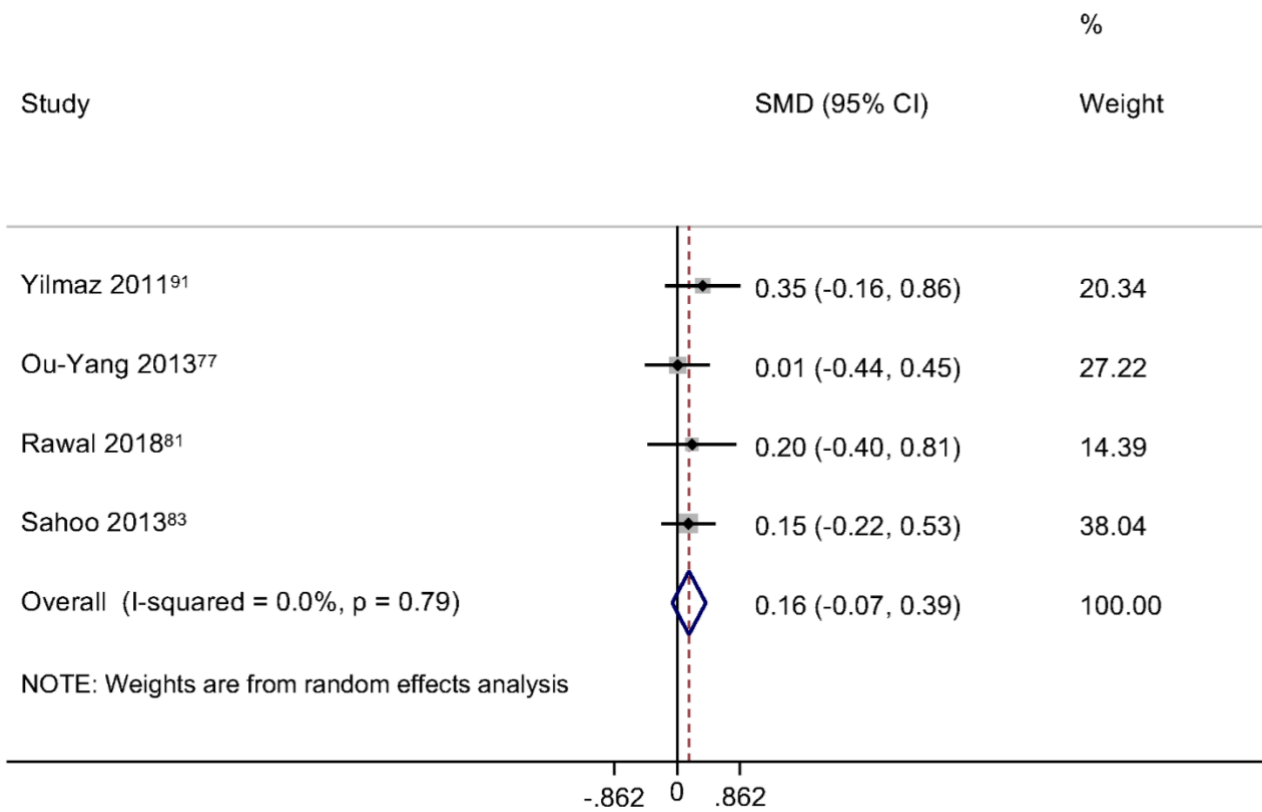

Note: P-value for test of standardised mean difference: 0.17  
 Abbreviations: CI=confidence interval, SMD=standardised mean difference



**Supplementary Figure 13. Standardised mean differences and their confidence intervals for the comparison of expressed breast milk vs oral sugar for oxygen saturation**

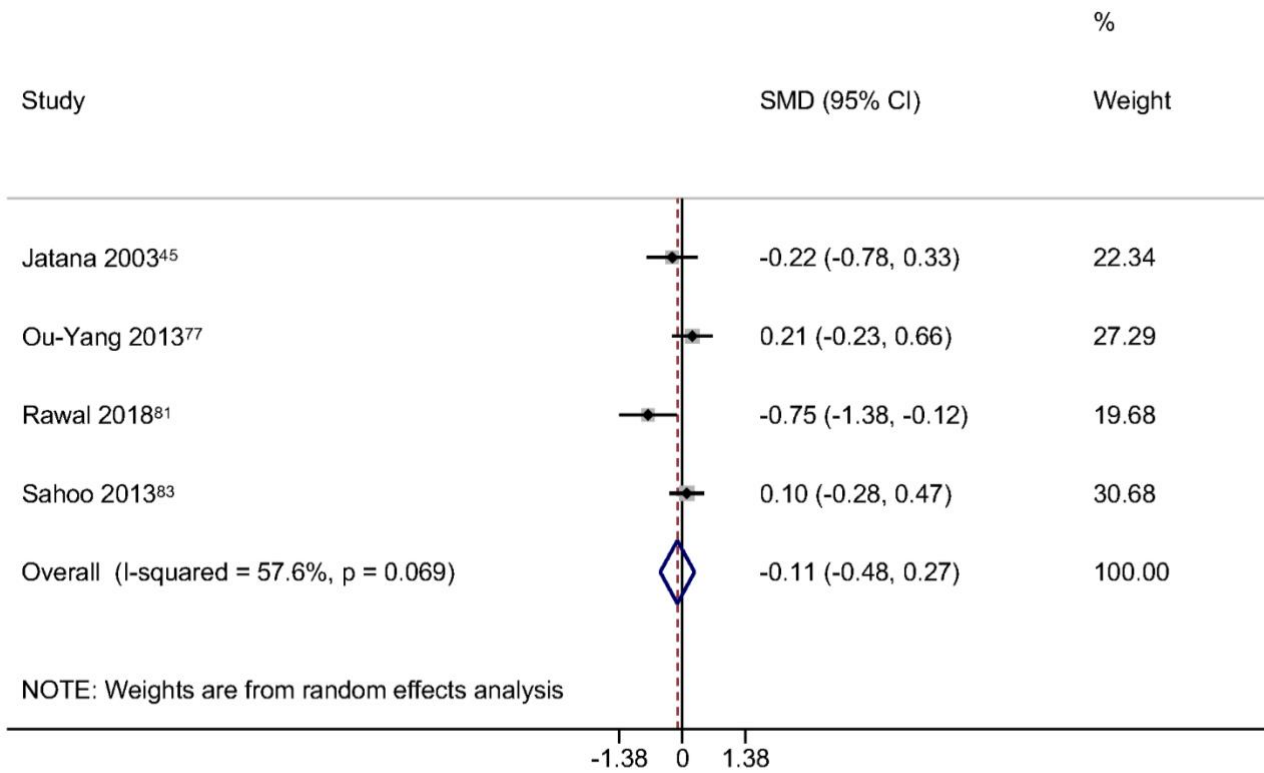

Note: P-value for test of standardised mean difference: 0.57

Abbreviations: CI=confidence interval, SMD=standardised mean difference

**Supplementary Figure 14. Standardised mean differences and their confidence intervals for the comparison of expressed breast milk versus oral sugar for PIPP**

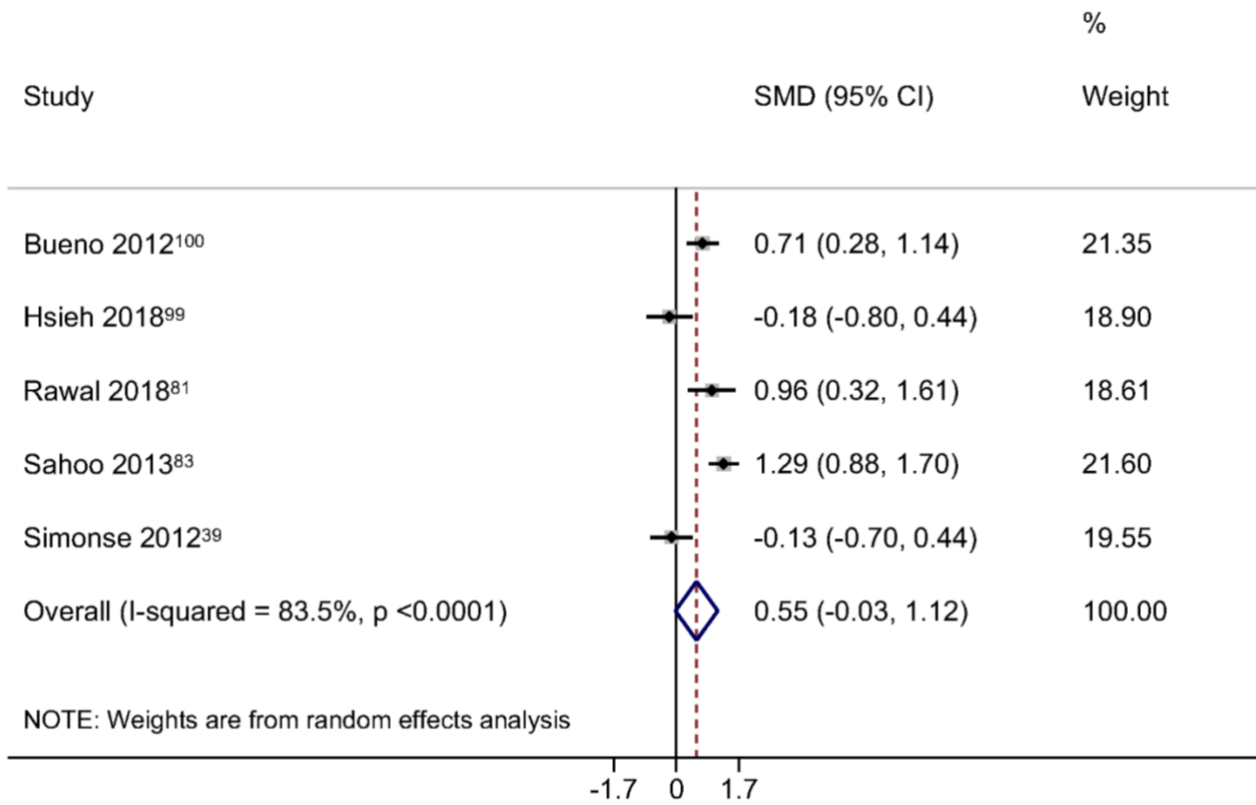

Note: P-value for test of standardised mean difference: 0.061

Abbreviations: CI=confidence interval, SMD=standardised mean difference, PIPP=Premature Infant Pain Profile

**Supplementary Figure 15. Standardised mean differences and their confidence intervals for the comparison of expressed breast milk versus oral sugar for NFCS**

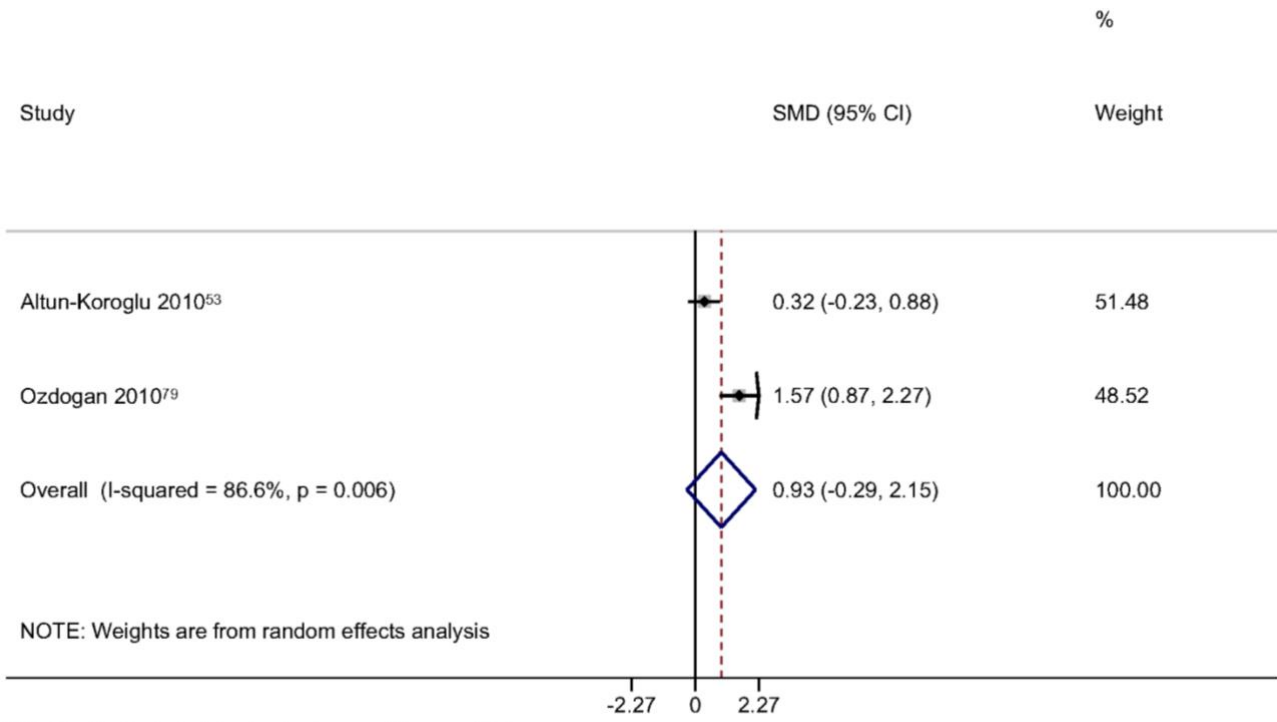

Note: P-value for test of standardised mean difference: 0.14

Abbreviations: CI=confidence interval, SMD=standardised mean difference, NCFS= Neonatal Facial Coding System

**Supplementary Figure 16. Standardised mean differences and their confidence intervals for the comparison of non-nutritive sucking versus oral sugar for heart rate**

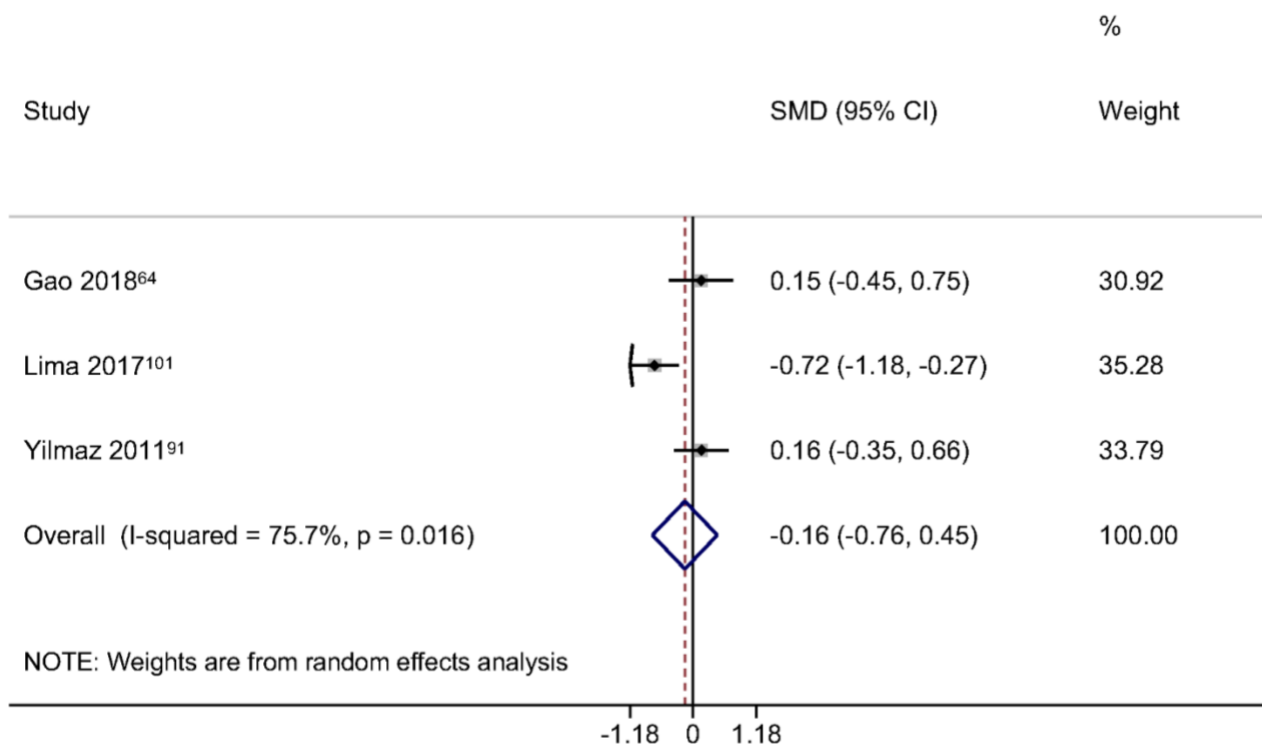

**Supplementary Figure 17. Standardised mean differences and their confidence intervals for the comparison of non-nutritive sucking vs oral sugar for oxygen saturation**

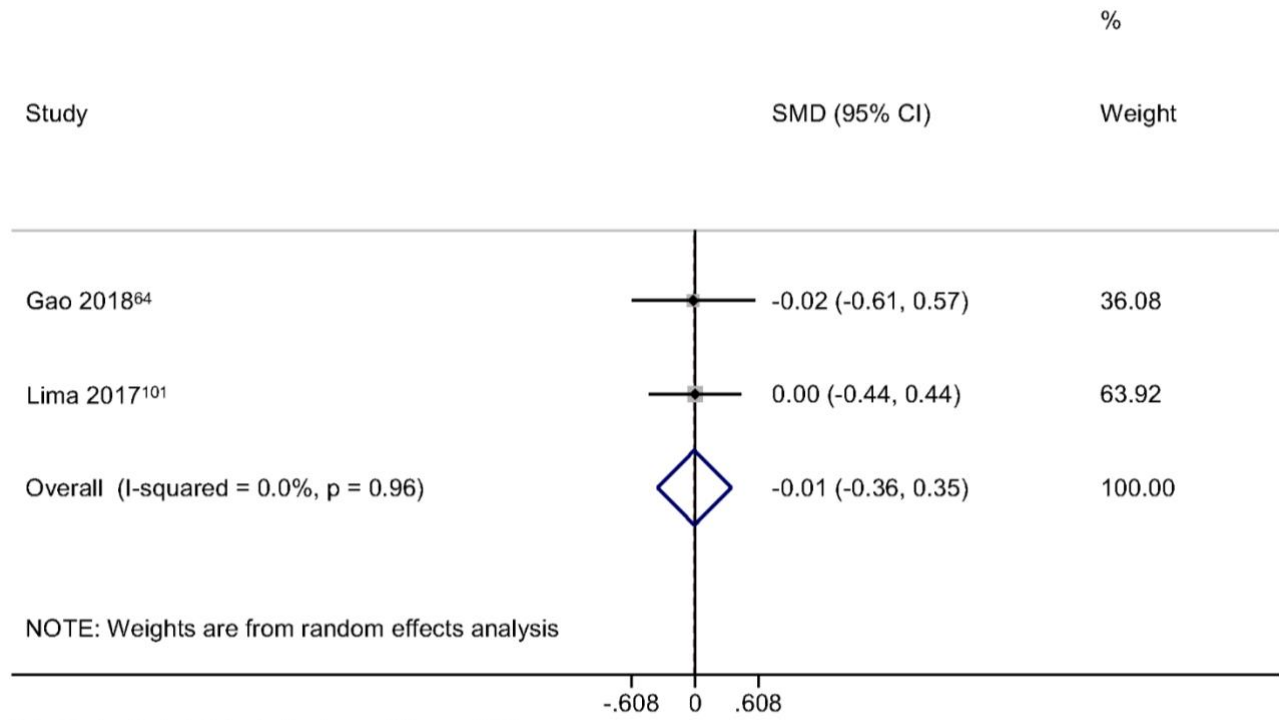

Note: P-value for test of standardised mean difference: 0.97

Abbreviations: CI=confidence interval, SMD=standardised mean difference

**Supplementary Figure 18. Standardised mean differences and their confidence intervals for the comparison of non-nutritive sucking versus oral sugar for NIPS**

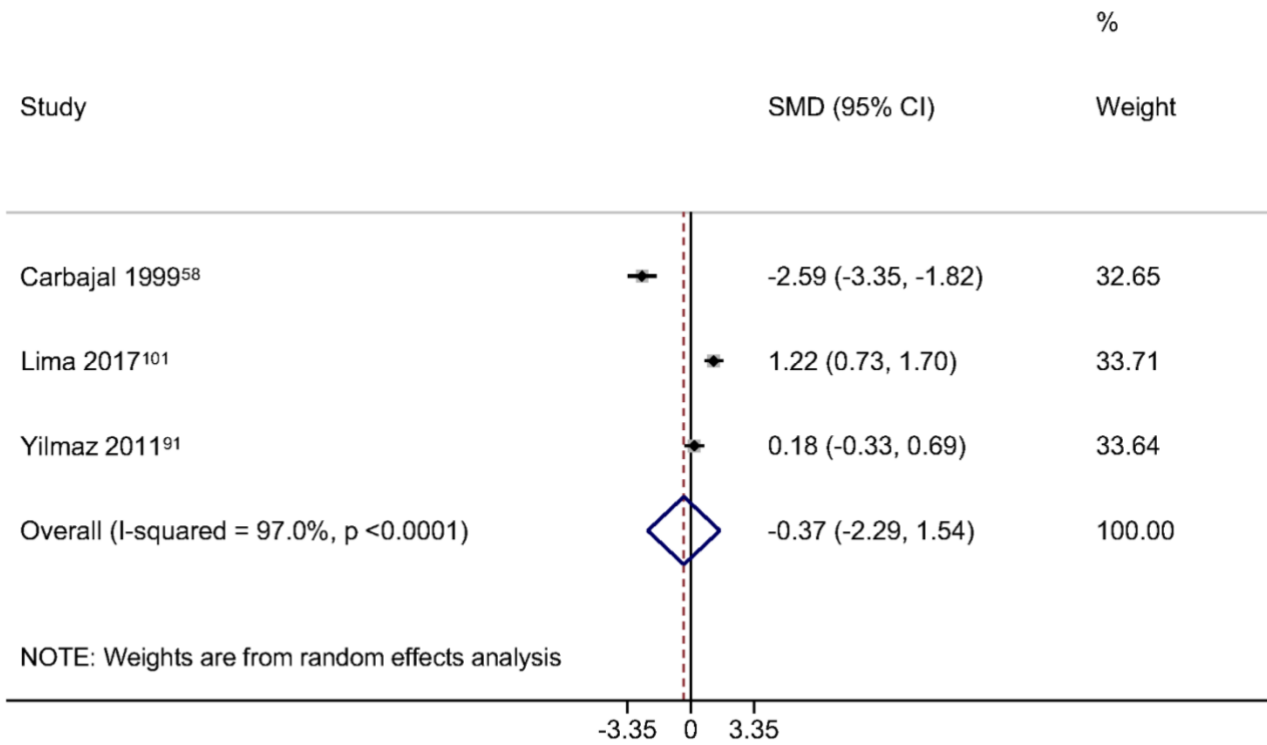

Note: P-value for test of standardised mean difference: 0.70

Abbreviations: CI=confidence interval, SMD=standardised mean difference, NIPS=Neonatal Infant Pain Scale

**Supplementary Figure 19. Standardised mean differences and their confidence intervals for the comparison of non-nutritive sucking versus oral sugar for DAN**

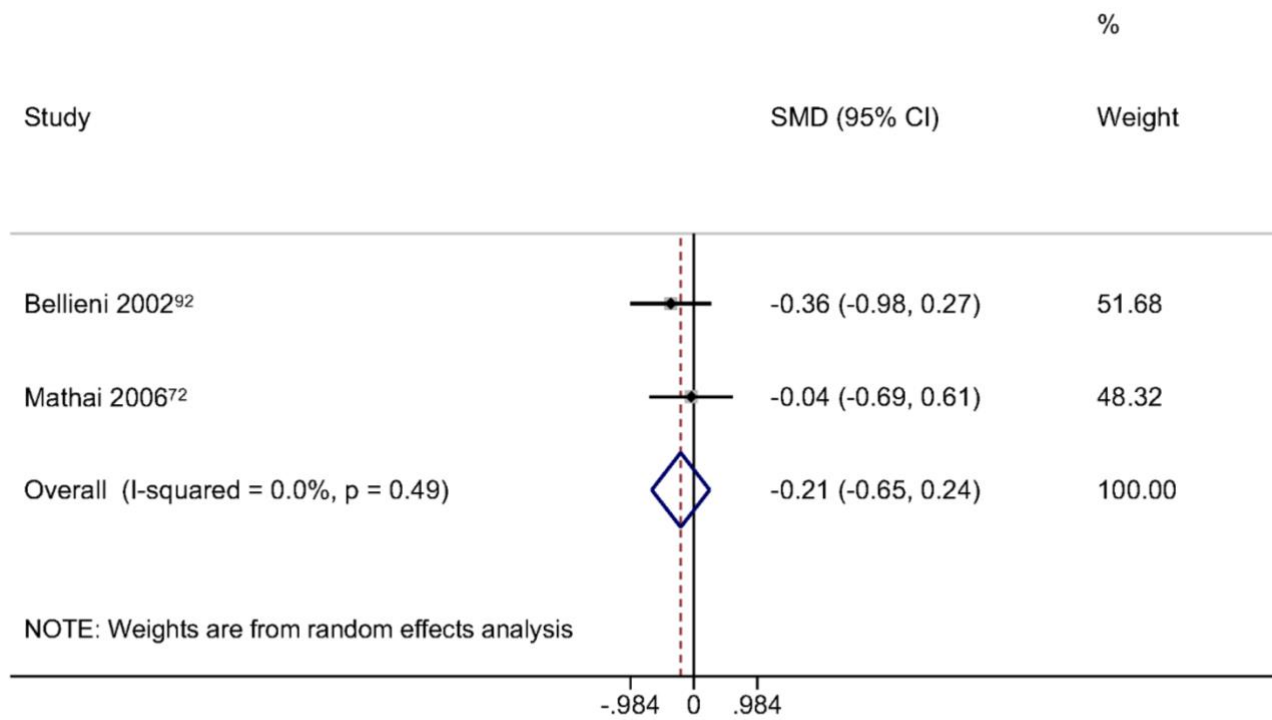

Note: P-value for test of standardised mean difference: 0.37

Abbreviations: CI=confidence interval, SMD=standardised mean difference, DAN= Douleur Aigue du Nouveau-né

**Supplementary Figure 20. Standardised mean differences and their confidence intervals for the comparison of expressed breast milk versus placebo or no intervention for heart rate**

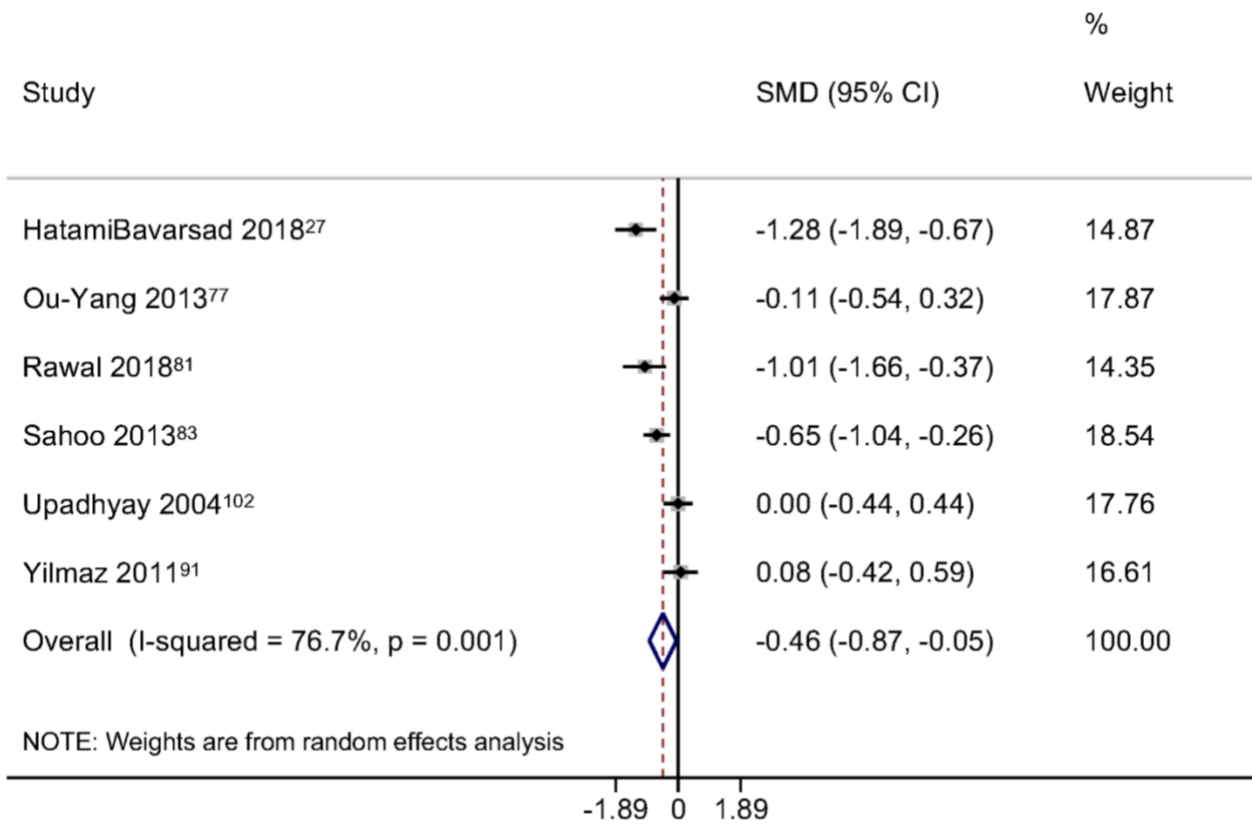

Note: P-value for test of standardised mean difference: 0.028

Abbreviations: CI=confidence interval, SMD=standardised mean difference



**Supplementary Figure 21. Standardised mean differences and their confidence intervals for the comparison of expressed breast milk vs placebo or no intervention for oxygen saturation**

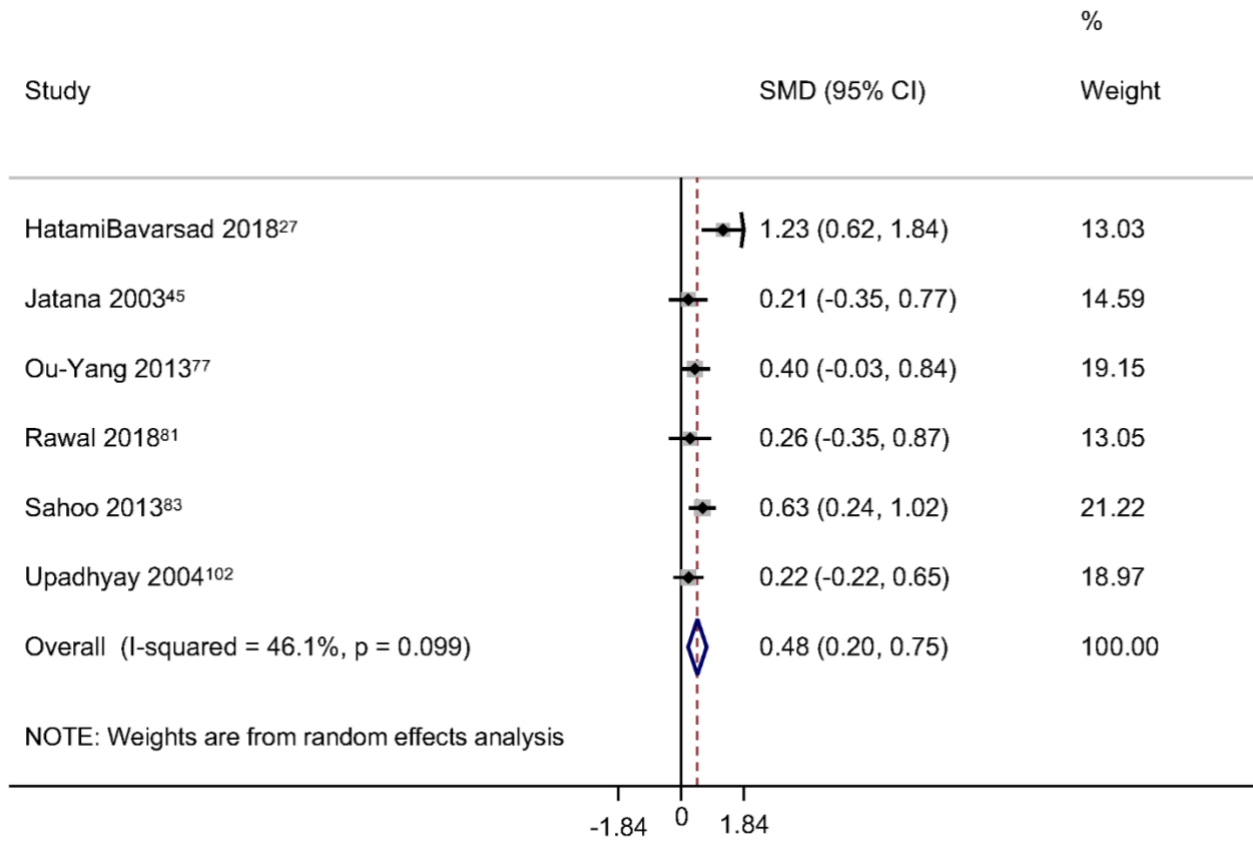

Note: P-value for test of standardised mean difference: <0.001

Abbreviations: CI=confidence interval, SMD=standardised mean difference

**Supplementary Figure 22. Standardised mean differences and their confidence intervals for the comparison of expressed breast milk versus placebo or no intervention for PIPP**

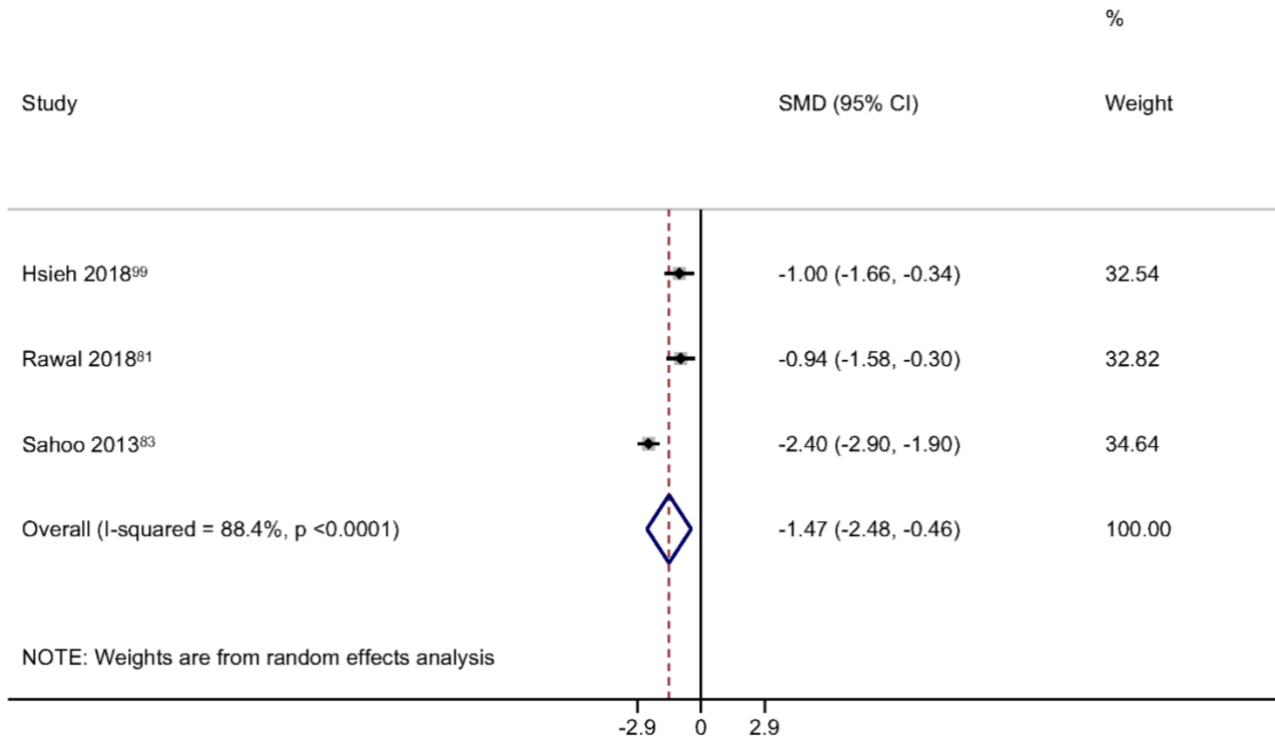

Note: P-value for test of standardised mean difference: 0.004

Abbreviations: CI=confidence interval, SMD=standardised mean difference, PIPP=Premature Infant Pain Profile

**Supplementary Figure 23. Standardised mean differences and their confidence intervals for the comparison of expressed breast milk versus placebo or no intervention for DAN**

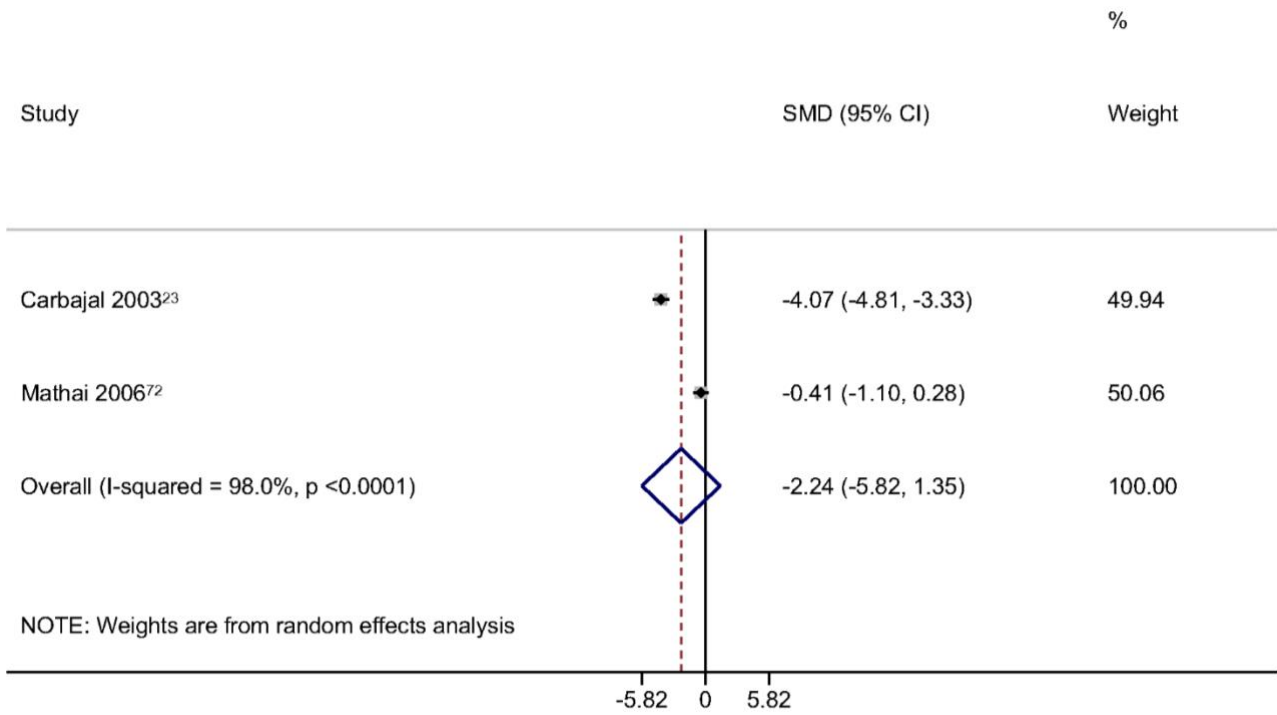

Note: P-value for test of standardised mean difference: 0.21

Abbreviations: CI=confidence interval, SMD=standardised mean difference, DAN= Douleur Aigue du Nouveau-né

**Supplementary Figure 24. Standardised mean differences and their confidence intervals for the comparison of skin-to-skin versus placebo or no intervention for oxygen saturation**

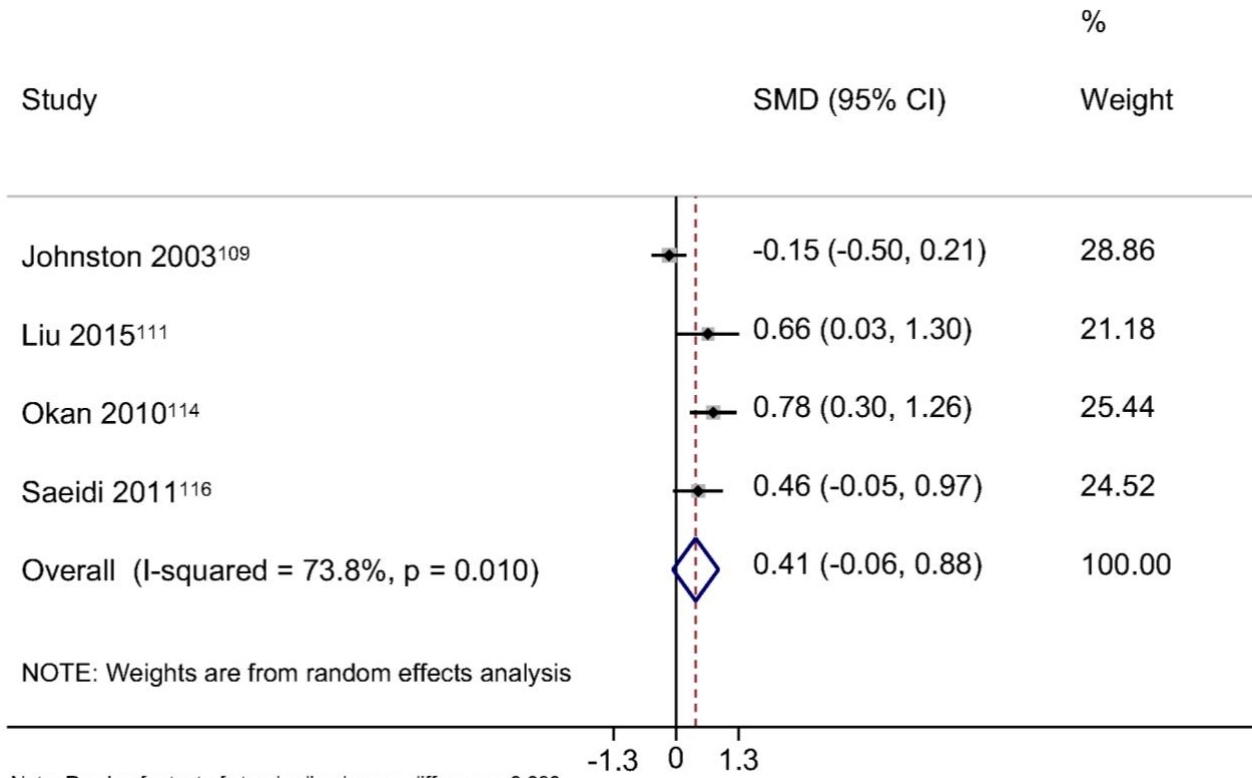

**Supplementary Figure 25. Standardised mean differences and their confidence intervals for the comparison of skin-to-skin versus placebo or no intervention for NFCS**

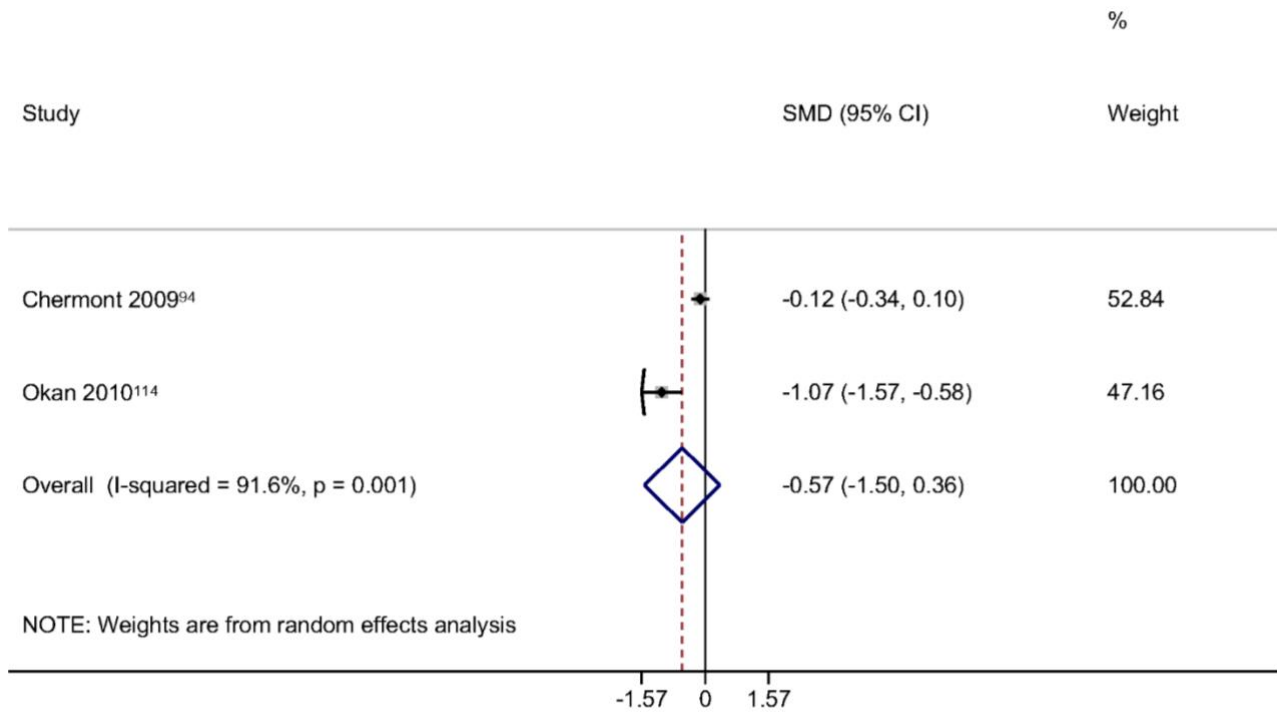

Note: P-value for test of standardised mean difference: 0.23

Abbreviations: CI=confidence interval, SMD=standardised mean difference, NFCS= Neonatal Facial Coding System

**Supplementary Figure 26. Standardised mean differences and their confidence intervals for the comparison of non-nutritive sucking versus placebo or no intervention for heart rate**

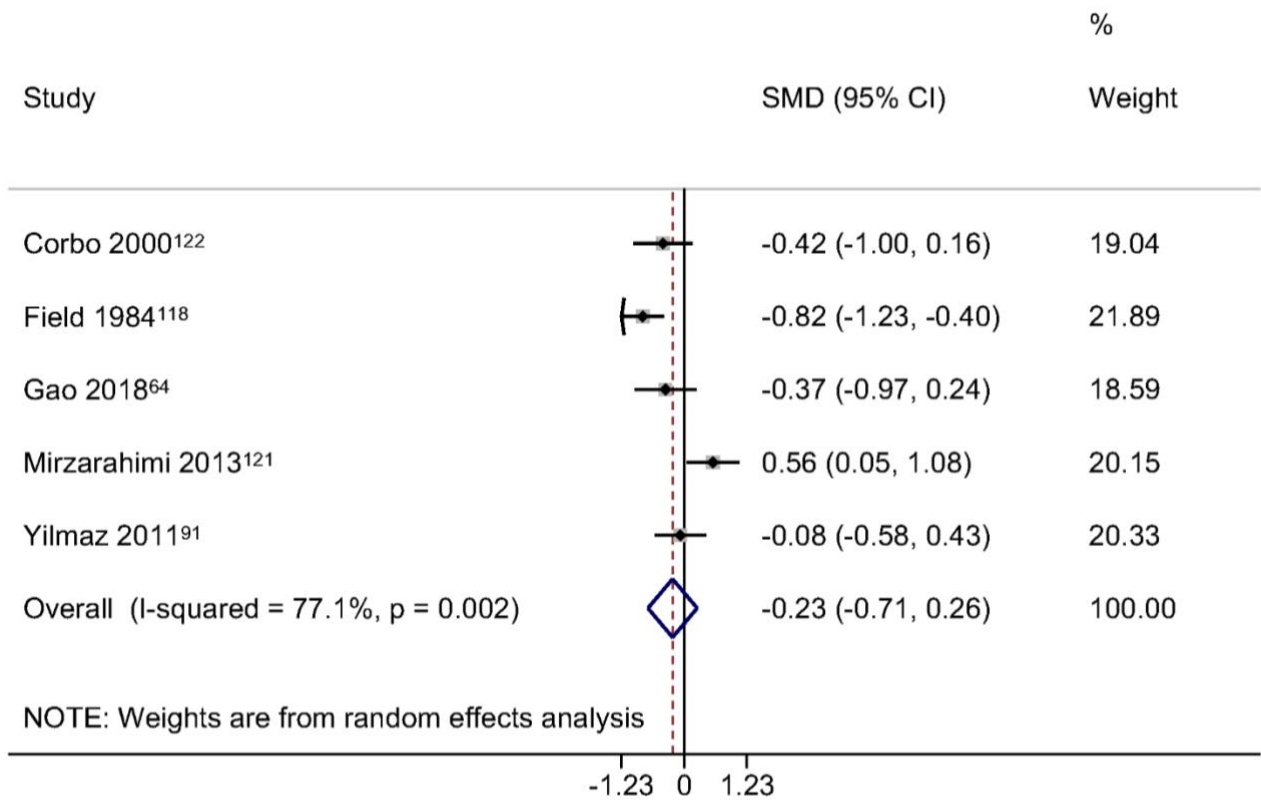

Note: P-value for test of standardised mean difference: 0.35

Abbreviations: CI=confidence interval, SMD=standardised mean difference

**Supplementary Figure 27. Standardised mean differences and their confidence intervals for the comparison of non-nutritive sucking versus placebo or no intervention for oxygen saturation**

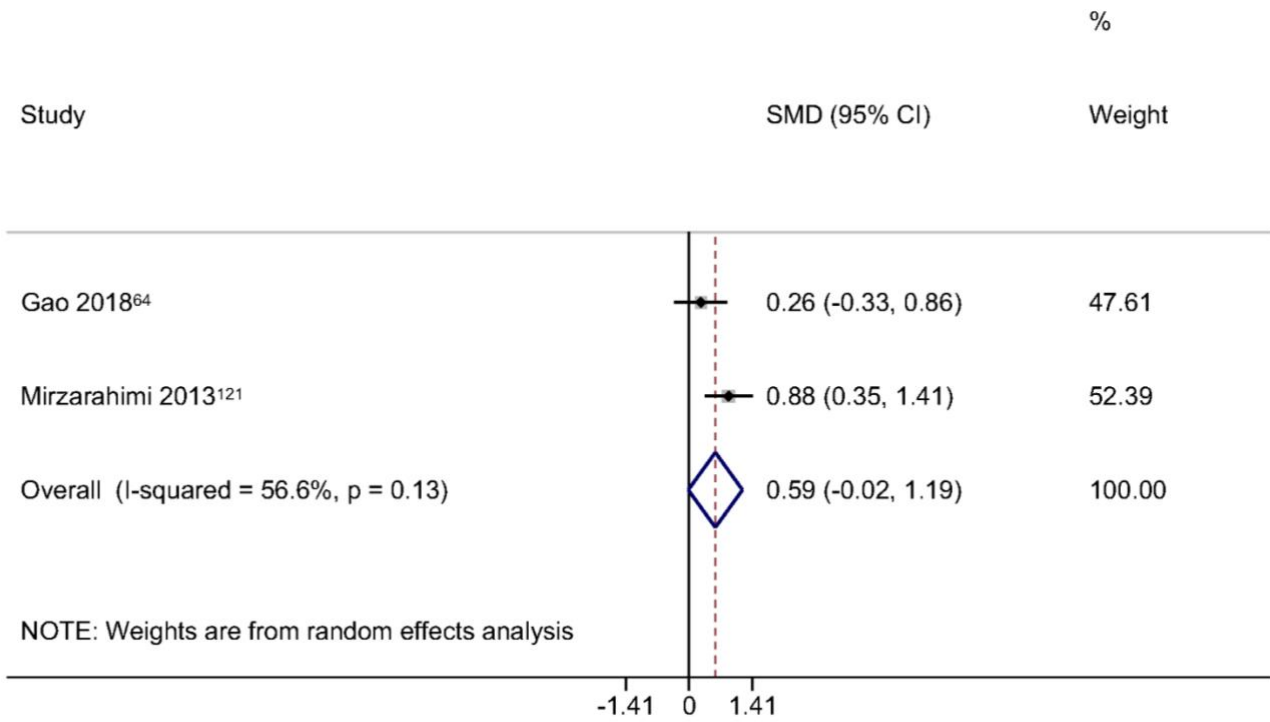

Note: P-value for test of standardised mean difference: 0.057

Abbreviations: CI=confidence interval, SMD=standardised mean difference

**Supplementary Figure 28. Standardised mean differences and their confidence intervals for the comparison of non-nutritive sucking versus placebo or no intervention for PIPP**

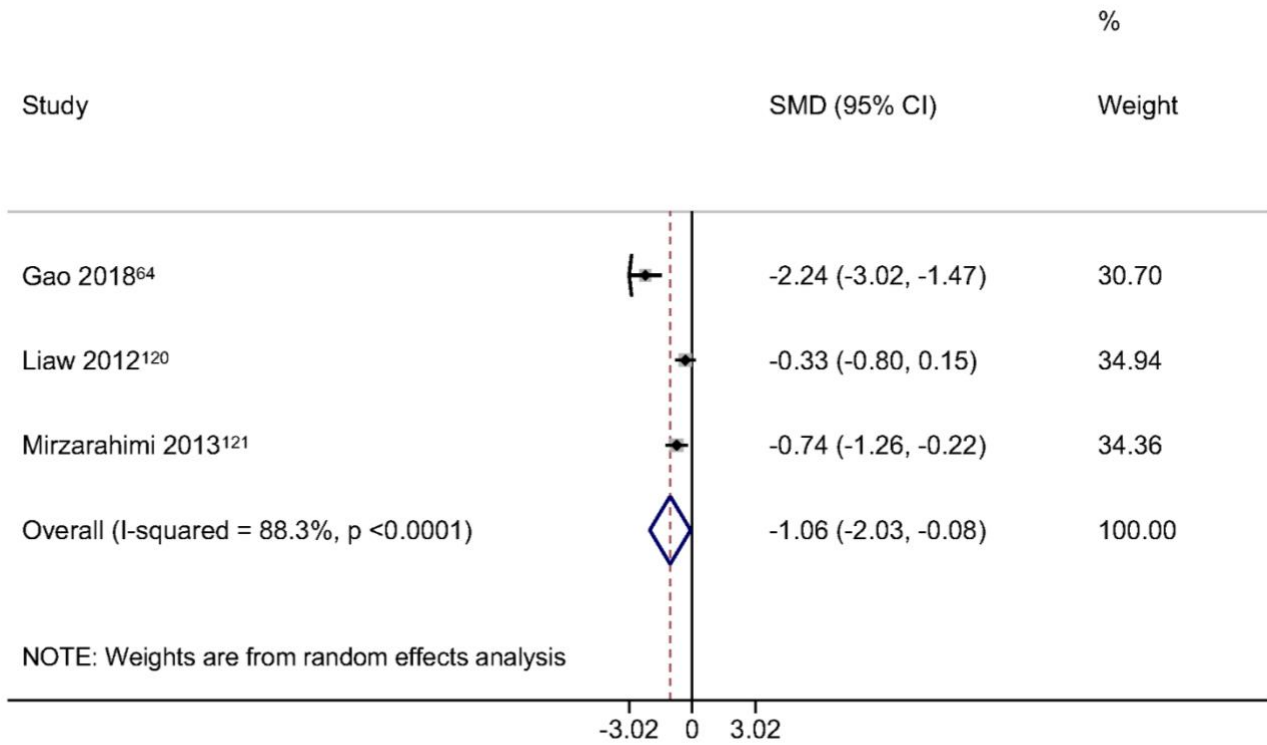

Note: P-value for test of standardised mean difference: 0.034

Abbreviations: CI=confidence interval, SMD=standardised mean difference, PIPP=Premature Infant Pain Profile



**Supplementary Figure 29. Standardised mean differences and their confidence intervals for the comparison of non-nutritive sucking versus placebo or no intervention for DAN**

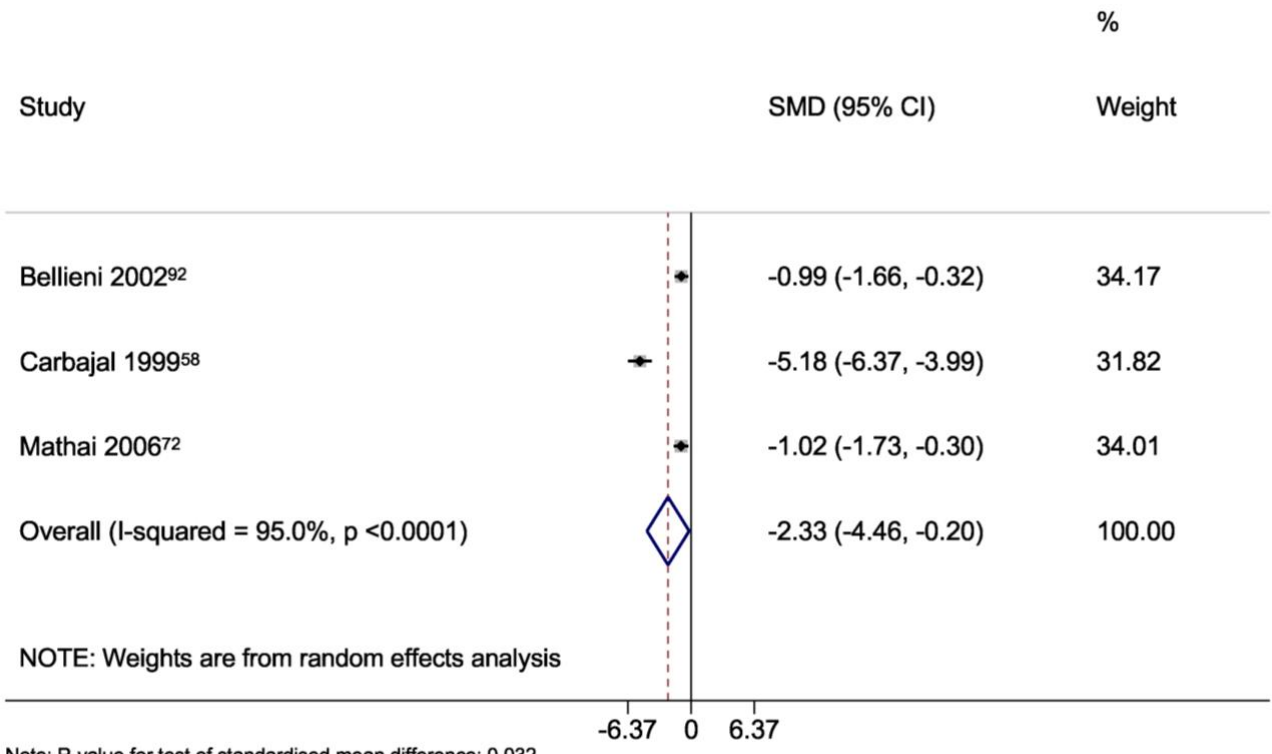

**Supplementary Figure 30. Standardised mean differences and their confidence intervals for the comparison of oral dextrose versus placebo or no intervention for heart rate**

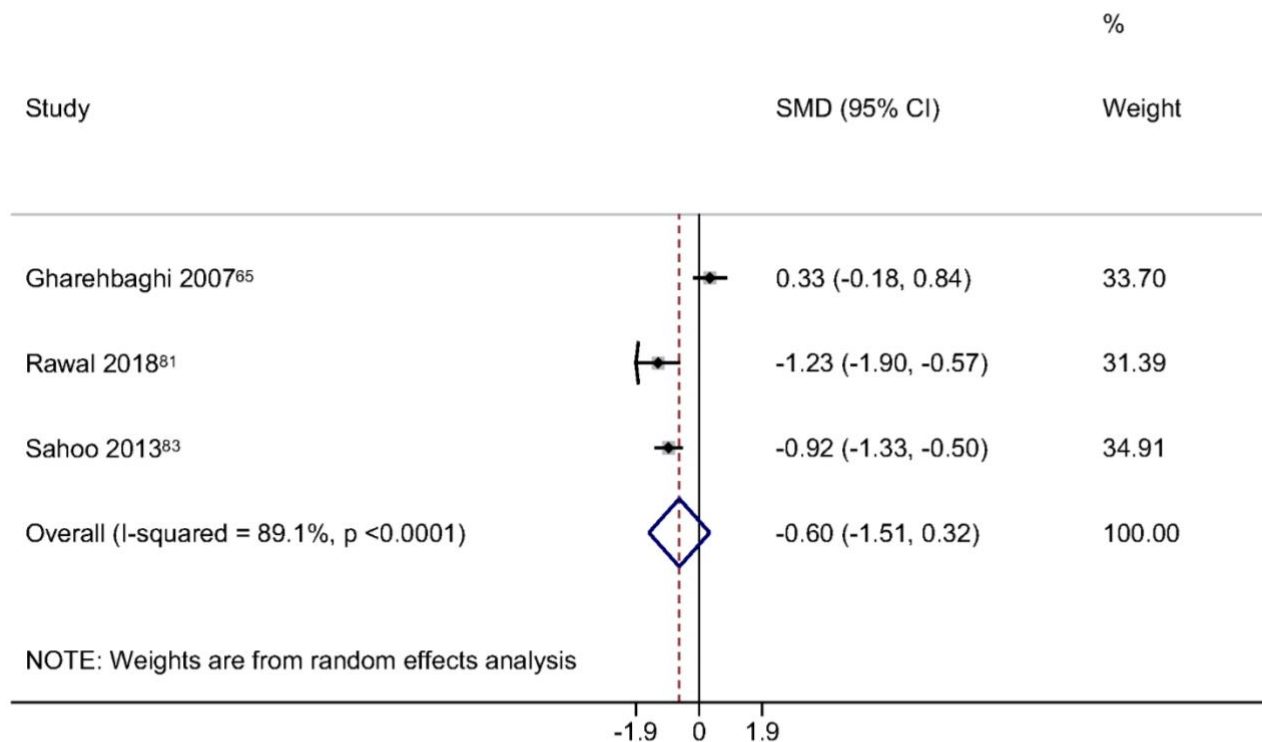

Note: P-value for test of standardised mean difference: 0.20

Abbreviations: CI=confidence interval, SMD=standardised mean difference

**Supplementary Figure 31. Standardised mean differences and their confidence intervals for the comparison of oral glucose versus placebo or no intervention for heart rate**

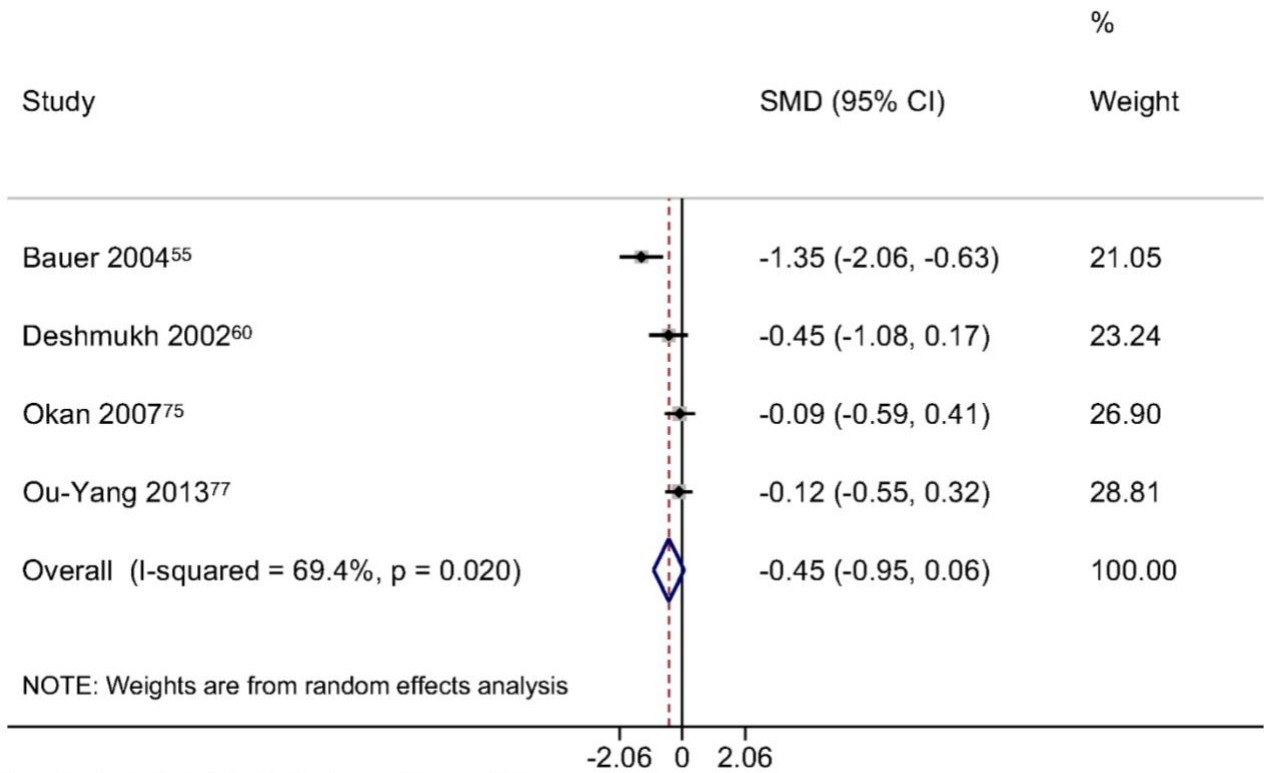

Note: P-value for test of standardised mean difference: 0.08

Abbreviations: CI=confidence interval, SMD=standardised mean difference

**Supplementary Figure 32. Standardised mean differences and their confidence intervals for the comparison of oral sucrose versus placebo or no intervention for heart rate**

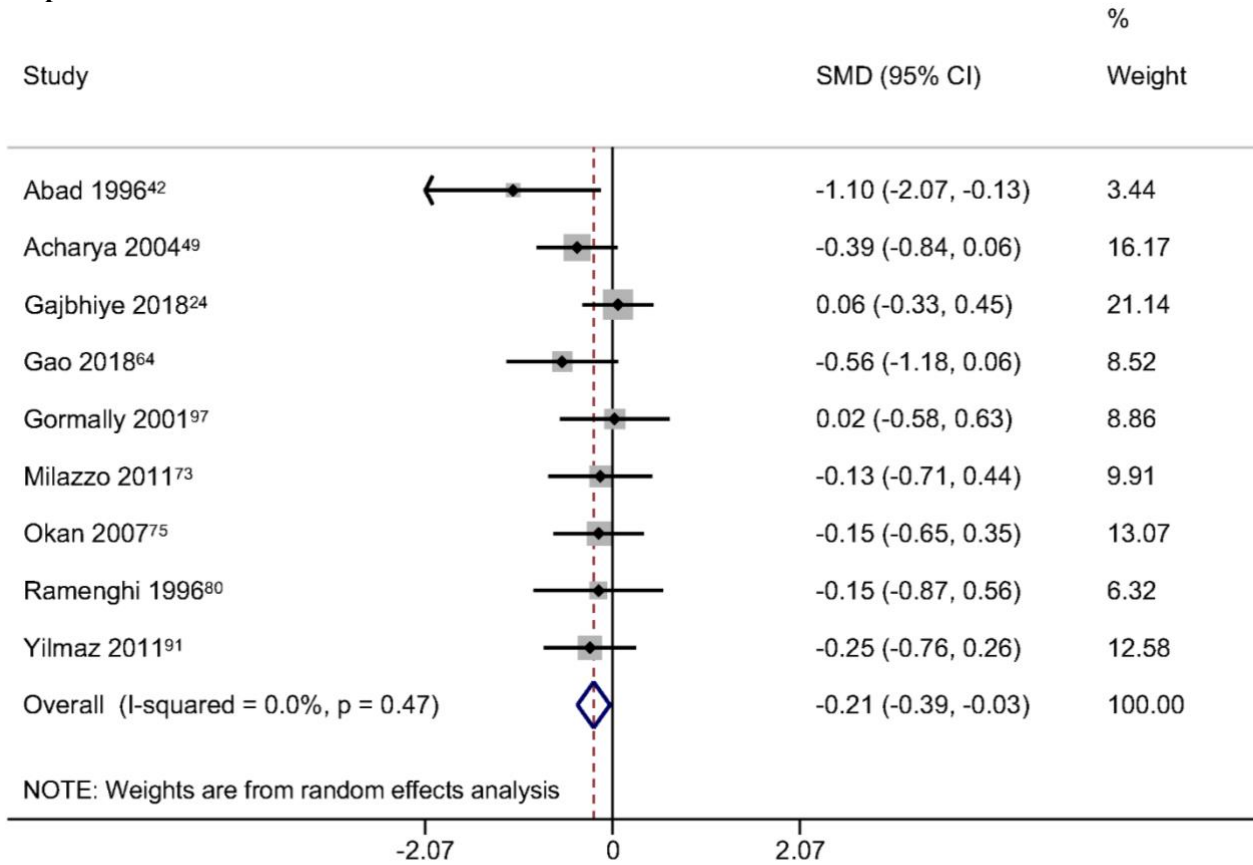

NOTE: Weights are from random effects analysis

Note: P-value for test of standardised mean difference: 0.023  
 Abbreviations: CI=confidence interval, SMD=standardised mean difference

**Supplementary Figure 33. Standardised mean differences and their confidence intervals for the comparison of oral dextrose versus placebo or no intervention for oxygen saturation**

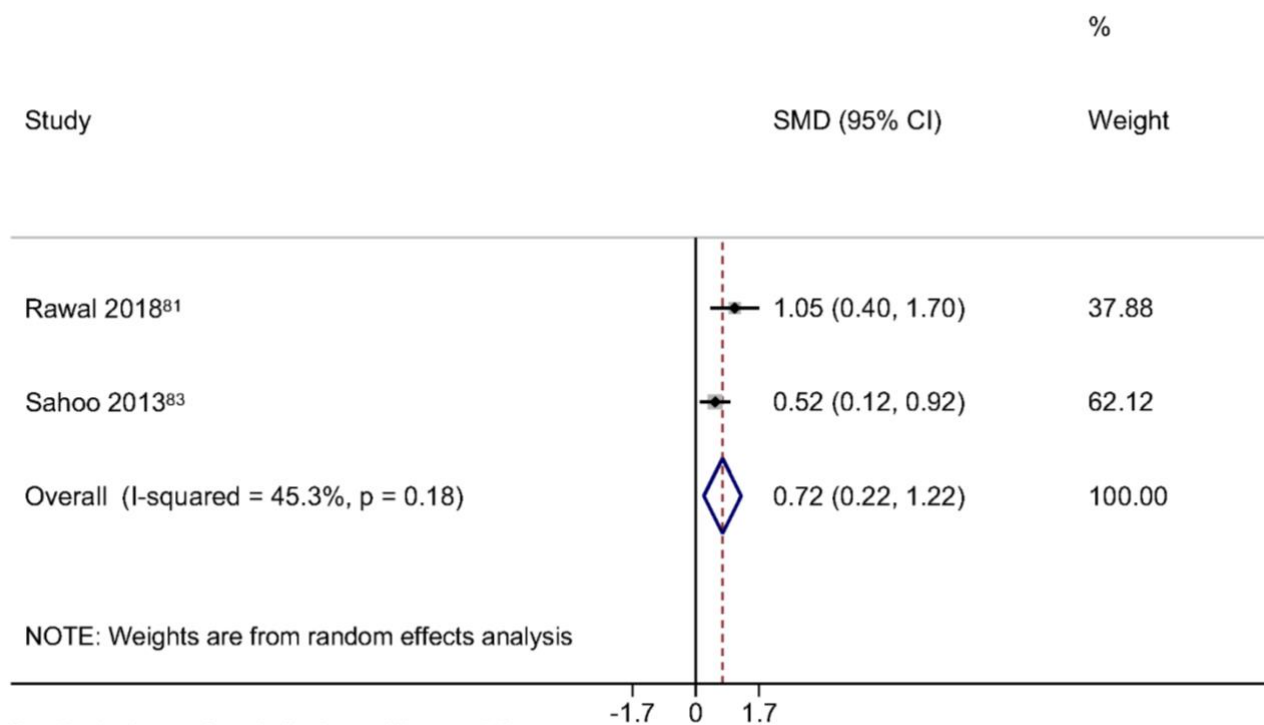

NOTE: Weights are from random effects analysis

Note: P-value for test of standardised mean difference: 0.01

Abbreviations: CI=confidence interval, SMD=standardised mean difference

**Supplementary Figure 34. Standardised mean differences and their confidence intervals for the comparison of oral glucose versus placebo or no intervention for oxygen saturation**

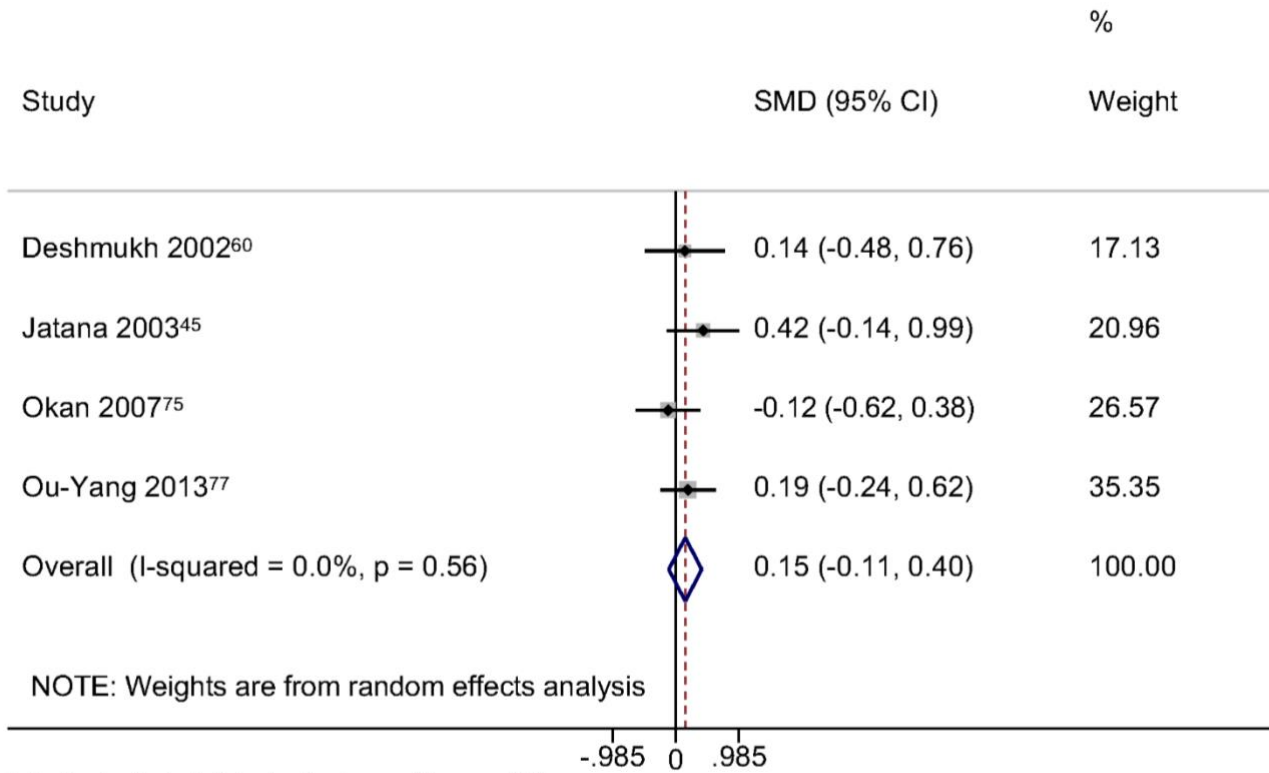

**Supplementary Figure 35. Standardised mean differences and their confidence intervals for the comparison of oral sucrose versus placebo or no intervention for oxygen saturation**

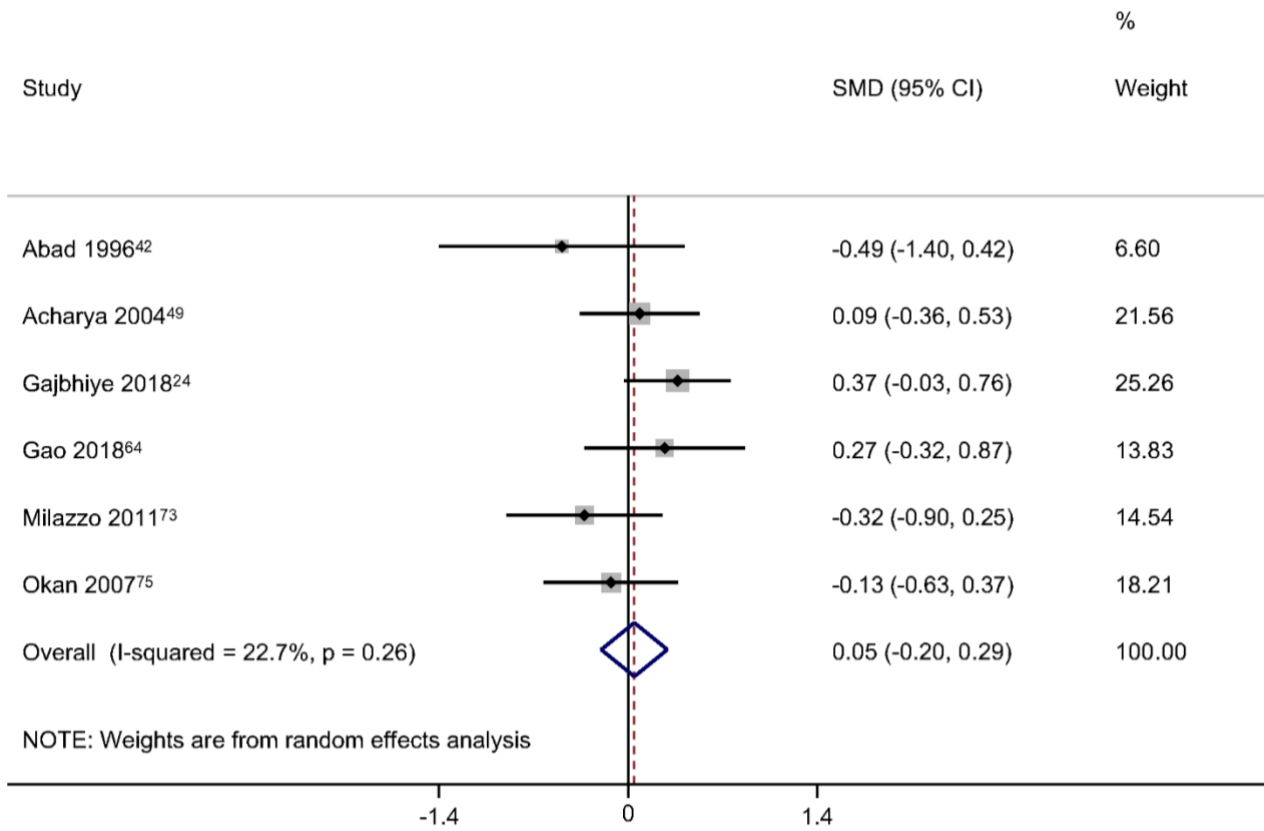

Note: P-value for test of standardised mean difference: 0.71

Abbreviations: CI=confidence interval, SMD=standardised mean difference

**Supplementary Figure 36. Standardised mean differences and their confidence intervals for the comparison of oral dextrose versus placebo or no intervention for PIPP**

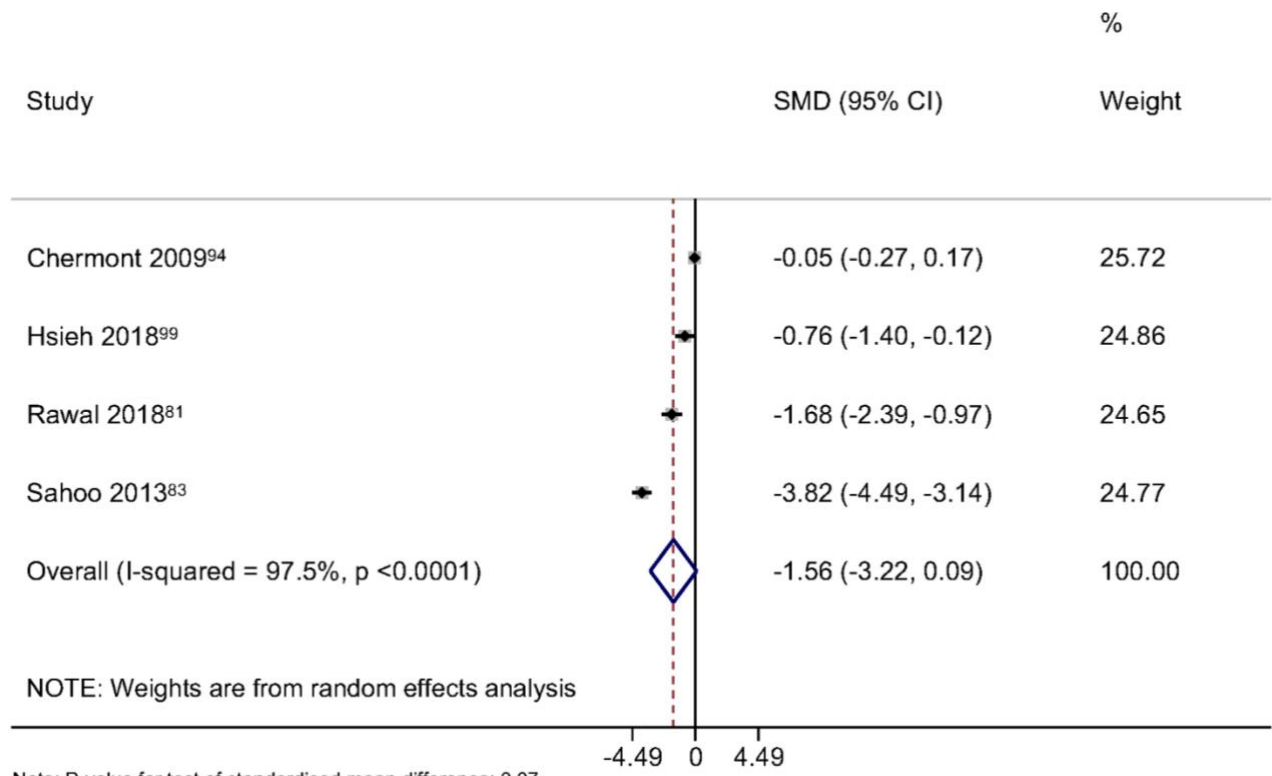



**Supplementary Figure 37. Standardised mean differences and their confidence intervals for the comparison of oral glucose versus placebo or no intervention for PIPP**

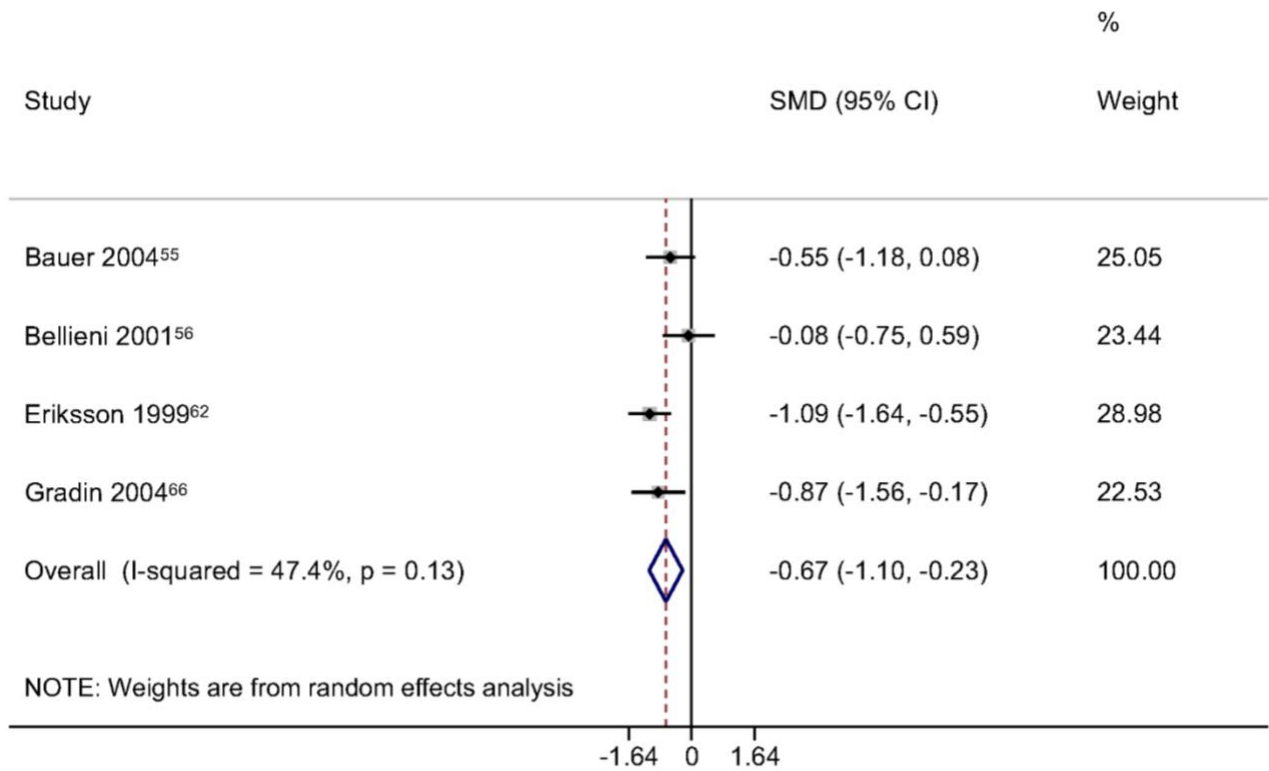

Note: P-value for test of standardised mean difference: 0.003

Abbreviations: CI=confidence interval, SMD=standardised mean difference, PIPP=Premature Infant Pain Profile

**Supplementary Figure 38. Standardised mean differences and their confidence intervals for the comparison of oral sucrose versus placebo or no intervention for PIPP**

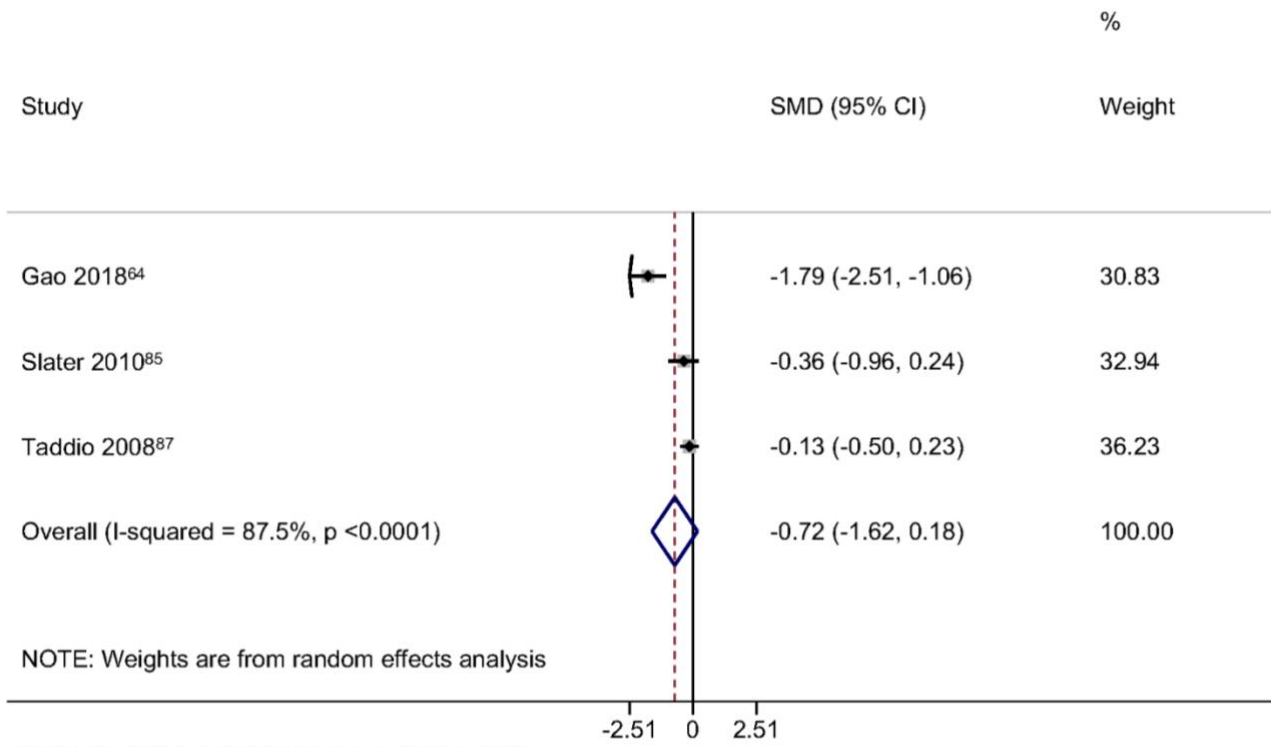

**Supplementary Figure 39. Standardised mean differences and their confidence intervals for the comparison of oral sugar versus no intervention only for heart rate**

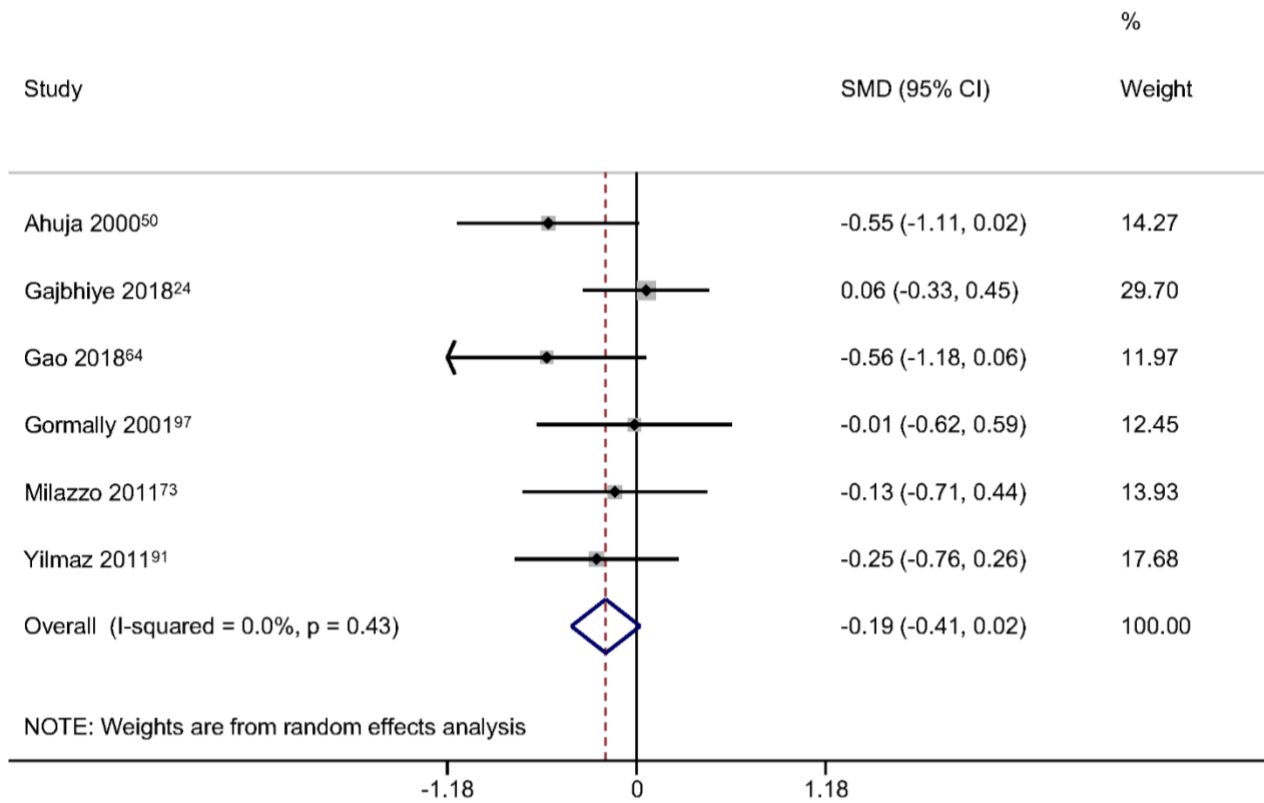

**Supplementary Figure 40. Standardised mean differences and their confidence intervals for the comparison of oral sugar versus placebo only for heart rate**

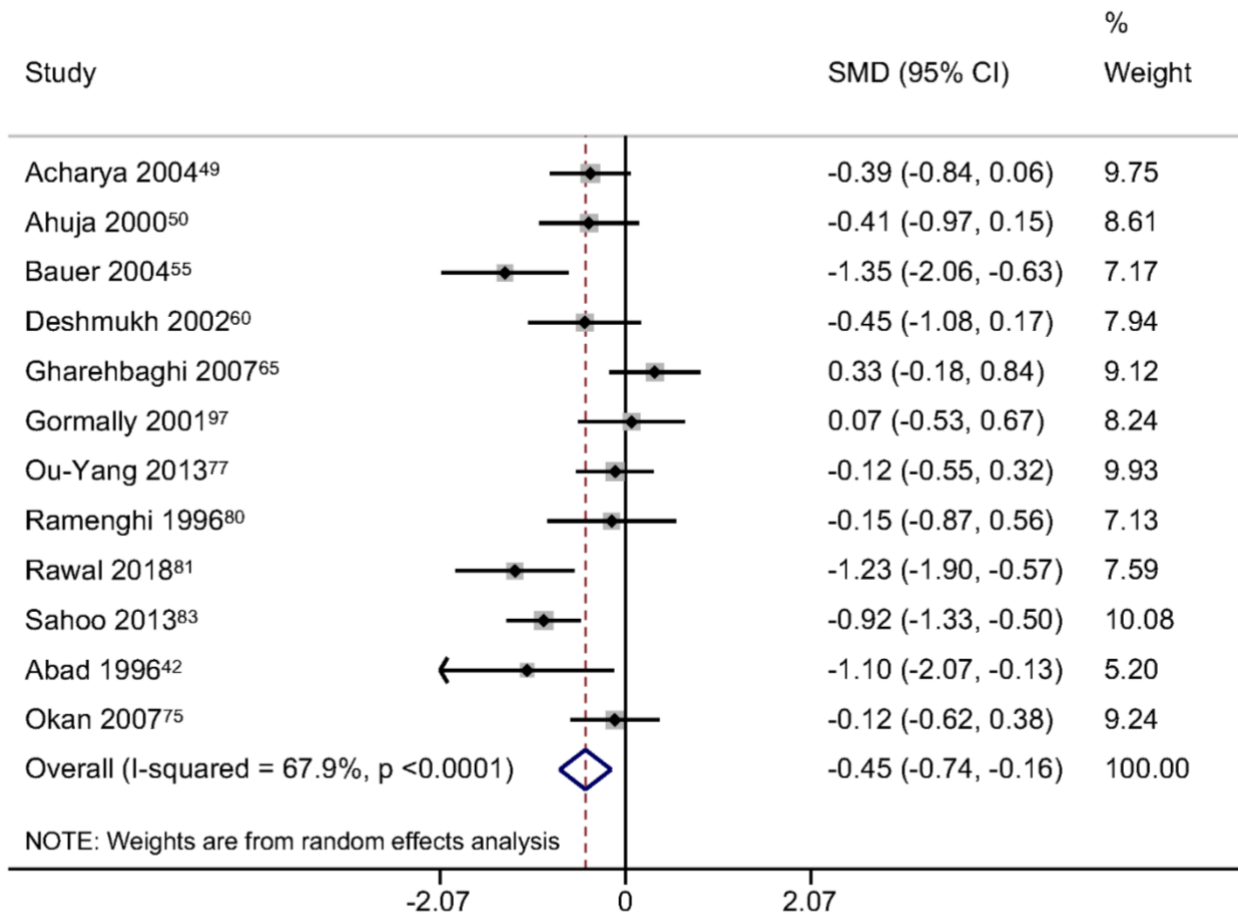

Note: P-value for test of standardised mean difference: 0.002  
 Abbreviations: CI=confidence interval, SMD=standardised mean difference

**Supplementary Figure 41. Standardised mean differences and their confidence intervals for the comparison of oral sugar versus no intervention only for oxygen saturation**

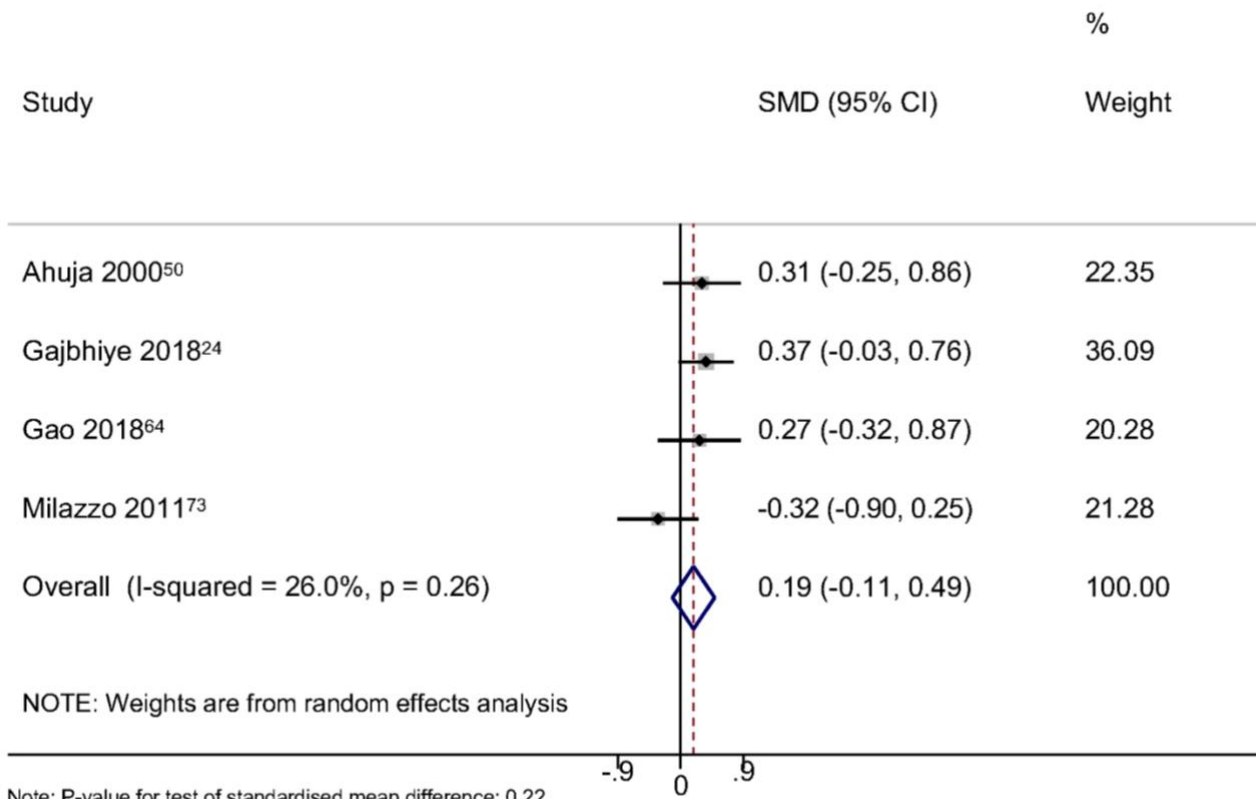

**Supplementary Figure 42. Standardised mean differences and their confidence intervals for the comparison of oral sugar versus placebo only for oxygen saturation**

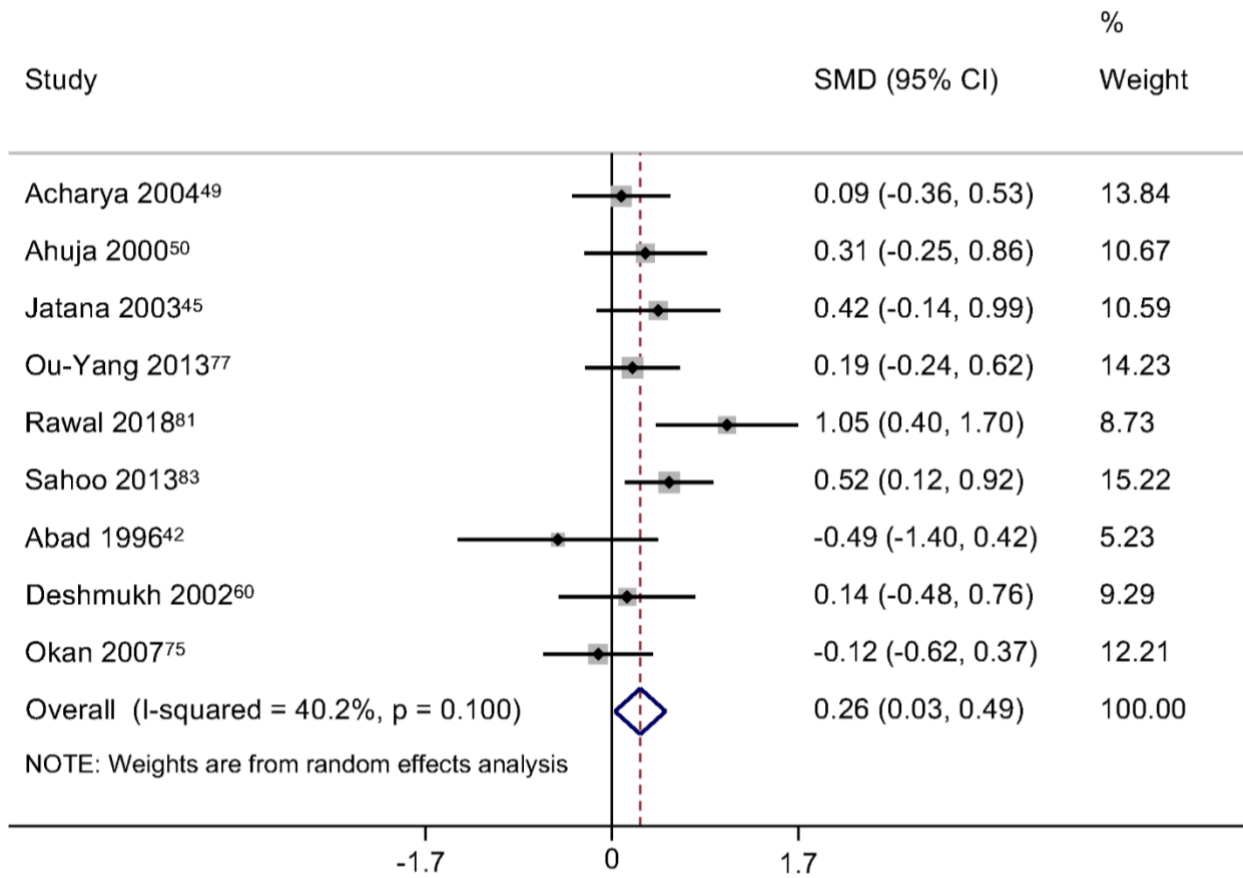

Note: P-value for test of standardised mean difference: 0.027  
 Abbreviations: CI=confidence interval, SMD=standardised mean difference

**Supplementary Figure 43. Standardised mean differences and their confidence intervals for the comparison of oral sugar versus no intervention only for PIPP**

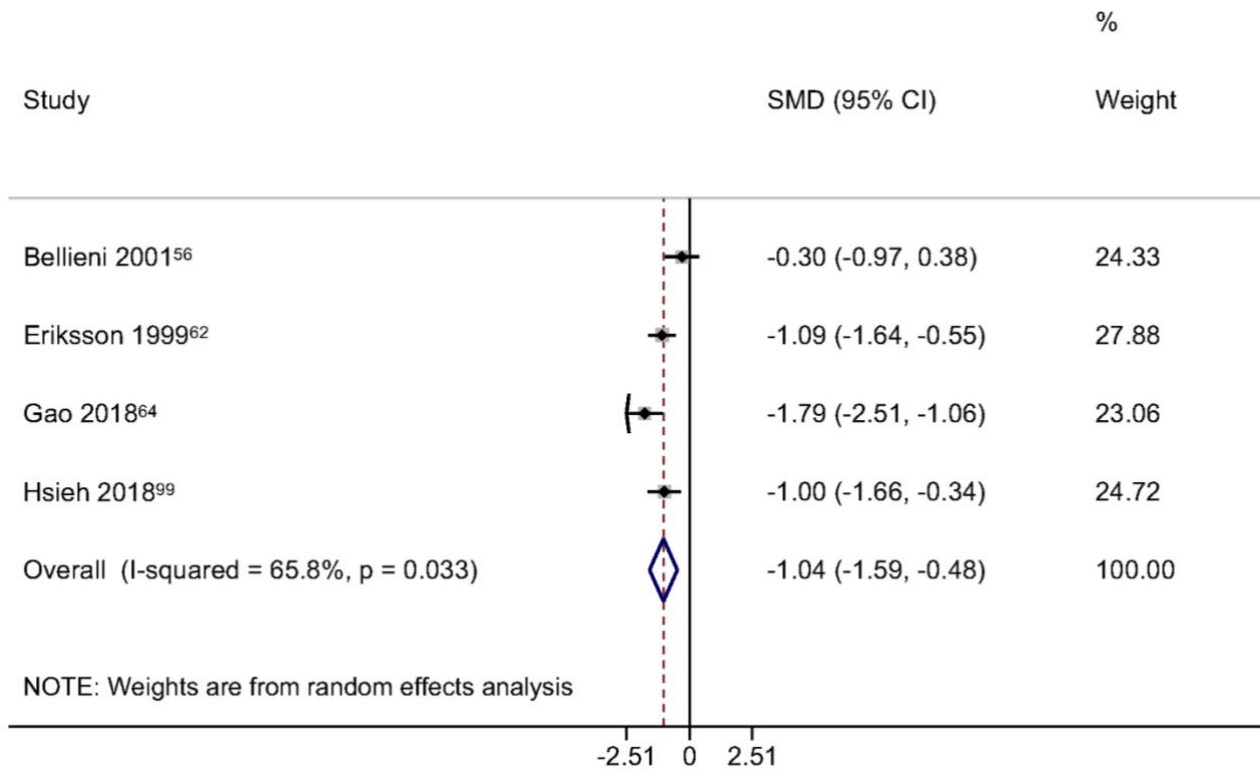

**Supplementary Figure 44. Standardised mean differences and their confidence intervals for the comparison of oral sugar versus placebo only for PIPP**

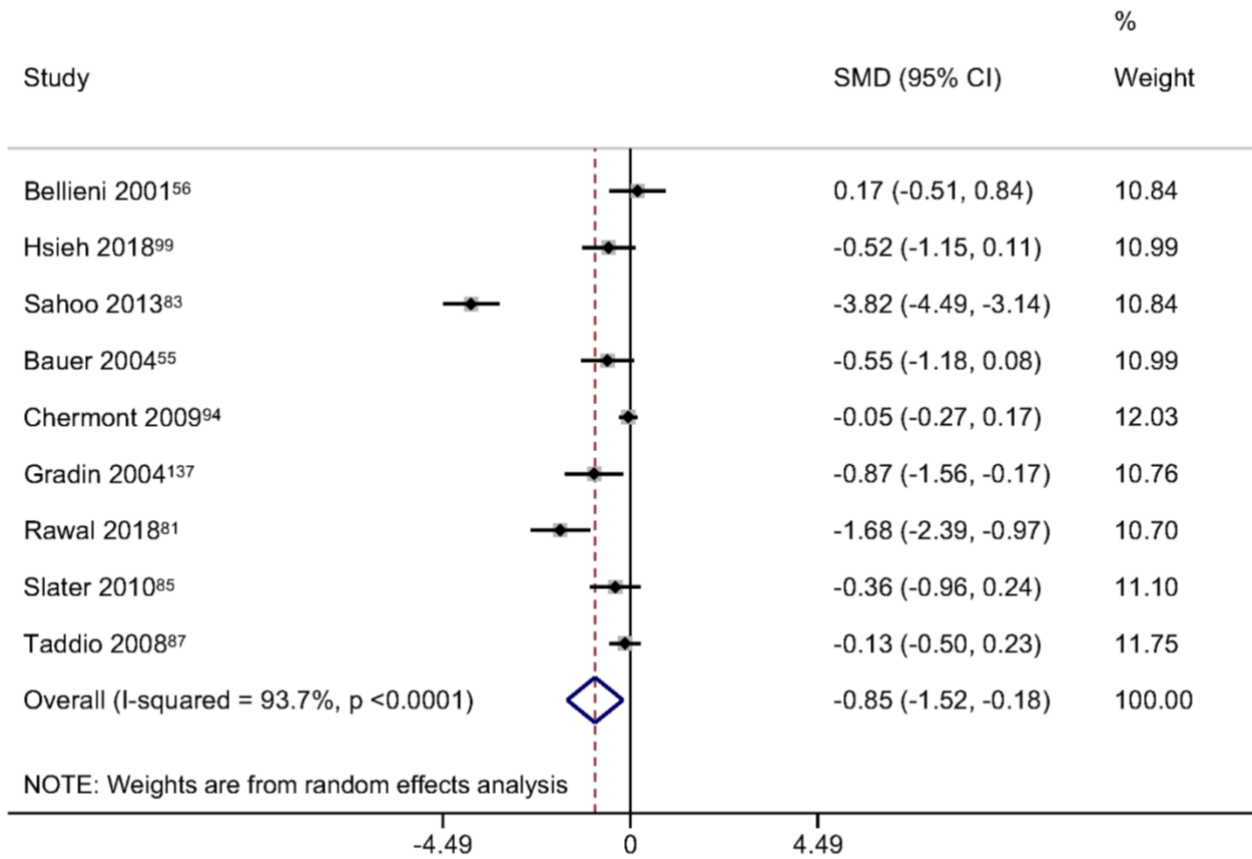

Note: P-value for test of standardised mean difference: 0.001

Abbreviations: CI=confidence interval, SMD=standardised mean difference, PIPP=Premature Infant Pain Profile



**Supplementary Figure 45. Standardised mean differences and their confidence intervals for the comparison of oral sugar versus placebo or no intervention with heart rate measured  $\leq 1$  minute after procedure commencement**

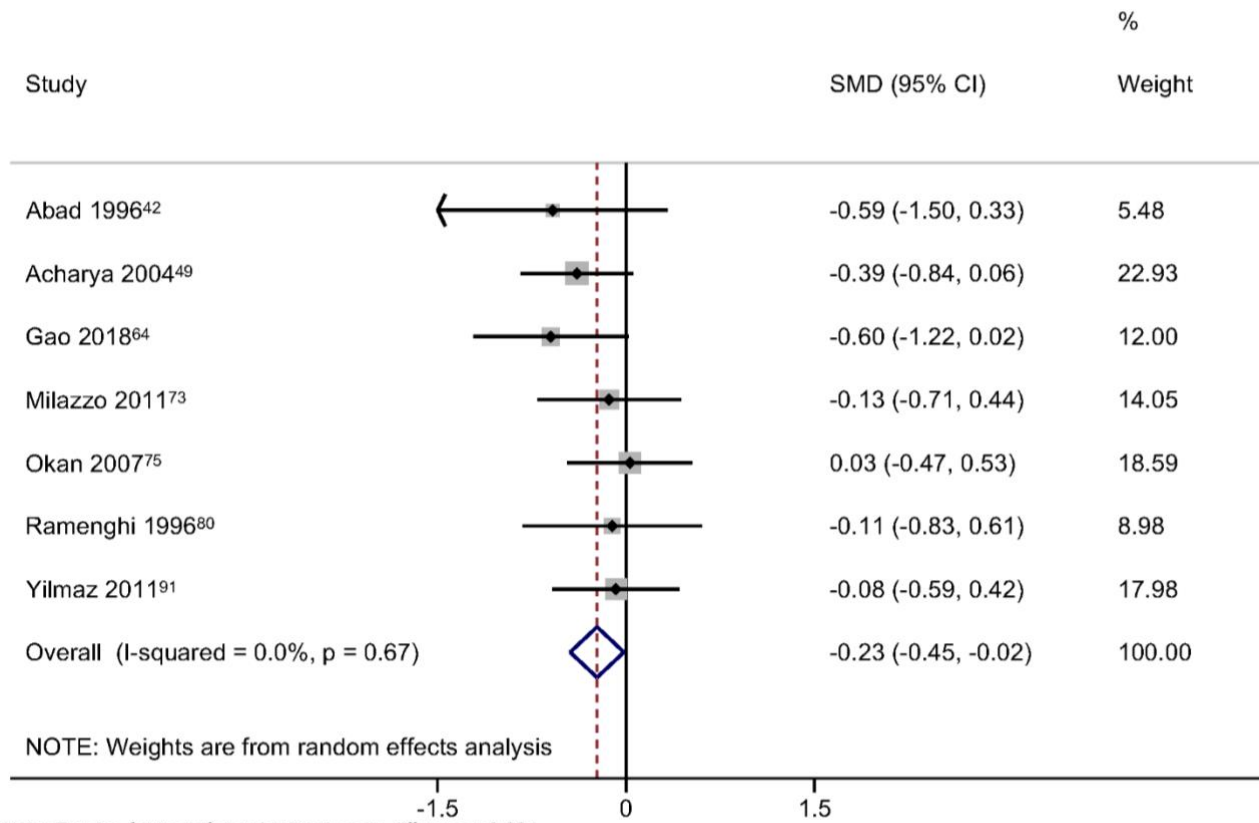

NOTE: Weights are from random effects analysis

Note: P-value for test of standardised mean difference: 0.034

Abbreviations: CI=confidence interval, SMD=standardised mean difference

**Supplementary Figure 46. Standardised mean differences and their confidence intervals for the comparison of oral sugar versus placebo or no intervention with heart rate measured >1 minute after procedure commencement**

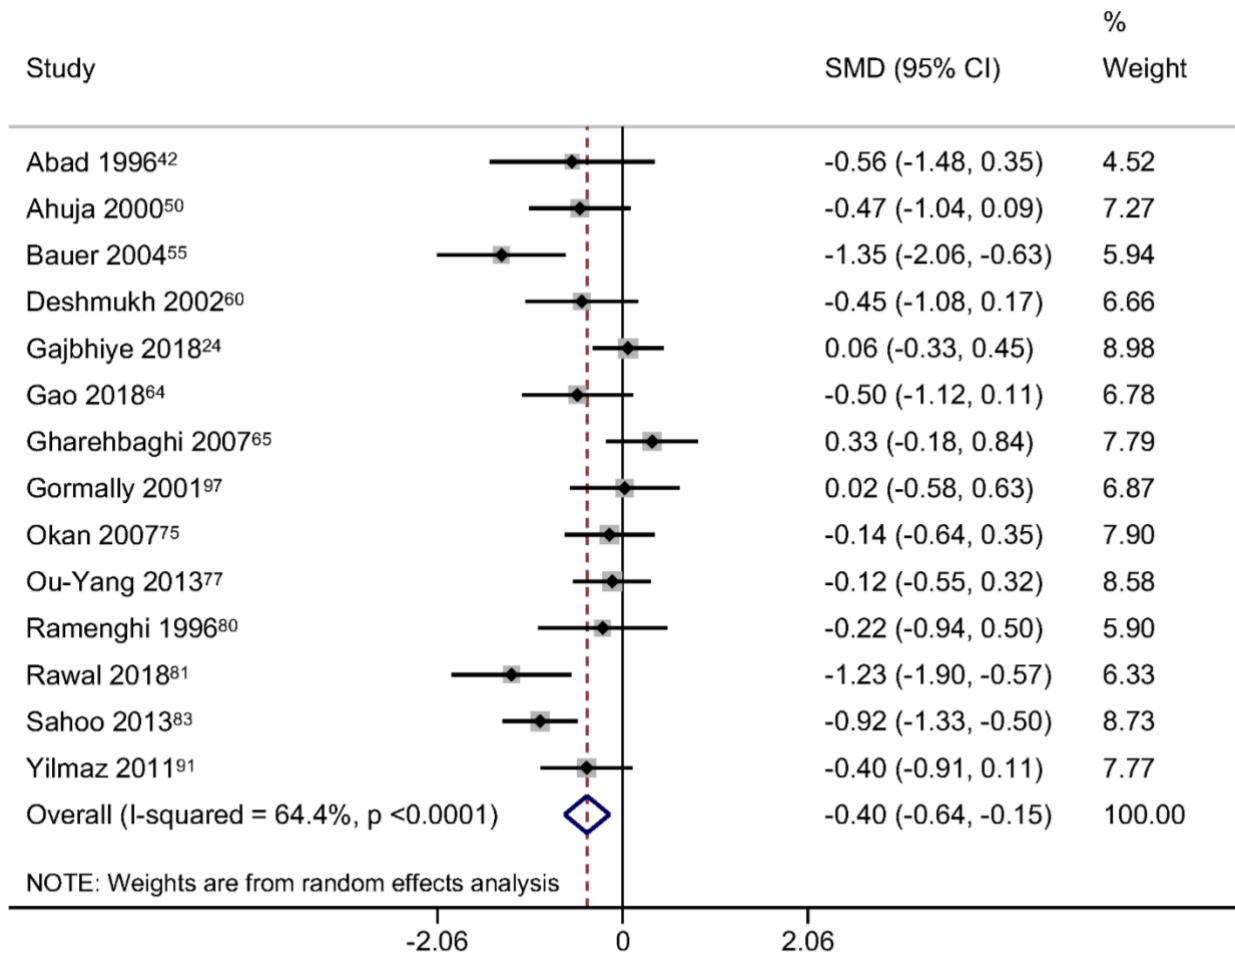

Note: P-value for test of standardised mean difference: 0.002  
 Abbreviations: CI=confidence interval, SMD=standardised mean difference

**Supplementary Figure 47. Standardised mean differences and their confidence intervals for the comparison of oral sugar versus placebo or no intervention with oxygen saturation measured  $\leq 1$  minute after procedure commencement**

%

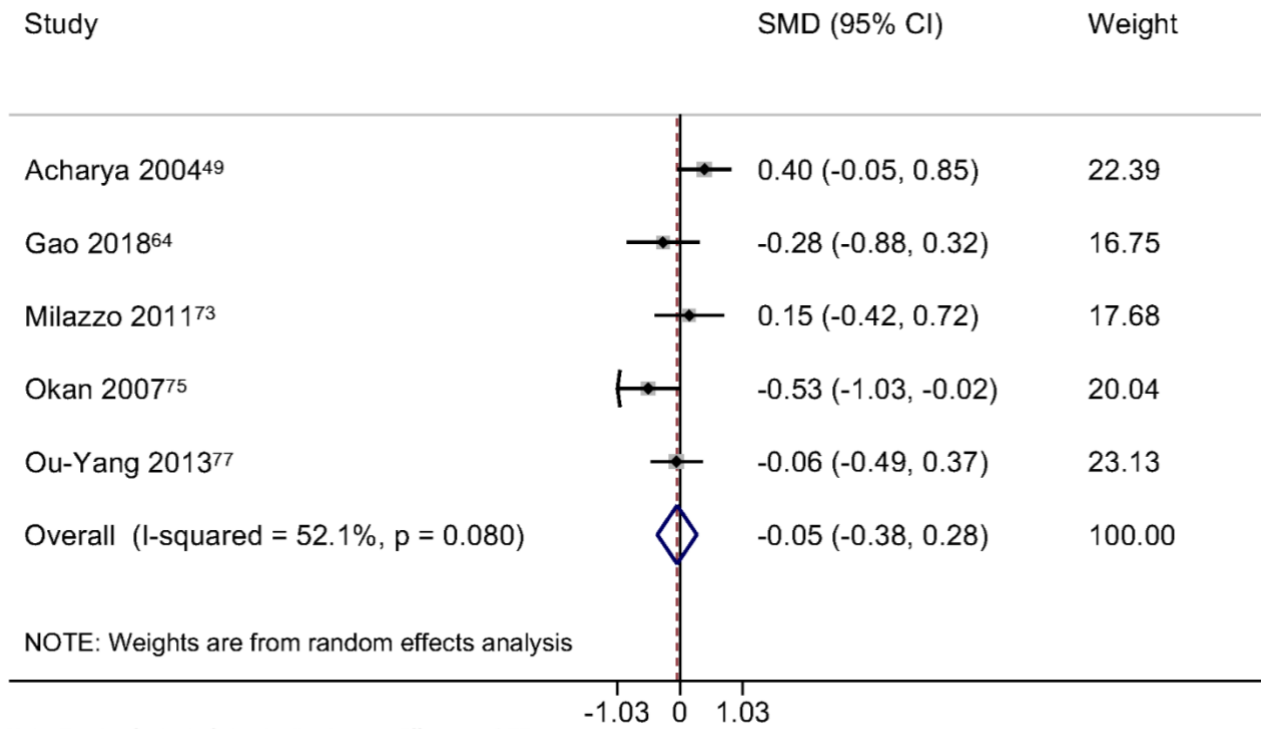

NOTE: Weights are from random effects analysis

Note: P-value for test of standardised mean difference: 0.77

Abbreviations: CI=confidence interval, SMD=standardised mean difference

**Supplementary Figure 48. Standardised mean differences and their confidence intervals for the comparison of oral sugar versus placebo or no intervention with oxygen saturation measured >1 minute after procedure commencement**

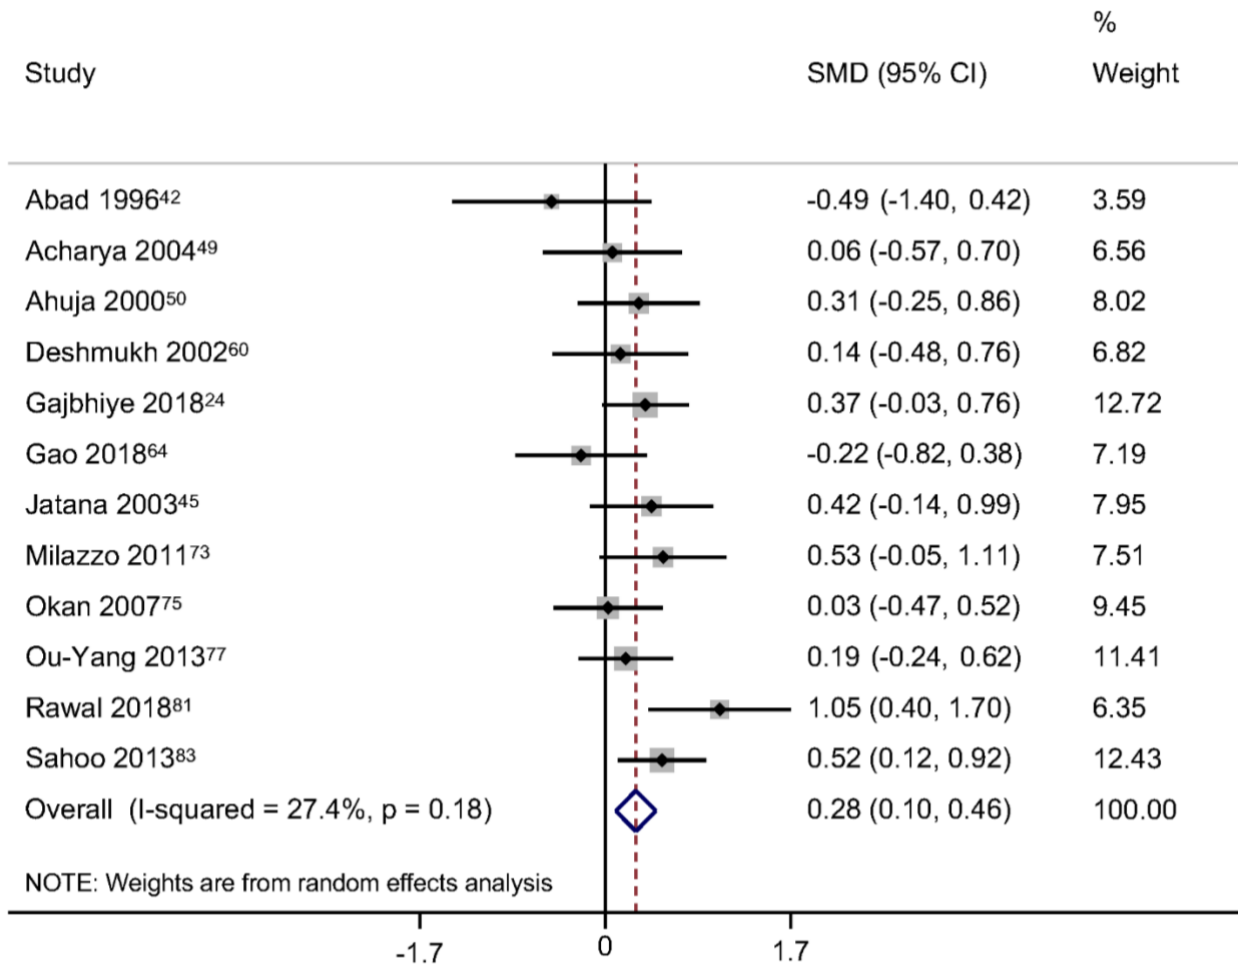

Note: P-value for test of standardised mean difference: 0.003  
 Abbreviations: CI=confidence interval, SMD=standardised mean difference

**Supplementary Figure 49. Standardised mean differences and their confidence intervals for the comparison of oral sugar versus placebo or no intervention with PIPP measured  $\leq 1$  minute after procedure commencement**

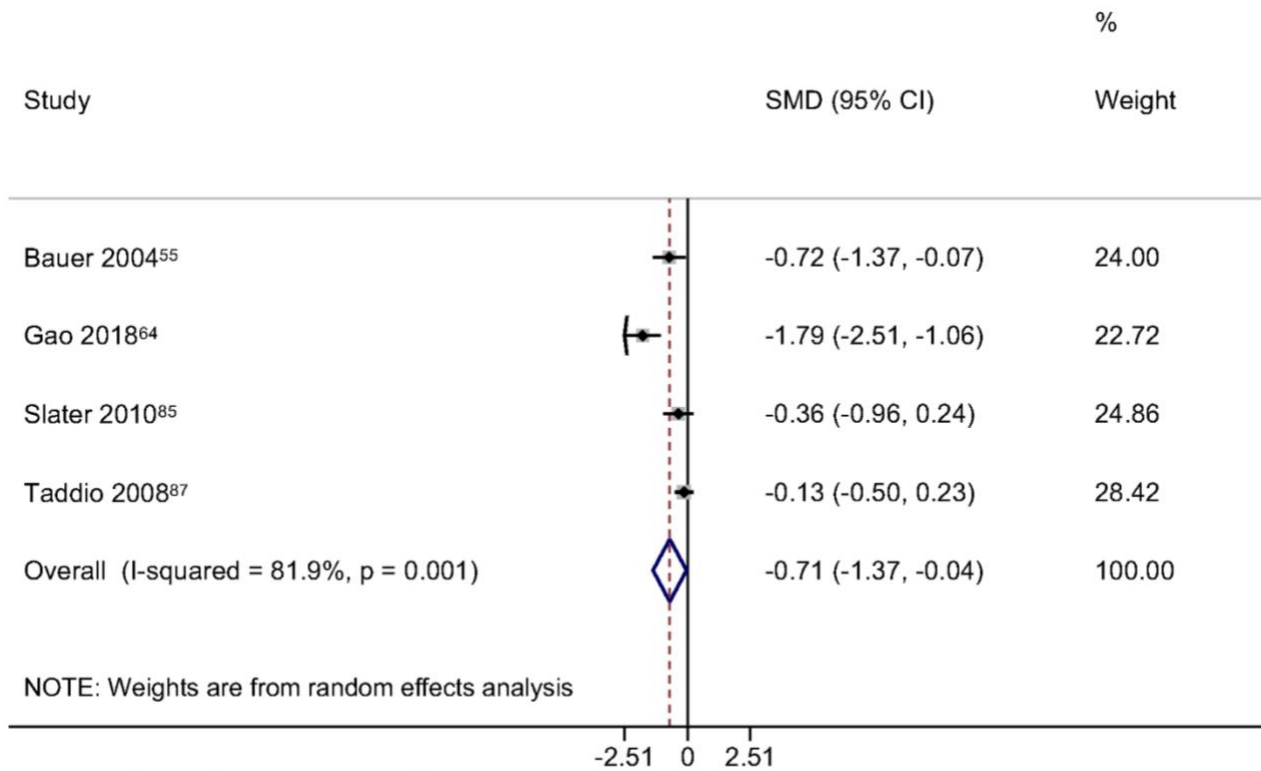

Note: P-value for test of standardised mean difference: 0.038

Abbreviations: CI=confidence interval, SMD=standardised mean difference, PIPP=Premature Infant Pain Profile

**Supplementary Figure 50. Standardised mean differences and their confidence intervals for the comparison of oral sugar versus placebo or no intervention with PIPP measured >1 minute after procedure commencement**

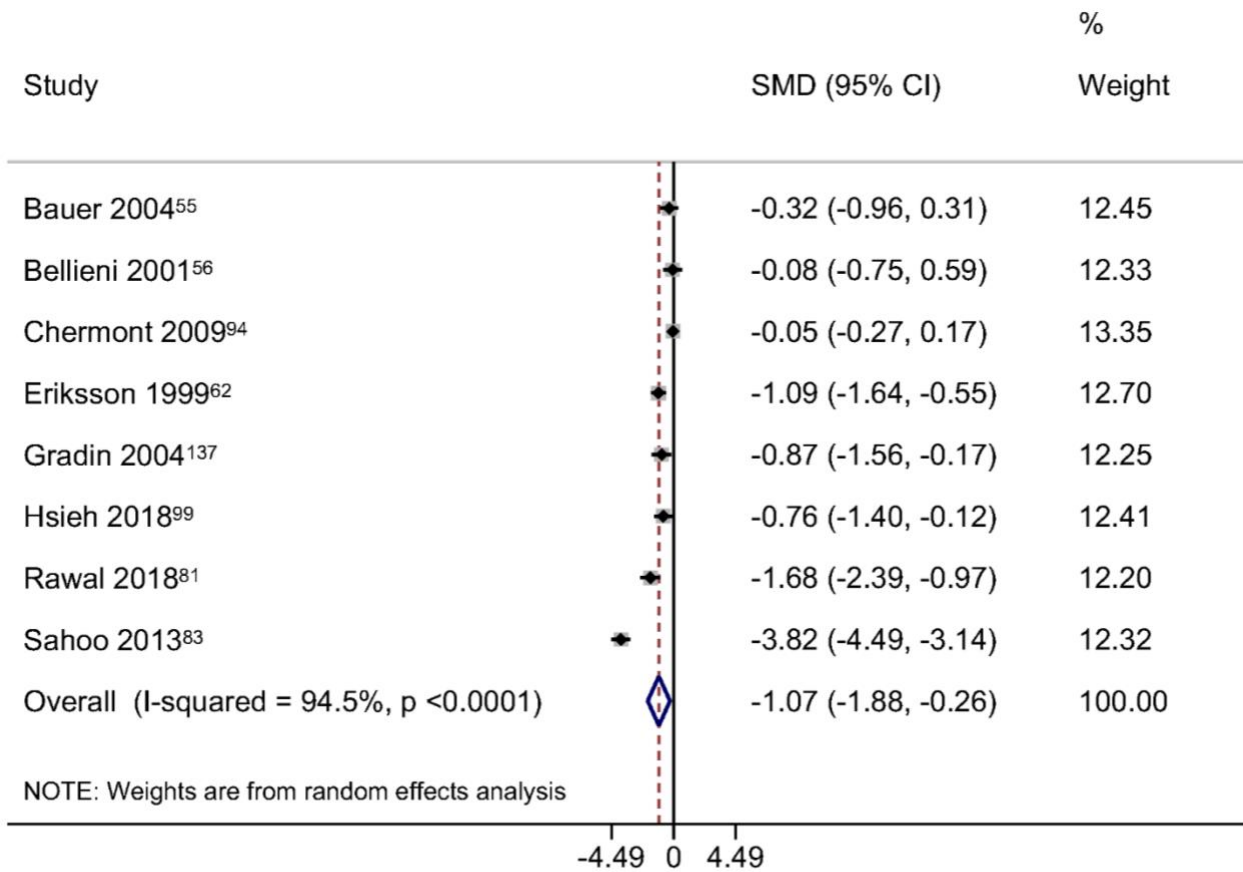

Note: P-value for test of standardised mean difference: 0.010

Abbreviations: CI=confidence interval, SMD=standardised mean difference, PIPP=Premature Infant Pain Profile

**Supplementary Figure 51. Standardised mean differences and their confidence intervals for the comparison of oral sugar versus placebo or no intervention for heart rate by prematurity status**

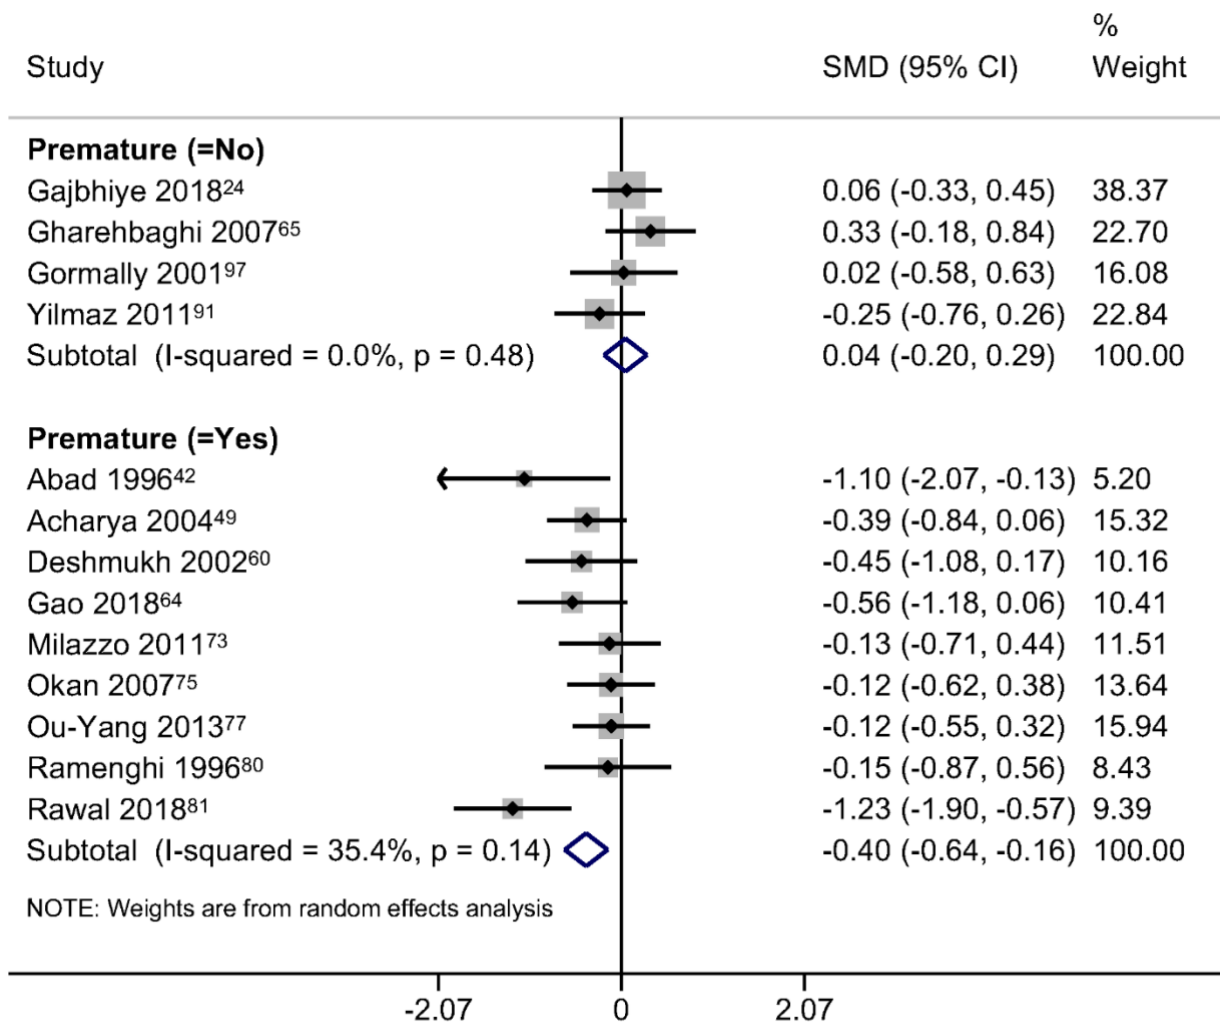

**Supplementary Figure 52. Standardised mean differences and their confidence intervals for the comparison of oral sugar versus placebo or no intervention for oxygen saturation by prematurity status**

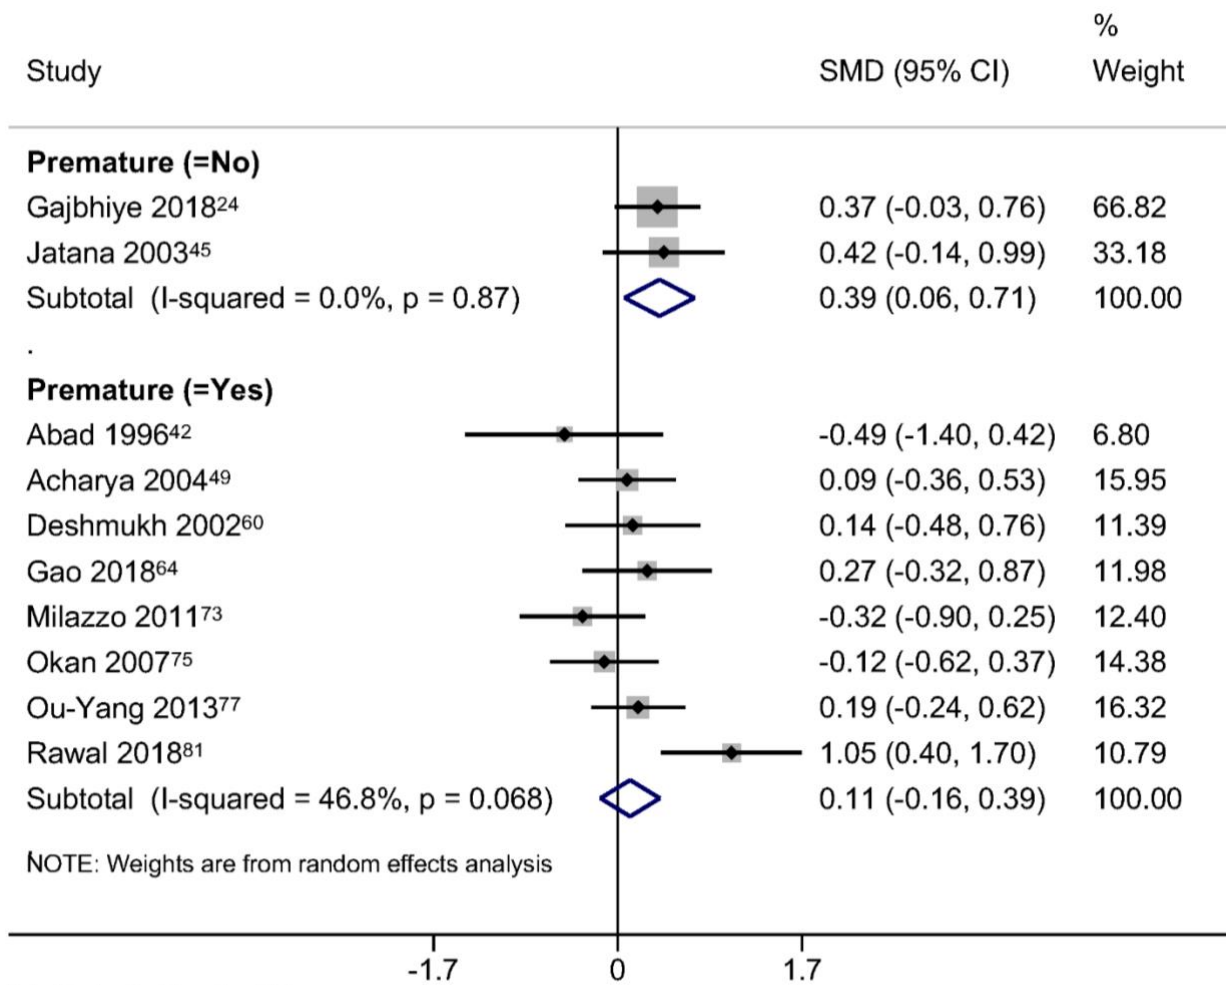

Note: P-value for interaction: 0.65

Abbreviations: CI=confidence interval, SMD=standardised mean difference



**Supplementary Figure 53. Standardised mean differences and their confidence intervals for the comparison of oral sugar versus placebo or no intervention for PIPP by prematurity status**

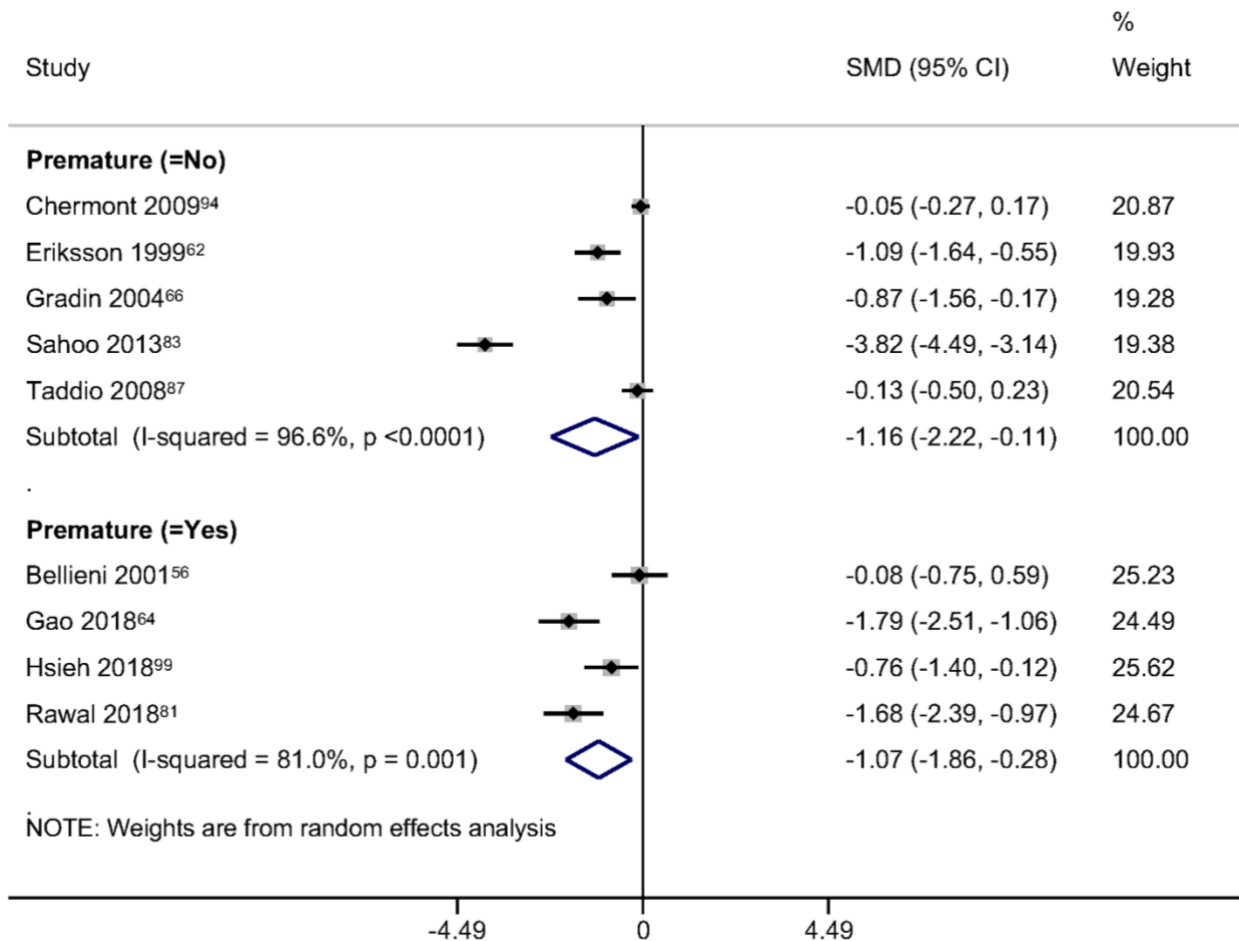

Note: P-value for interaction: 0.48

Abbreviations: CI=confidence interval, SMD=standardised mean difference, PIPP=Premature Infant Pain Profile

Supplementary Figure 54. Funnel plot (with pseudo 95% confidence limits) of studies for oral sugar versus placebo or no intervention using heart rate<sup>24, 42, 49, 50, 55, 60, 64, 65, 73, 75, 77, 80, 81, 83, 91, 97</sup>

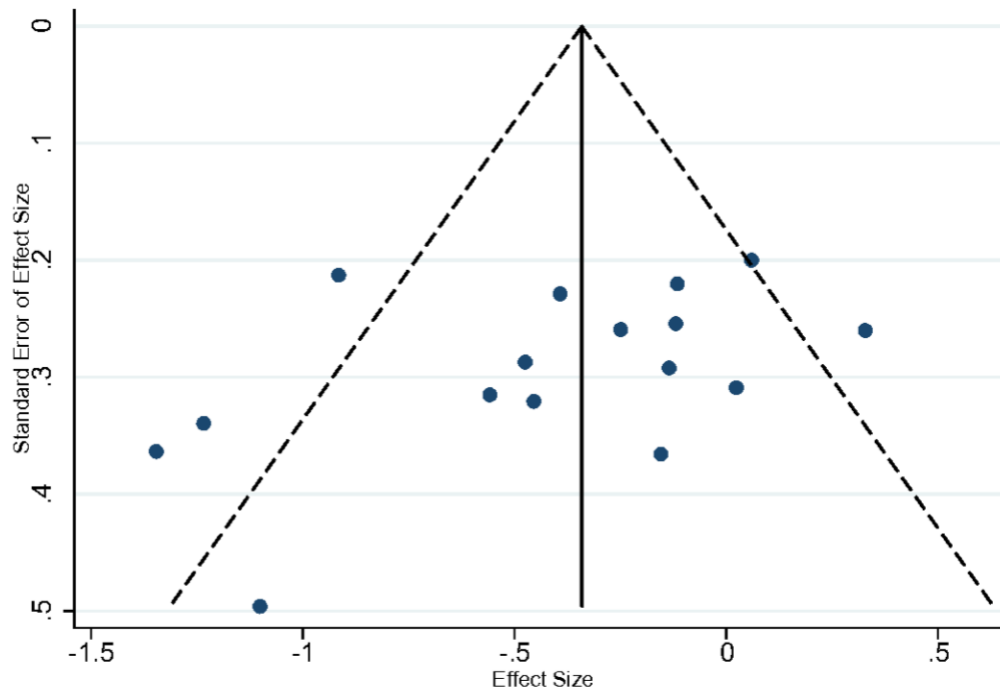

Supplementary Figure 55. Funnel plot (with pseudo 95% confidence limits) of studies for oral sugar versus placebo or no intervention using oxygen saturation<sup>24, 42, 49, 50, 60, 64, 45, 73, 75, 77, 81, 83</sup>

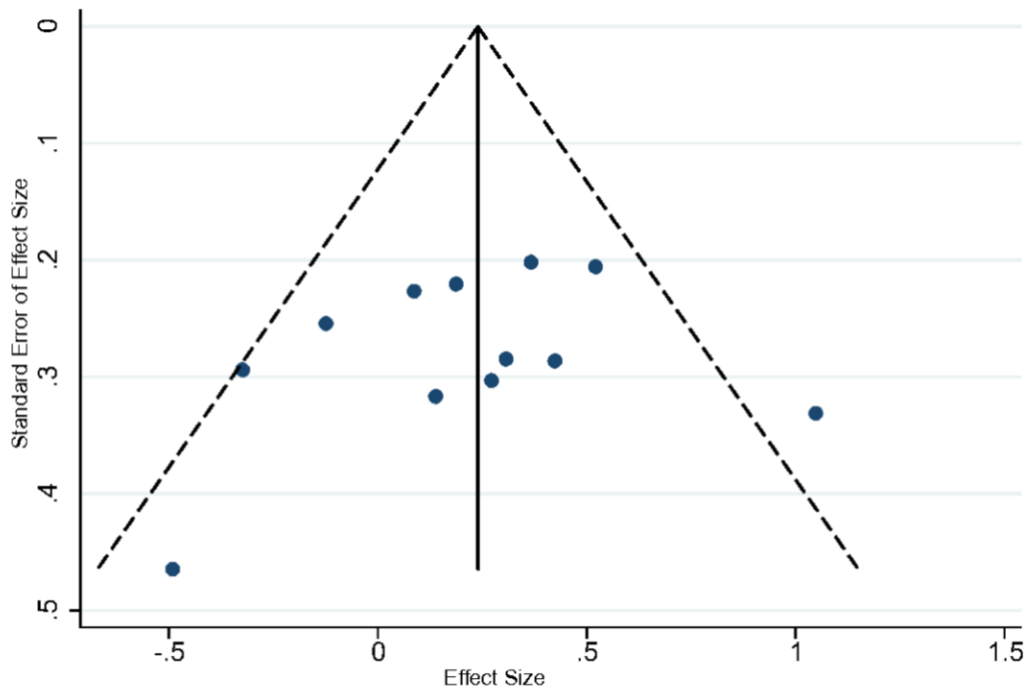

Supplementary Figure 56. Funnel plot (with pseudo 95% confidence limits) of studies for oral sugar versus placebo or no intervention using Premature Infant Pain Profile (PIPP)<sup>55, 56, 62, 64, 66, 81, 83, 85, 87, 94, 99</sup>

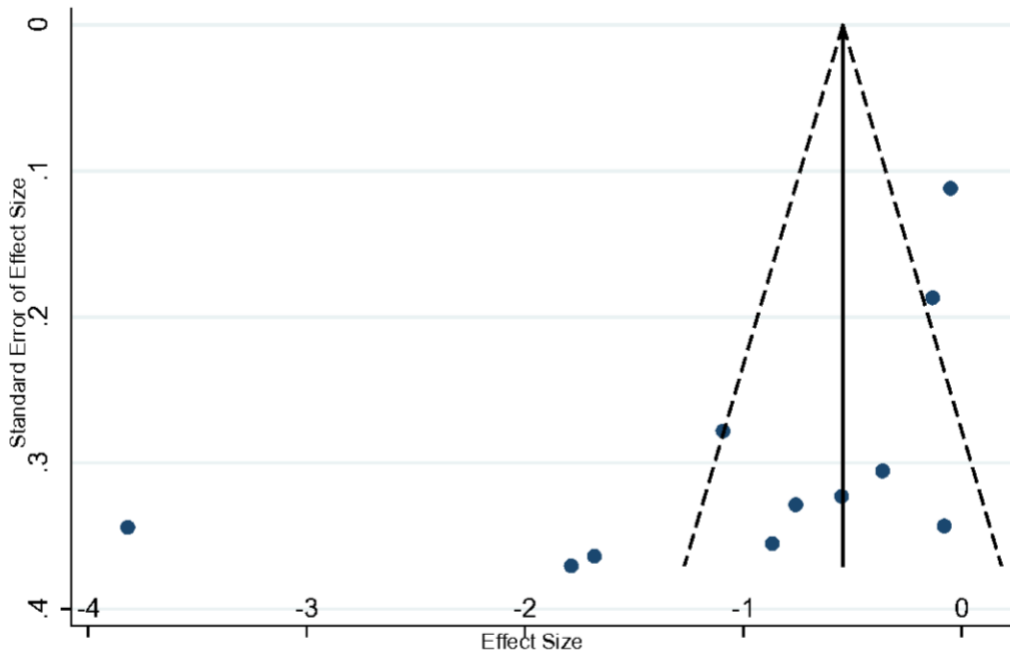

## Further reading panel of references for PICO questions deprioritised by the Neonatal Pain Guideline Group

- 130 Acharya AB, Bustani PC, Phillips JD, Taub NA, Beattie RM. Randomised controlled trial of eutectic mixture of local anaesthetics cream for venepuncture in healthy preterm infants. *Arch Dis Child Fetal Neonatal Ed* 1998; 78: F138–42.
- 131 Badiee Z, Torcan N. Effects of high dose orally administered paracetamol for heel prick pain in premature infants. *Saudi Med J* 2009; 30: 1450–53.
- 132 Beken S, Hirfanoglu IM, Gücüyener K, et al. Cerebral hemodynamic changes and pain perception during venipuncture: is glucose really effective? *J Child Neurol* 2014; 29: 617–22.
- 133 Bellieni CV, Aloisi AM, Ceccarelli D, et al. Intramuscular injections in newborns: analgesic treatment and sex-linked response. *J Matern Fetal Neonatal Med* 2013; 26: 419–22.
- 134 Biran V, Gourrier E, Cimerman P, Walter-Nicolet E, Mitanchez D, Carbajal R. Analgesic effects of EMLA cream and oral sucrose during venipuncture in preterm infants. *Pediatrics* 2011; 128: e63–70.
- 135 Bucher HU, Moser T, von Siebenthal K, Keel M, Wolf M, Duc G. Sucrose reduces pain reaction to heel lancing in preterm infants: a placebo-controlled, randomized and masked study. *Pediatr Res* 1995; 38: 332–35.
- 136 Butt ML, Kisilevsky BS. Music modulates behaviour of premature infants following heel lance. *Can J Nurs Res* 2000; 31: 17–39.
- 137 Campos RG. Soothing pain-elicited distress in infants with swaddling and pacifiers. *Child Dev* 1989; 60: 781–92.
- 138 Collados-Gomez L, Ferrera-Camacho P, Fernandez-Serrano E, et al. Randomised crossover trial showed that using breast milk or sucrose provided the same analgesic effect in preterm infants of at least 28 weeks. *Acta Paediatr* 2018; 107: 436–41.
- 139 De Bernardo G, Riccitielli M, Sordino D, et al. Oral 24% sucrose associated with nonnutritive sucking for pain control in healthy term newborns receiving venipuncture beyond the first week of life. *J Pain Res* 2019; 12: 299–305.
- 140 De Melo G, Cardoso M. Pain in preterm newborns submitted to music and 25% glucose intervention. *Revista da Rede de Enfermagem do Nordeste* 2017; 18: 3.
- 141 Erkut Z, Yildiz S. The effect of swaddling on pain, vital signs, and crying duration during heel lance in newborns. *Pain Manag Nurs* 2017; 18: 328–36.
- 142 Gerull R, Cignacco E, Stoffel L, Sellam G, Nelle M. Physiological parameters after nonpharmacological analgesia in preterm infants: a randomized trial. *Acta Paediatr* 2013; 102: e368–73.
- 143 Gibbins S, Stevens B, Hodnett E, Pinelli J, Ohlsson A, Darlington G. Efficacy and safety of sucrose for procedural pain relief in preterm and term neonates. *Nurs Res* 2002; 51: 375–82.
- 144 Gradin M, Eriksson M, Holmqvist G, Holstein A, Schollin J. Pain reduction at venipuncture in newborns: oral glucose compared with local anesthetic cream. *Pediatrics* 2002; 110: 1053–57.
- 145 Ho LP, Ho SS, Leung DY, So WK, Chan CW. A feasibility and efficacy randomised controlled trial of swaddling for controlling procedural pain in preterm infants. *J Clin Nurs* 2016; 25: 472–82.
- 146 Holsti L, Oberlander TF, Brant R. Does breastfeeding reduce acute procedural pain in preterm infants in the neonatal intensive care unit? A randomized clinical trial. *Pain* 2011; 152: 2575–81.
- 147 Huang CM, Tung WS, Kuo LL, Ying-Ju C. Comparison of pain responses of premature infants to the heelstick between containment and swaddling. *J Nurs Res* 2004; 12: 31–40.
- 148 Jain A, Rutter N. Does topical amethocaine gel reduce the pain of venepuncture in newborn infants? A randomised double blind controlled trial. *Arch Dis Child Fetal Neonatal Ed* 2000; 83: F207–10.
- 149 Johnston CC, Filion F, Campbell-Yeo M, et al. Kangaroo mother care diminishes pain from heel lance in very preterm neonates: a crossover trial. *BMC Pediatr* 2008; 8: 13.
- 150 Kaur G, Gupta P, Kumar A. A randomized trial of eutectic mixture of local anesthetics during lumbar puncture in newborns. *Arch Pediatr Adolesc Med* 2003; 157: 1065–70.
- 151 Kristoffersen L, Malahleha M, Duze Z, et al. Randomised controlled trial showed that neonates received better pain relief from a higher dose of sucrose during venepuncture. *Acta Paediatr* 2018; 107: 2071–78.
- 152 Kurdahi Badr L, Demerjian T, Daaboul T, Abbas H, Hasan Zeineddine M, Charafeddine L. Preterm infants exhibited less pain during a heel stick when they were played the same music their mothers listened to during pregnancy. *Acta Paediatr* 2017; 106: 438–45.
- 153 Larsson BA, Tannfeldt G, Lagercrantz H, Olsson GL. Alleviation of the pain of venepuncture in neonates. *Acta Paediatr* 1998; 87: 774–79.
- 154 Lemyre B, Hogan DL, Gaboury I, Sherlock R, Blanchard C, Moher D. How effective is tetracaine 4% gel, before a venipuncture, in reducing procedural pain in infants: a randomized double-blind placebo controlled trial. *BMC Pediatr* 2007; 7: 7.
- 155 Leng HY, Zheng XL, Zhang XH, et al. Combined non-pharmacological interventions for newborn pain relief in two degrees of pain procedures: A randomized clinical trial. *Eur J Pain* 2016; 20: 989–97.
- 156 Lindh V, Wiklund U, Håkansson S. Assessment of the effect of EMLA during venipuncture in the newborn by analysis of heart rate variability. *Pain* 2000; 86: 247–54.
- 157 Long CP, McCafferty DF, Sittlington NM, Halliday HL, Woolfson AD, Jones DS. Randomized trial of novel tetracaine patch to provide local anaesthesia in neonates undergoing venepuncture. *Br J Anaesth* 2003; 91: 514–18.
- 158 Marcatto JO, Vasconcelos PC, Araújo CM, Tavares EC, Pereira e Silva Y. EMLA versus glucose for PICC insertion: a randomised triple-masked controlled study. *Arch Dis Child Fetal Neonatal Ed* 2011; 96: F467–68.
- 159 Marín Gabriel M., del Rey Hurtado de Mendoza B, Jimenez Figueroa L, et al. Analgesia with breastfeeding in addition to skin-to-skin contact during heel prick. *Arch Dis Child Fetal Neonatal Ed* 2013; 98: F499–503.
- 160 Marofi M, Nikobakht F, Badiee Z, Golchin M. The effect of melody on the physiological responses of heel sticks pain in neonates. *Iran J Nurs Midwifery Res* 2015; 20: 405–08.
- 161 Morrow C, Hiding A, Wilkinson-Faulk D. Reducing neonatal pain during routine heel lance procedures. *MCN Am J Matern Child Nurs* 2010; 35: 346–54, quiz 354–56.
- 162 Mosayebi Z, Javidpour M, Rahmati M, Hagani H, Movahedian A. The effect of kangaroo mother care on pain from heel lance in preterm newborns admitted to neonatal intensive care unit: a crossover randomized clinical trial. *J Compr Pediatr* 2014; 5: e22214.
- 163 Noori Shadkam M, Lofti M. Pain reducing in icteric newborns while venipuncturing: comparison of local anesthetic cream with orally glucose. *Acta Med Iran* 2008; 46: 58–62.
- 164 Patel A, Czerniawski B, Gray S, Lui E. Does topical amethocaine gel reduce pain from heel prick blood sampling in premature infants? A randomized double-blind cross-over controlled study. *Paediatr Child Health* 2003; 8: 222–25.
- 165 Peng HF, Yin T, Yang L, et al. Non-nutritive sucking, oral breast milk, and facilitated tucking relieve preterm infant pain during heel-stick procedures: a prospective, randomized controlled trial. *Int J Nurs Stud* 2018; 77: 162–70.
- 166 Rossi A, Molinaro A, Savi E, et al. Music reduces pain perception in healthy newborns: a comparison between different music tracks and recorded heartbeat. *Early Hum Dev* 2018; 124: 7–10.

- 167 Shabani F, Nayeri ND, Karimi R, Zarei K, Chehrazi M. Effects of music therapy on pain responses induced by blood sampling in premature infants: a randomized cross-over trial. *Iran J Nurs Midwifery Res* 2016; 21: 391–96.
- 168 Shah SR, Kadage S, Sinn J. Trial of music, sucrose, and combination therapy for pain relief during heel prick procedures in neonates. *J Pediatr* 2017; 190: 153–58.e2.
- 169 Shu SH, Lee YL, Hayter M, Wang RH. Efficacy of swaddling and heel warming on pain response to heel stick in neonates: a randomised control trial. *J Clin Nurs* 2014; 23: 3107–14.
- 170 Shukla V, Chapla A, Uperiya J, Nimbalkar A, Phatak A, Nimbalkar S. Sucrose vs skin to skin care for preterm neonatal pain control-a randomized control trial. *J Perinatol* 2018; 38: 1365–69.
- 171 Shukla VV, Bansal S, Nimbalkar A, et al. Pain control interventions in preterm neonates: a randomized controlled trial. *Indian Pediatr* 2018; 55: 292–96.
- 172 Soliman H, Elsharkawy A, Abdel-Hady H. Does topical lidocaine reduce the pain associated with the insertion of nasal continuous positive airway pressure prongs in preterm infants?: a randomized, controlled pilot trial. *Clin J Pain* 2016; 32: 948–54.
- 173 Stevens B, Johnston C, Franck L, Petryshen P, Jack A, Foster G. The efficacy of developmentally sensitive interventions and sucrose for relieving procedural pain in very low birth weight neonates. *Nurs Res* 1999; 48: 35–43.
- 174 Stevens B, Johnston C, Taddio A, et al. Management of pain from heel lance with lidocaine-prilocaine (EMLA) cream: is it safe and efficacious in preterm infants? *J Dev Behav Pediatr* 1999; 20: 216–21.
- 175 Stevens B, Yamada J, Campbell-Yeo M, et al. The minimally effective dose of sucrose for procedural pain relief in neonates: a randomized controlled trial. *BMC Pediatr* 2018; 18: 85.
- 176 Sujatha S, Samson R, Amalraj C, Sundaresan. Sucrose and facilitated tucking for pain among neonates receiving vaccination, in Puducherry. *Int J Pharm Clinl Res* 2017; 9: 260–63.
- 177 Taddio A, Shah V, Stephens D, et al. Effect of liposomal lidocaine and sucrose alone and in combination for venipuncture pain in newborns. *Pediatrics* 2011; 127: e940–47.
